# Supplementary material for: Integrative Analysis of Cancer Omics Data for Prognosis Modeling
Source: Genes (Basel). 2019 Aug 9;10(8):604. doi: 10.3390/genes10080604 (PMC6727084; doi:10.3390/genes10080604)
Supplement: Supplementary file 1 [file genes-10-00604-s001.xlsx]

## Sheet: Estimation for marginal model
	A1											A2											A3
	BLCA	BRCA	GBM	HNSC	LAML	LUAD	LUSC	OV	PAAD			BLCA	BRCA	GBM	HNSC	LAML	LUAD	LUSC	OV	PAAD			BLCA	BRCA	GBM	HNSC	LAML	LUAD	LUSC	OV	PAAD
ABI1	0	0	0	0	0	0	0	0	0			0	0	0	0	0	0	0	0	0			0	0	0	0	0	-0.240526	0	0	0
ABL2	0	0	0	0	0	0	0	0	0			0	0	0	0	0	0	0	0	0			0	-0.161919	0	0	0	0	0	0	0.206855
ABLIM1	0	0	0	0.0515927	0	0	0	0	0			0	0	0	0	0	0	0	0	0			0.169539	-0.242038	0	0.240172	0	0	0	0	0
ACACA	0	0	0	0	0	0	0	0	0			0	0	0	0	0	0	0	0	0			0	0	0	0	0	0	0	0	0
ACSBG1	0	0	0	0	0	0	0	0	0			0	0	0	0	0	0	0	0	0			0	-0.102044	0	0	0	0	0	0	0
ACSL6	0	0	0	0.0642109	0	0	0	0	0			0	0	0	0	0	0	0	0	0			0	-0.116229	0	0.213679	0	0	0	0	0
ACVR1B	0	0	0	0	0	0	0	0	0			0	0	0	0	0	0	0	0	0			0	0	0	-0.189154	0	0	0	0	-0.161368
ACVR1C	0	0	0	0	0	0	0	0	0			0	0	0	0	0	0	0	0	0			0	0	0	0	0	0	0	0	0
ACVR2A	0	0	0	0.0524575	0	0	0.0757513	0	0			0	0.0688807	0.054654	0.0753955	0.051683	0	0.120263	0.0545453	0.0520566			-0.232806	0.225369	0	0	0	0	0.258963	0	0
ADD3	0	0	0	0	0	0	0	0	0			0	0	0	0	0	0	0	0	0			0.145479	0.254636	0	0	0	0	-0.278422	0	0
ADM	0	0	0	0	0	0	0	0	0			0	0	0	0	0	0	0	0	0			0	-0.410369	0	0	0	-0.122521	-0.185601	-0.207019	0.233611
AFF3	0	0	0	0.0505251	0	0.0692042	0.0926267	0	0			0	0	0.0574591	0.0639858	0.0593093	0.0823773	0.137069	0.0532218	0			-0.243611	0	0	0	0	0.145599	0.261567	0	0
AFF4	0	0	0	0	0	0	0	0	0			0	0	0	0	0	0	0	0	0			0	-0.115656	-0.336602	0	0	0	-0.252359	0	0
AGR3	0	0	0	0	0	0	0	0	0			0	0	0	0	0	0	0	0	0			0	0	0	0	0	0	-0.303112	-0.257505	0
AHI1	0	0	0	0	0	0	0	0	0			0	0	0	0	0	0	0	0	0			0	0.343841	0	0	0	-0.317732	-0.273726	0	0
AHR	0	0	0.0734473	0	0.0633918	0	0	0	0			0.0537439	0	0.099094	0.0677736	0.0844587	0.052591	0	0	0.0533776			0	-0.215201	0.197198	0	0	0	0	-0.18406	0
AIP	0	0	0	0	0	0	0	0	0.0687093			0	0	0	0	0	0	0	0	0			-0.130676	-0.174836	0.213559	-0.202258	0	-0.187713	0	0	0.248265
AK2	0	0	0	0	0	0	0	0	0			0	0	0	0	0	0	0	0	0			0	0	0	0	0	-0.11585	0	0	0
AK5	0	0	0	0	0	0	0	0	0			0	0	0	0	0	0	0	0	0			-0.194117	0	0	0	0	0	0	0	0
AKAP6	0	0	0	0.0746187	0	0.0653302	0	0	0			0	0	0	0	0	0	0	0	0			0	0	0	0.225361	0	0.181674	-0.359361	0	0
AKT1	0	0	0	0	0	0	0	0	0			0	0	0	0	0	0	0	0	0			0	0	0	-0.240698	-0.262147	0	-0.286955	0	0
AKT2	0.0834924	0	0.0539006	0.094908	0	0.0856098	0.0581393	0.0500288	0.0614624			0	0	0	0	0	0	0	0	0			0.192508	0	0	0.293929	0	0.225071	0	0	0
AKT3	0	0.069501	0	0	0.0950935	0	0.105481	0	0			0	0	0	0	0	0	0	0	0			0	0.180766	0	-0.241869	0.260881	-0.186853	0.536516	0	0
ALDH1A1	0	0	0	0	0	0	0	0	0			0	0	0	0	0	0	0	0	0			0	0	0	0	-0.322546	0	0	0	0
ALDH2	0	0	0	0	0	0	0	0	0			0	0	0	0	0	0	0	0	0			0	0	0	0	0	0	-0.214277	0	0
ALDOC	0	0	0	0	0	0	0	0	0			0	0	0	0	0	0	0	0	0			0	0	0	0	0	0	0	0	-0.198461
ALK	0	0	0	0	0	0	0	0	0			0	0	0	0	0	0	0	0	0			0	0.108246	0	0	0	0	-0.303916	0	0
AMH	0.0508447	0	0	0	0.0716649	0	0	0	0			0.0780546	0	0	0	0.105478	0.057331	0	0	0.0589107			0.210621	-0.167982	0	0	0.236222	0	0	-0.179143	0
ANGPT1	0	0	0	0	0	0	0	0	0			0	0	0	0	0	0	0	0	0			0	0	0	0	-0.237508	0	0	0	0
ANKRD28	0.0525102	0	0	0	0	0.100294	0	0	0.110206			0.0665958	0	0	0	0.0508832	0.148227	0	0	0.187417			0.265014	-0.169318	0	0	0	0.310799	-0.150883	0	0.344709
ANLN	0	0	0	0	0	0	0.161144	0	0			0	0	0.0506076	0	0.0506483	0.0555149	0.365393	0.0552288	0			-0.120367	0	0	-0.198188	0	0	0.411858	0	-0.288153
APC	0	0	0	0	0	0	0	0	0			0	0	0	0	0	0	0	0	0			0	0	0	0	0	0	0	0	0
APH1A	0.146593	0.109879	0.104614	0.105835	0.136061	0.149771	0.112052	0.119259	0.14473			0.099973	0.0526843	0.0534893	0.050718	0.0847877	0.118767	0.0550801	0.063415	0.0930977			0.288556	0	0	0	0	0.246932	0	0	0.292477
APOD	0	0	0	0	0	0	0	0	0			0	0	0	0	0	0	0	0	0			0	0.158908	0	0.160498	0	-0.113328	0	0	0
ARAF	0	0	0	0	0	0	0	0	0			0	0	0	0	0	0	0	0	0			0	0	0	0	0	-0.156506	0	0	0
ARHGAP20	0	0	0	0	0	0	0	0	0			0	0	0	0	0	0	0	0	0			0	-0.0482818	0	0	0	-0.140952	-0.316258	-0.167584	0
ARHGAP26	0	0	0	0.0663034	0	0	0	0	0			0	0	0	0	0	0	0	0	0			-0.176991	-0.195943	0	0.199651	0	-0.252996	-0.261819	0	0
ARHGEF7	0	0	0	0	0	0	0	0	0			0	0	0	0	0	0	0	0	0			0	-0.20831	0	0	0	0	-0.281497	0	0
ARID1A	0.0576326	0.0529662	0	0	0.0749878	0	0.0839385	0.108652	0.05734			0.0576959	0.0546243	0	0	0.073458	0.0515188	0.0868757	0.123189	0.0574716			0	0	0	0	0	0	0.182726	0.152271	0
ARID2	0	0	0	0	0	0	0	0	0			0	0	0	0	0	0	0	0	0			0	0	0	0	0	-0.226904	0	-0.220722	-0.302454
ARIH2	0.0679113	0	0	0	0	0	0	0	0			0	0	0	0	0	0	0	0	0			0.25092	-0.115414	0	0	0	0	-0.284334	0	-0.312995
ARNT	0.0673353	0	0	0	0	0	0	0	0			0.0874379	0.0522172	0	0	0.0758962	0	0.0576698	0	0.0580865			0.111375	0	0	0	0	0	0	0	0
ARRDC4	0	0	0	0	0	0	0	0	0			0	0	0	0	0	0	0	0	0			0	0	0	0	0	0	-0.1874	0	0.201368
AR	0	0	0	0	0	0	0.0565953	0	0			0	0	0	0	0	0	0	0	0			0	0	0	0	0	0	0.179009	0	0
ASMTL	0	0	0	0	0	0	0	0	0			0	0	0	0	0	0	0	0	0			0	-0.192337	0	0	0	-0.199902	-0.197445	0	0
ASXL1	0	0	0	0	0.0813495	0	0	0	0			0	0	0.0710978	0.0640334	0.116566	0	0	0	0			0	0	0	0	0.258619	-0.223147	0	0	0
ATF1	0	0	0	0	0	0	0	0	0			0	0	0	0	0	0	0	0	0			0	0	0	0	0	0	-0.180333	0	0
ATF3	0	0	0	0	0	0	0	0	0			0	0	0.051683	0.0813394	0.0567733	0	0.0522816	0	0			0	0	0	0.135305	0	0	0	0	0
ATG5	0	0	0	0	0	0	0	0	0			0	0	0	0	0	0	0	0	0			0.161511	-0.109052	0	0	0	0	0	0	0
ATIC	0	0.0932617	0.102739	0.0814562	0.0878026	0.0616479	0.139983	0.0590706	0			0	0.0752327	0.094443	0.065074	0.072279	0.0517098	0.22667	0.0504671	0			-0.13785	0.396823	0.225136	0	0	0	0.328095	0	-0.167833
ATL1	0	0	0	0.0665568	0.074555	0	0	0	0			0	0	0	0.0943559	0.102311	0.0540686	0	0.0632658	0.0567866			0	-0.153002	0	0.277957	0	0	-0.347814	0	0
ATM	0	0	0	0	0	0	0	0	0			0	0	0	0	0	0	0	0	0			0	-0.0820687	0	0	0	0	0	0	0
ATP1B4	0	0	0	0	0	0	0	0	0			0	0	0	0	0	0	0	0	0			0	-0.147335	0	0	0	0	-0.405577	0.143462	0
ATP8A2	0	0	0	0	0	0.0813984	0	0	0			0.0536509	0	0.0644417	0	0.0613211	0.122367	0	0	0			0	-0.100225	0	0	0	0.231341	0	0	0
ATRNL1	0	0	0	0	0	0	0	0	0			0	0	0	0	0	0	0	0	0			0	0	0	0	0	0	0	-0.201335	-0.200166
ATR	0	0	0	0.0623736	0	0	0	0	0			0.0525488	0	0.055986	0.0818493	0	0	0	0.0546124	0.0717103			0	0	0	0.113486	0	-0.180295	0	0	0
AURKA	0	0	0	0	0	0	0	0	0			0	0	0	0	0	0	0	0	0			0	0	0	0	0	-0.221288	-0.301195	0	0
AURKB	0	0.0723579	0	0	0	0	0.187439	0.0672854	0.110809			0	0.064341	0	0	0	0	0.377282	0.0617426	0.119111			-0.199147	0.173494	0	0	0	0	0.424034	0	0.262259
AUTS2	0	0	0	0	0.0833643	0.0928729	0	0	0			0.0551333	0	0.0501677	0.0591546	0.118185	0.127714	0	0	0			0	-0.0980035	0	0	0.27155	0.205514	-0.253453	0	0
AXIN1	0.0676895	0.086556	0.0718693	0.10543	0.10941	0.0870215	0	0.0832708	0			0.0563188	0.073573	0.0594194	0.10371	0.113614	0.0730196	0	0.0698552	0			0	0.138423	0	0.233694	0.25638	0.155544	0	0	0
AXL	0	0	0	0	0	0	0	0	0			0	0	0	0	0	0	0	0	0			0	0.0755507	0	0	0	0	0	0	0
BACH1	0	0	0	0	0	0	0.0740052	0	0			0	0	0.0507112	0.0570504	0.0695428	0	0.119421	0.0644601	0			0	0	0	0	0	0	0.28153	0	-0.279519
BACH2	0	0	0	0	0	0	0	0	0			0	0	0	0	0	0	0	0	0			-0.125413	-0.166216	0	0	0	0	-0.188733	0	0
BAP1	0	0	0	0	0	0	0	0	0			0	0	0	0	0	0	0	0	0			-0.340466	0	0	-0.414274	0	0	-0.208781	0	0
BARD1	0	0	0	0	0	0	0	0	0			0	0	0	0	0	0	0	0	0			0	-0.101466	0	0	0	0.179901	0	0	-0.168796
DDX39B	0	0	0	0	0	0	0	0	0			0	0	0	0	0	0	0	0	0			0	0	0	0	0	0	-0.551733	0	-0.219063
BAX	0	0	0	0	0	0	0	0	0			0	0	0	0	0	0	0	0	0			0	0	0	0	0	0	-0.41443	0	0
BAZ2A	0	0	0	0	0	0	0	0	0			0	0	0	0	0	0	0	0	0			0	-0.13593	0	0	0	0.138529	-0.489952	0	0
BCAS3	0	0	0	0	0.0539918	0	0	0.0526449	0.0500744			0	0	0	0	0	0	0	0	0			0	0.106214	0	0	0	0	0	0.154542	0
BCL10	0	0	0	0	0	0	0	0	0			0	0	0	0	0	0	0	0	0			0	0	0	0	0	-0.300488	-0.288834	0	0
BCL11B	0	0	0	0.122772	0.121908	0.106944	0	0	0.0624123			0	0	0	0	0	0	0	0	0			0	-0.0732567	0	0.294519	0.472065	0.367015	-0.261066	0	0
BCL2A1	0	0	0	0	0.0740483	0	0.136758	0	0			0	0	0	0	0.0886575	0	0.327606	0	0.0533614			-0.146459	-0.18175	0	0	0	0	0.429937	-0.182928	0
BCL2L1	0	0	0	0	0	0.0559024	0	0.0608044	0			0	0	0	0	0	0	0	0	0			0	0	0	0	0	0.19817	0	0.178375	0.567299
BCL2L2	0	0	0	0.0913085	0.0642519	0.0729418	0.0832451	0	0			0	0	0	0.1118	0.0716555	0.0807936	0.101244	0.052325	0			-0.213074	-0.151329	0	0.223202	0	0.155448	0.399562	0	0
BCL2	0	0	0	0	0	0	0	0	0			0	0	0	0	0	0	0	0	0			0	0	0.182005	0	0	0	0	0	0
BCL7A	0	0	0	0	0	0	0	0	0			0	0	0	0	0	0	0	0	0			-0.243498	-0.201793	0	0	0	0	0	0	-0.204147
BCL9	0	0	0	0.0682217	0.0538084	0	0	0.0742802	0			0.0511095	0.0543084	0	0.0955589	0.0728469	0	0.0511233	0.0942052	0.0540887			0	0	0	0.246359	0	0	0	0.139787	0
BCORL1	0	0	0	0	0	0	0	0	0			0	0	0	0	0	0	0	0	0			0	-0.0717754	0	0.210183	-0.270116	0	-0.390715	0	-0.262045
BCR	0	0	0	0	0	0	0	0	0			0	0	0	0	0	0	0	0	0			0	0	0	0	0	0	0	-0.193619	0
BHLHE22	0	0	0	0.0550919	0	0	0	0	0			0	0	0	0	0	0	0	0	0			0	-0.0693201	0	0.201472	0	0	0	0	0
BICC1	0	0	0	0	0	0	0	0	0			0	0	0	0	0	0	0	0	0			0	0	0	0	0	-0.157964	-0.178733	0	0
BIN1	0	0	0	0	0	0	0	0	0			0	0	0	0	0	0	0	0	0			0	0	0	0	0	-0.165389	-0.202441	0	0
BIRC3	0	0	0	0	0	0	0	0	0			0	0	0	0	0	0	0	0	0			0	0.105903	0	0	0	-0.121829	-0.187211	0	0
BIRC6	0	0	0	0	0	0	0	0	0			0	0	0	0	0	0	0	0	0			0	-0.454421	0	0	0	-0.126219	-0.159168	0	0
BLM	0	0	0	0.104165	0	0	0	0	0			0	0	0.068486	0.144381	0	0	0	0	0			0	-0.0823775	0	0.230541	-0.245522	-0.190794	0	0	0
BMP4	0	0	0	0.0826965	0	0	0	0	0			0	0.0739634	0.0610794	0.120015	0	0	0	0	0			0	0.189769	0	0.25895	0	-0.124934	0	0	0
BRAF	0	0	0	0	0	0	0	0	0			0	0	0	0	0	0	0	0	0			0	0	0	0	-0.288948	0	-0.199405	-0.202449	0
BRCA1	0	0	0	0	0	0	0	0	0			0	0	0	0	0	0	0	0	0			0.151758	0	0	0	0	0	0	0	0
BRCA2	0	0	0	0	0	0	0.0659149	0	0			0	0	0	0	0	0	0	0	0			0	-0.095079	-0.232914	0	0	0.128546	0.220443	0	-0.294645
BRIP1	0	0	0	0	0	0	0	0	0			0	0	0	0	0	0	0	0	0			-0.190217	0	0	0	0	-0.363643	-0.32081	-0.193557	0
BRSK1	0	0	0	0	0	0	0	0	0			0	0	0	0	0	0	0	0	0			0.201738	-0.194047	-0.2179	0	0	0	0	0	0
BRWD3	0	0	0	0	0.0645753	0	0	0	0			0.0598981	0	0.0625822	0	0.117622	0.0528157	0	0	0			0	-0.17551	0	0	0.296013	0	0	0	0
BTG1	0	0	0	0.0938983	0	0	0	0	0			0.05599	0	0.0696153	0.199786	0.0596606	0.052493	0	0	0.0511179			0	-0.12297	0	0.382489	0	0	-0.248756	0	0
BTG2	0	0	0	0	0	0	0	0	0			0	0	0	0	0	0	0	0	0			0	-1.39777	0	0	0	-0.138368	0	0	0
BTK	0	0	0	0	0	0	0	0	0			0	0	0	0	0	0	0	0	0			0	-0.306411	0	0	0	0	-0.328716	0	0.215148
BTLA	0	0	0	0	0	0	0	0	0			0	0	0	0	0	0	0	0	0			-0.193787	0	0	0	0	-0.204137	0	0	0.195111
BUB1B	0	0	0	0	0	0	0	0	0			0	0	0	0	0	0	0	0	0			0	-0.0789707	0	0	-0.304759	0	-0.30326	-0.161761	0
C11orf1	0	0	0	0	0	0	0	0	0			0	0	0	0	0	0	0	0	0			0	0.112995	0	0	0	0	0	0	0
HMGN2P46	0	0	0	0	0	0	0	0	0			0	0	0	0	0	0	0	0	0			0	-0.119235	0	0	0	0	0	-0.21887	0
NUTM1	0	0	0	0.0525109	0	0	0	0	0			0	0	0	0	0	0	0	0	0			0	0	0	0.20837	0	0	-0.216482	0	0
RMI2	0	0	0	0	0	0	0	0	0			0	0	0	0	0	0	0	0	0			0	0	0	0.256179	0	-0.149153	-0.43402	0	0
GID4	0	0	0	0.0667755	0.050009	0	0	0	0			0	0	0	0	0	0	0	0	0			0	-0.120075	0	0.180197	0	-0.244793	-0.287145	0	0
METTL18	0	0	0	0	0	0	0	0	0			0	0	0	0	0	0	0	0	0			0	-0.163482	0	0	0	0	0	0	0
TMEM230	0	0	0	0	0	0	0	0	0			0	0	0	0	0	0	0	0	0			-0.250373	0	0	0	0	-0.180524	0	0	0
C2CD2L	0	0	0	0	0	0	0	0	0			0	0	0	0	0	0	0	0	0			0	0	0	0	-0.319865	0.196321	0	0	0
MB21D2	0	0	0	0	0	0	0.0764239	0	0			0	0	0.0514109	0.0751051	0	0.0526722	0.125085	0.0685967	0.0516272			-0.150711	0	0	0.199146	0	0	0.276297	0	0
CEP85L	0	0	0	0	0	0	0	0.0767074	0			0	0.0537068	0.0512085	0.0560814	0.0516735	0	0	0.0866047	0			-0.172778	0	0	0	0	-0.245784	0	0.0935439	0
CACNA1F	0	0	0	0	0	0	0	0	0			0	0	0	0	0	0	0	0	0			0	-0.228942	0	0	0	0	0	0	0
CAD	0	0	0	0	0	0	0	0	0			0	0	0	0	0	0	0	0	0			0	0	0	0	0	0	0	0	-0.215388
CALR	0	0	0	0	0	0	0	0	0			0	0	0	0	0	0	0	0	0			0.2915	0	0	0	0	0	0	0	0
CAMK2B	0.0625134	0	0	0	0	0	0	0.0547613	0			0	0	0	0	0	0	0	0	0			0.181774	-0.185616	0	0	-0.28667	0	0	0.161486	0
CAMK2G	0	0	0	0	0	0	0	0	0			0	0	0	0	0	0	0	0	0			0	-0.172327	0	0	0	0	-0.270056	0	0
CAPRIN1	0	0	0	0	0	0	0	0	0			0	0	0	0	0	0	0	0	0			0	-0.232976	0	0	0	0	0	0	0.144185
CARS	0	0	0	0	0	0	0	0	0			0	0	0	0	0	0	0	0	0			0	-0.14116	0	0	-0.28268	-0.209937	0	0	0
CASC5	0	0	0	0	0	0	0	0	0			0	0	0	0	0	0	0	0	0			0	-0.104411	0	0	0	0	-0.253503	0	0
CASP3	0	0	0	0	0	0	0	0	0			0	0	0	0	0	0	0	0	0			0	-0.0916533	0	0.168454	0	0	0	0	0
CASP7	0	0	0	0.0591853	0	0	0.175032	0	0			0	0.0517261	0.0567793	0.0648321	0	0.0535916	0.306901	0.0530264	0			0	0	0	0	0	0	0.338368	0	0
CAV1	0	0	0	0	0	0	0	0	0			0	0	0	0	0	0	0	0	0			0.107974	0	0	0	0	0	0	0	0
CBFA2T3	0.0798818	0	0	0.0651524	0	0.0538484	0	0	0.0830542			0	0	0	0	0	0	0	0	0			0.193099	0	0	0	0	0	-0.239058	0	0.220426
CBFB	0	0	0	0	0.056329	0	0	0	0			0	0	0	0	0	0	0	0	0			0	0	0	0	0	0	-0.175002	0	0
CBLB	0	0	0	0.0614503	0	0	0	0	0			0	0	0	0.0936148	0.0565397	0	0.0739119	0	0			-0.19422	0	0	0.193039	0	0	0.140936	0	-0.216387
CBLC	0	0	0	0	0	0	0	0	0			0	0	0	0	0	0	0	0	0			0	0	0	0	0	0.141627	0	0	0.382909
CBL	0.0710127	0	0	0	0	0	0	0	0			0.0946531	0	0.0539259	0.064669	0	0.0599199	0	0.0557292	0			0.143608	-0.098912	0	0	0	0	-0.189278	0	0
CCDC28A	0	0	0	0.0560251	0	0	0	0	0			0	0	0	0	0	0	0	0	0			0	0	0	0.222173	0	0	-0.409784	0	0
CCDC6	0	0	0	0	0	0	0	0	0			0	0	0	0	0	0	0	0	0			0	-0.142059	0	0	0	0	0	0	0
CCDC88C	0	0	0	0	0	0	0	0	0			0	0	0	0	0	0	0	0	0			0	0.102956	0	0	0	0	-0.424697	0	0
CCK	0	0	0	0.0623342	0	0	0	0	0			0	0	0	0	0	0	0	0	0			0	-4.37666	0	0.263783	0	0	0	0	0
CCL2	0	0.056449	0.0553202	0.10287	0.083761	0	0	0.0725489	0.076768			0	0.0587726	0.058182	0.128941	0.0866756	0	0	0.0721429	0.0769949			0	0.100791	0	0.26891	0	0	0	0.168187	0.163238
CCNA2	0	0	0	0	0	0	0	0	0			0	0	0	0	0	0	0	0	0			0	0	0	0	0	0	0	0	0
CCNB1IP1	0	0	0	0	0	0	0	0	0			0	0	0	0	0	0	0	0	0			0	-0.10681	0	0	0	-0.157468	0	0	-0.271049
CCNB3	0	0	0	0	0	0	0	0	0			0	0	0	0	0	0	0	0	0			0	0	0	0	0	0	0	0	0
CCND2	0	0	0	0	0	0	0	0	0			0	0	0	0	0	0	0	0	0			-0.292167	-0.214624	0	0	0	0	0	0	0
CCND3	0.0511324	0	0.0605882	0	0.0591178	0	0	0.0871229	0			0.0644852	0.051831	0.0706564	0	0.0720102	0.0629999	0	0.0930959	0			0	0	0	0	0	0	0	0.103966	0
CCNE1	0	0	0	0	0	0.0617223	0	0	0			0	0	0	0	0	0	0	0	0			0	0	0	0	0	0.189027	0	0	0
CCNG1	0	0	0	0	0	0	0	0	0			0	0	0	0	0	0	0	0	0			0	0.174548	0	0	0	-0.108806	0	-0.29327	0
CCT6B	0	0	0	0	0	0	0	0	0			0	0	0	0	0	0	0	0	0			0	0	0	0	0	0	0	0	0
CD19	0	0	0	0	0	0	0	0.0507301	0			0	0	0	0	0	0	0	0	0			0	0	0	0	-0.258149	0	-0.144892	0.136722	0
CD274	0	0	0	0	0	0	0	0	0			0	0	0	0	0	0	0	0	0			0	-0.0765326	0	0	0	0	-0.22776	-0.344827	0
CD28	0	0	0.0511295	0.0526394	0.0828348	0	0	0	0			0	0	0.0720712	0.0696584	0.116164	0	0	0	0			0	-0.111613	0	0	0.27332	0	-0.185647	-0.221619	-0.295178
CD36	0	0	0	0	0	0	0	0	0			0	0	0	0	0	0	0	0	0			0	-0.161619	0	0	0	0	-0.171495	0	-0.186157
CD44	0	0	0	0.0966778	0	0	0	0	0			0	0.0547148	0	0.225355	0	0	0	0	0			0	0	0	0.412478	0	0	-0.273417	0	0
CD58	0	0	0	0.0529055	0	0.088632	0	0	0			0.0554423	0	0	0.0716116	0	0.127816	0	0	0.0681103			0	-0.187421	0	0	0	0.23716	-0.201656	0	0
CD70	0	0	0	0	0	0	0	0	0			0	0	0	0	0	0	0	0	0			0	-0.0815283	0	0	0	0	-0.304816	0	0
CD74	0	0	0	0	0	0	0	0	0			0	0	0	0	0	0	0	0	0			-0.180679	0	-0.195717	0	0	0	-0.193872	0	0
CD79A	0	0	0	0	0	0	0	0	0			0	0	0	0	0	0	0	0	0			-0.147681	0	0	0	0	0	-0.206927	0	0
CD79B	0	0	0	0.0524099	0	0	0	0	0			0	0	0	0	0	0	0	0	0			0	-0.106493	0	0.237013	0	0	-0.157733	0	0
CD8A	0	0	0	0	0	0	0	0	0			0	0	0	0	0	0	0	0	0			0	0	0	0	0	-0.125213	-0.237454	0	0
CDC14A	0	0	0	0	0.0523206	0	0	0	0			0	0	0	0	0	0	0	0	0			0	0	0	0	0	0	-0.25798	0	-0.233528
CDC14B	0	0	0	0	0	0	0.0542808	0	0			0	0	0	0	0	0	0	0	0			0	0	0	0	0	0	0.238813	0	-0.205511
CDC25A	0	0	0	0	0	0	0	0	0			0	0	0	0	0	0	0	0	0			-0.189624	-0.355133	0	0	0	-0.303165	0	0	0
CDC25C	0.0725435	0	0	0.0640462	0	0	0	0.0799597	0.0682304			0.0829069	0.054189	0.0573303	0.0747064	0	0	0	0.0902082	0.0805528			0.145593	0	0	0.205215	0	0	-0.27559	0.126819	0.29196
CDC42	0	0	0	0	0	0	0	0.0522861	0.0586035			0	0	0	0	0	0	0	0	0			0	0	0	0	0	0	0	0.166706	0.302448
CDC73	0	0	0	0	0	0	0	0	0			0	0	0	0	0	0	0	0	0			0	-0.223016	0	0	0	0	-0.381071	0.170281	0
CDH11	0	0	0	0.0509059	0	0	0	0	0			0	0	0	0	0	0	0	0	0			0	0	0	0.228244	0	0	-0.337094	0	0
CDH1	0	0	0	0	0	0	0	0	0			0	0	0	0	0	0	0	0	0			-0.178576	-0.0627878	0	0	0	0	0.246437	0	-0.261821
CDK12	0	0	0	0.0582147	0	0	0	0	0			0	0	0	0	0	0	0	0	0			0	-0.230882	0	0.212594	0	0	0	0	0
CDK1	0	0	0	0	0	0	0	0	0.119413			0	0	0	0	0	0	0	0	0			0	0	0	0	0	0	0	0	0.468062
CDK2	0	0	0	0	0	0	0	0	0			0	0	0	0	0	0	0	0	0			0	0	0	0	0	0	0	0	0
CDK5RAP2	0	0	0	0	0	0	0	0	0			0	0	0	0	0	0	0	0	0			0	0	0	0	0	0	-0.279337	0	0
CDK6	0	0	0	0	0	0	0	0	0			0	0	0	0	0	0	0	0	0			0	-0.321067	0	0	0	0	-0.259664	0	-0.626327
CDK8	0	0	0	0	0	0	0	0.0836023	0			0.0509856	0	0	0	0	0.0556191	0	0.121121	0			0	-0.133199	0	0	0	0	0	0.193282	0
CDK9	0	0	0	0	0	0	0	0	0			0	0	0	0	0	0	0	0	0			0	0	-0.216074	0	0	0.136596	-0.376563	0.230276	0
CDKL5	0	0	0	0	0	0	0	0	0			0	0	0	0	0	0	0	0	0			0	-0.0830352	0	-0.176949	0	0.150941	0	0	0
CDKN1A	0	0	0	0	0	0	0	0	0			0	0	0	0	0	0	0	0	0			0	-1.16238	0	0	0	0.529391	-1.19365	0	0
CDKN1B	0	0	0	0	0	0	0	0	0			0	0	0	0	0	0	0	0	0			0	0	0	0	0	0	0	0	0
CDKN2A	0	0	0	0	0	0	0	0	0			0	0	0	0	0	0	0	0	0			0	0	0	0	0	0	-0.152133	0	0
CDKN2B	0	0	0	0	0	0	0	0	0			0	0	0	0	0	0	0	0	0			0	0	0	0	0	0	0	0	-0.211537
CDKN2D	0	0	0	0	0	0	0	0	0			0	0	0	0	0	0	0	0	0			0	-0.0883885	0	0	-0.273835	0	-0.204434	0.310819	0
CDX1	0	0	0	0	0	0	0	0	0			0	0	0	0	0	0	0	0	0			0	0	0	0	0	0	0	0	0
CDX2	0	0	0	0	0	0	0	0	0			0	0	0	0	0	0	0	0	0			0.238834	0	0	0	0	0	-0.220179	0	0
CEBPA	0	0	0	0	0	0	0.0959773	0	0			0	0	0.0656195	0	0.0530663	0	0.154822	0	0			0	-0.251241	0	-0.290506	0	0	0.256106	-0.150512	0
CEBPB	0	0	0	0	0	0	0	0	0			0	0	0	0	0	0	0	0	0			0	0.14492	0	0	0	0	-0.333482	0	0.14659
CEBPD	0	0	0	0.0696315	0	0	0	0	0			0	0	0	0	0	0	0	0	0			0	-0.199612	0	0.315716	0	-0.229235	-0.477522	0	0
CEBPE	0	0	0	0	0	0	0	0	0			0	0	0	0	0	0	0	0	0			0	0	0	0	0	0	0	-0.165367	0
CNTRL	0	0	0	0	0	0	0	0	0			0	0	0	0	0	0	0	0	0			0	0	0	0	0	0	0	0	0
CEP57	0	0	0	0	0	0	0.160814	0	0			0.0528038	0	0	0	0	0	0.265798	0	0			0	-0.412926	0	0	-0.527351	-0.21699	0.308682	0	0
CHCHD7	0	0	0.0657613	0.118748	0	0.07639	0	0	0.0652816			0	0	0.0715691	0.176402	0	0.0831773	0	0	0.0721446			0	-0.119373	0	0.291153	0	0.195371	0	0	0.322071
CHEK1	0	0	0	0	0	0	0	0	0			0	0	0	0	0	0	0	0	0			-0.169105	0.107985	0	0	0	0	0	0	0
CHEK2	0	0	0	0.0854865	0	0	0	0	0			0	0	0.0518606	0.129191	0	0.060034	0	0	0			0	-0.269186	0	0.224417	0	0	0	0	0
CHIC2	0.0716804	0	0	0.0995821	0.127024	0.0547379	0.0836805	0	0.095533			0.0623038	0	0	0.0981472	0.186856	0.0520096	0.0735037	0	0.0909864			0	0	0	0.199871	0.339336	0	0.16688	0	0.178361
CHL1	0	0	0	0	0	0	0	0	0.0686497			0	0	0	0	0	0	0	0	0			0	0	0	0	0	0	-0.368002	0	0.277769
CHST11	0	0	0	0	0	0	0	0	0			0	0	0	0	0	0	0	0	0			0	-0.0838742	0	0	-0.355066	0	0	0.145629	0
CHUK	0	0	0	0	0	0	0	0	0			0	0	0	0	0	0	0	0	0			-0.266314	0.247769	0	-0.227771	0	0	0	0	0
CIC	0	0.073063	0	0	0	0	0	0	0			0	0.0921196	0	0	0	0.0538012	0	0	0.056004			0	0.116119	-0.242597	0	0	0	0	0	0
CIITA	0	0	0	0	0	0	0	0	0			0	0	0	0	0	0	0	0	0			0	0	0.252345	0	0	0	-0.467812	0	0
CIRH1A	0	0	0	0.0713911	0.0675739	0	0	0	0			0	0	0	0	0	0	0	0	0			0	-0.123245	0	0.265981	0	0.149009	0	0	0
CIT	0	0	0	0	0	0	0	0.0932511	0			0	0.0540634	0	0.0567743	0	0	0	0.118034	0			-0.417078	0	0	0	0	0	0	0.157264	0
CKB	0.059134	0	0	0	0	0	0	0	0			0	0	0	0	0	0	0	0	0			0.321008	0.177237	0	0	0	0	0	0	0
CLP1	0	0	0.0594585	0.0723296	0.0854424	0	0.105398	0.0739466	0			0	0	0.0602448	0.0720173	0.0906057	0.0505991	0.142757	0.0738896	0.0507161			0	-0.112846	0	0	0	0	0.263128	0.143406	0
CLTCL1	0	0.072203	0.0519815	0	0.0919727	0.0571367	0.138823	0.0611301	0			0	0.0683431	0.0540475	0	0.0953135	0.057189	0.264657	0.0597715	0			-0.188746	0.200535	0	0	0	0	0.35651	0	0
CMKLR1	0	0	0.0692097	0.0767252	0	0.0853335	0.0925062	0.0597904	0			0	0	0.0724216	0.0814007	0	0.0925313	0.114093	0.0637197	0			0	0	0	0.169434	0	0.144074	0.29441	0	-0.259333
CNTN1	0	0	0	0	0	0	0	0	0			0	0	0	0	0	0	0	0	0			0.146626	0	0	-0.177863	0	0	-0.394002	0	0
COG5	0	0	0	0	0	0	0	0	0			0	0	0	0	0	0	0	0	0			0	0	0	0	0	-0.165598	0	0	0
COL11A1	0	0	0	0	0	0	0.0725218	0	0			0	0	0.0548736	0	0.0577923	0	0.122429	0.0697975	0			-0.142114	0	0	0	0	0	0.25896	0	0
COL1A2	0	0	0	0.0642721	0.0701704	0	0	0	0.127717			0	0	0	0	0	0	0	0	0			0	0	0	0	0	-0.105509	0	0	0.296847
COL3A1	0	0	0	0	0	0	0	0	0			0	0	0	0	0	0	0	0	0			0	0	0	0	0	0	-0.447306	0	0
COL6A3	0	0	0	0	0	0	0.0664723	0	0			0	0	0.0543757	0	0.0507657	0	0.106478	0	0			-0.128961	-0.221613	0	-0.465988	0	0	0.192172	0	0
COL9A3	0	0	0	0	0	0	0	0	0			0	0	0	0	0	0	0	0	0			0	0	-0.201443	0	0	0	0	0	0
COMMD1	0	0	0	0	0	0.0713232	0	0	0			0.0645456	0.0562381	0.0620552	0	0	0.110323	0	0	0			0	0	0	0	0	0.211162	0	-0.259956	0
COX6C	0.101493	0	0	0.0619616	0	0.0642558	0	0	0			0.1354	0	0	0.0752986	0	0.0785814	0	0.0570607	0			0.214722	-0.154007	0	0	-0.244789	0.215776	-0.369017	0	0
CPNE1	0	0	0	0	0	0	0.0943432	0	0			0	0.0515373	0.0577515	0	0.0548148	0	0.147977	0.0717637	0			-0.274608	0	0	0	0	0	0.228756	0.141623	0
CPSF6	0	0	0	0	0	0	0	0	0			0	0	0	0	0	0	0	0	0			-0.115911	0	0	0	0	0	0	0	0
CRADD	0	0	0	0	0	0	0	0	0			0	0	0	0	0	0	0	0	0			0	0	0	0	0	-0.165617	0	0	0
CRKL	0	0	0.0585231	0.116202	0	0	0	0	0			0	0	0.0738706	0.173013	0	0	0.0512663	0.0621902	0			0	0	0	0.26679	-0.382925	0	0	0	0
CRLF2	0	0	0	0	0.0833799	0.053082	0	0	0.0507514			0	0	0	0.0561975	0.106277	0.0762492	0	0	0.0736125			0	-0.046766	0	0	0.165908	0.259562	0	-0.19724	0.220477
CRTC3	0	0	0	0	0	0	0	0	0			0	0	0	0	0	0	0	0	0			0	0	0	0	-0.373848	0	0	0	0
CSF1R	0	0	0	0	0	0	0	0	0			0.0596388	0.0618191	0	0.0941774	0.0522614	0	0	0	0.0553327			0	0.113734	0	0.197174	0	0	0	0	0
CSF1	0	0	0	0	0	0	0	0	0			0	0	0	0	0	0	0	0	0			0	0.13235	0	0	0	0	0	0	0
CSF3R	0	0	0	0	0	0	0	0.0612819	0			0	0	0	0	0	0	0	0	0			0.154415	0	0	0	-0.39638	0	0	0.228758	-0.277549
CSNK1G2	0.0775497	0	0	0.107327	0	0.0592168	0	0	0.0824021			0.0824269	0	0	0.148988	0.0548639	0.0651821	0	0	0.0914936			0.132328	0	0	0.278522	0	0.16504	-0.244905	0	0.228314
CSNK2A1	0	0	0	0.0779925	0	0	0	0.104951	0			0	0	0	0	0	0	0	0	0			-0.250497	-0.325669	0	0.21291	-0.27039	-0.262098	0	0.159358	0
CTCF	0	0	0	0	0	0	0.176801	0	0.0517824			0	0.0552411	0	0	0	0	0.412902	0.0566631	0.062867			-0.234501	0	0	0	0	0	0.454201	0	0
CTNNA1	0	0	0	0	0	0	0	0	0.113471			0	0	0	0	0	0	0	0	0			0	-0.077798	0	-0.207335	-0.263161	-0.208043	0	0	0.32342
CTNNB1	0	0	0	0	0	0	0	0	0			0	0	0	0	0	0	0	0	0			0	0	0	0	0	0.218909	0	0	0
CTNND2	0	0	0	0	0	0	0	0	0			0	0	0	0	0	0	0	0	0			0	0.0358954	0	0	0	0	-0.163412	0	0
CTRB1	0.07878	0.0595186	0.0930977	0	0.0879768	0.109574	0	0	0			0.0754443	0.0587669	0.0973766	0.0507747	0.0884952	0.136127	0	0	0			0.195634	0.0737147	0.203291	0	0	0.24357	-0.277791	0	0
CXCR4	0	0	0	0.0521987	0	0	0	0	0			0.0590171	0.055379	0.0592893	0.0830441	0.052484	0.0509019	0	0.0566569	0.0640505			0	0.981078	0	0.143093	0	0	-0.347433	0	0
ACKR3	0	0	0	0	0	0	0	0	0			0	0	0	0	0	0	0	0	0			0.110456	0	0	0	0	0	0	0	0
CYP1B1	0	0	0	0	0	0	0.096806	0	0			0	0	0	0	0	0	0	0	0			-0.125878	-0.066131	-0.283855	0	0	-0.172945	0.697582	0	0
CYP2C19	0	0	0	0	0	0	0.0931595	0	0			0	0	0	0.0526546	0.0594442	0.0563234	0.165341	0	0			0	0	0	0	0	0	0.25058	0	0
SPECC1	0	0	0	0	0	0	0	0	0			0	0	0	0	0	0	0	0	0			-0.269212	-0.120915	0	0	0	-0.253024	0	0	0
DACH1	0	0	0	0	0	0	0	0	0			0	0	0	0	0	0	0	0	0			0	0	0	0	0	0	0	0	0
DACH2	0	0	0	0	0	0	0	0	0			0	0	0	0	0	0	0	0	0			0	0	0	-0.276986	0	0	-0.272726	0	0
DAXX	0	0	0	0	0	0	0	0	0			0	0	0	0	0	0	0	0	0			-0.172306	0	0	-0.365303	0	0	0	0	-0.150162
DCLK2	0	0	0	0	0	0	0	0	0.0780722			0	0	0	0	0	0	0	0	0			0.118463	-0.14396	0	0	0	0	0	0	0.424408
DCN	0	0	0	0.0590193	0	0	0	0	0			0	0	0	0	0	0	0	0	0			0	-0.235585	0	0.213389	0	0	0	-0.183082	0
DDR2	0	0	0	0	0	0	0.0617808	0	0			0	0	0	0	0	0	0	0	0			0	0	0	0	0	0	0.239992	0	0
DDX10	0	0	0	0	0	0	0	0	0			0	0	0	0	0	0	0	0	0			0	0	0	0	0	-0.152966	0	0	0
DDX5	0	0	0	0	0	0	0	0	0			0	0	0	0	0	0	0	0	0			0	-0.126015	0	0	0	0	-0.321918	0	0
DDX6	0	0	0	0	0	0	0	0	0			0	0	0	0	0	0	0	0	0			0	0	0	0	0	0	-0.224032	0	0
DEK	0	0	0	0	0	0	0	0	0			0	0	0	0	0	0	0	0	0			0	-0.161031	0	0	0	0	0.138728	-0.155302	0
DGKB	0.0530871	0	0	0	0	0	0	0	0			0	0	0	0	0	0	0	0	0			0.167391	0	0	0	0	-0.107133	-0.265551	0	0
DGKZ	0.0609693	0	0	0	0.0639292	0	0	0	0.0636649			0	0	0	0	0	0	0	0	0			0.309174	-0.102944	0	0	0	0	0	0	0.42336
DIRAS3	0	0	0	0	0	0	0	0	0			0	0	0	0	0	0	0	0	0			0.241101	-0.239038	0	0	0	0.127435	0	0	0
DKK1	0.054045	0	0	0	0.058416	0	0	0	0.116542			0	0	0	0	0	0	0	0	0			0.161955	0	0	0	0	-0.129297	-0.145032	0	0.431232
DKK2	0	0	0	0	0	0	0	0	0			0	0	0	0	0	0	0	0	0			-0.156455	0	0	0	0	0	0	0	-0.212962
DKK4	0	0	0	0	0	0	0	0	0			0	0	0	0	0	0	0	0	0			-0.320219	0	0	0	0	0	-0.177799	0	-0.229554
DLEC1	0	0	0	0	0	0	0	0	0			0	0	0	0	0	0	0	0	0			0	-0.103329	0	0	0	0	0	0	0
DLL1	0	0	0	0	0	0	0	0	0			0	0	0	0	0	0	0	0	0			0	-0.206475	0	0	0	0	-0.538184	-0.167594	0
DLL3	0	0	0	0	0.0667648	0	0	0	0			0	0	0	0	0.0890536	0	0	0	0			-0.215358	0	0	0	0	0	0	-0.186499	0
DLL4	0	0	0	0.0541615	0	0	0	0	0			0	0	0	0	0	0	0	0	0			0	0.0791236	0	0.210315	-0.256871	-0.154648	0	0	0
DMRT1	0.0853346	0	0	0	0	0	0	0	0			0.111168	0.0538926	0	0.0513692	0	0.0575276	0	0	0			0.143924	0	0	0	0	0	0	0	0
DMRTA2	0	0	0	0	0	0	0	0	0.0555462			0	0	0	0	0	0	0	0	0			0	0	-0.206114	0	0	0	-0.214308	0	0.194697
DNAJB1	0	0	0	0	0	0	0	0	0			0	0	0	0	0	0	0	0	0			0.217109	-0.264034	0	0	0	0	0	-0.177477	0
DNM1	0	0	0	0	0.0596495	0	0	0.0709813	0.0667897			0	0	0	0	0	0	0	0	0			0	0.0984659	0	0	0	-0.175461	-0.29651	0.177939	0.21144
DNM2	0	0	0	0	0	0	0	0	0			0	0	0	0	0	0	0	0	0			0	0	0	0	0	0	-0.261142	0	0
DNM3	0	0	0	0	0	0	0	0	0			0	0	0	0	0	0	0	0	0			0	0	0	0	-0.257562	0	0	0	0
DNMT1	0	0	0	0	0	0	0	0	0			0	0	0	0	0	0	0	0	0			0	0.107472	0	0	0	0	0	0	0
DNMT3A	0	0	0	0	0	0	0	0	0			0	0.0807237	0	0.0516452	0.0565946	0.0562068	0	0.0538719	0.0530901			0	0.124601	0	0	0	0	0	0	0
DOCK1	0	0	0	0	0	0	0	0	0			0	0	0	0	0	0	0	0	0			-0.178696	-0.12498	0	0	0	0	0	0	0
DOT1L	0	0	0.0580286	0	0.0537616	0.0599795	0.0966672	0	0.0770086			0.0569963	0.0509913	0.0633822	0	0.0600239	0.0651972	0.135951	0	0.0853056			0	0	0	0	0	0.132558	0.288271	0	0.189912
DPM1	0	0	0	0	0	0	0	0	0			0	0	0	0	0	0	0	0	0			0	-0.183551	0	0	0	-0.147674	0	0	0
DST	0	0	0	0.0882532	0	0	0	0	0			0.0688321	0	0.0548852	0.159783	0	0	0	0	0.0596459			0.1547	-0.0976473	0	0.34845	0	0	0	0	0
DTX1	0	0	0	0	0	0	0	0	0			0	0	0	0	0	0	0	0	0			0.130351	0.126404	0	0	0	0	0	0	0
DTX4	0	0	0	0.0619598	0.0771284	0	0	0	0			0	0	0	0	0	0	0	0	0			-0.228042	-0.103618	0	0.1802	0.307767	0	0	-0.160513	0
DUSP26	0	0	0	0.0839041	0.0699212	0	0	0	0			0	0	0	0	0	0	0	0	0			0	-0.115549	0	0.238484	0	0	-0.229717	0	0
DUSP2	0	0.0715231	0	0	0	0	0	0	0			0	0	0	0	0	0	0	0	0			0	0.315227	0	0	0	0	0	0	-0.254418
DUSP9	0	0	0	0	0	0	0	0	0			0	0	0	0	0	0	0	0	0			0	0	-0.194119	0	0	0	0	0	0
E2F1	0	0	0	0.0899014	0.0516262	0	0	0	0.0635252			0	0	0.0556953	0.143268	0.0634558	0.0581931	0.056276	0.0517176	0.0756109			0	0	0	0.323126	0	0	0	0	0.153527
EBF1	0	0	0	0	0	0	0	0	0			0	0	0	0	0	0	0	0	0			0.165031	-0.170277	0	0	0	0.0988894	-0.335878	0	0
EDNRB	0	0	0	0	0	0	0	0	0			0	0	0	0	0	0	0	0	0			0	-0.0938855	0	0	0	0.135409	-0.288306	0	0
EED	0	0	0	0	0	0	0	0	0			0.0542025	0	0.0520029	0.0764358	0.0535385	0.0527031	0	0	0.0548128			0	-0.176734	0	0.103601	0	0	0	0	0
EGFR	0	0	0	0	0	0	0	0	0			0	0	0	0	0	0	0	0	0			-0.224032	0	0	0	0	0	-0.253718	0	0
EGF	0	0	0	0	0	0	0	0	0			0	0	0	0	0	0	0	0	0			0	-0.13171	0	0	0	0	0	0	-0.192765
EGR1	0	0	0	0	0	0	0	0.086665	0			0	0	0	0	0	0	0.0522609	0.117223	0.0632499			0	0	0	0	0	0	0	0.16368	0
EGR2	0	0	0	0	0	0	0	0	0			0	0	0	0	0	0	0	0	0			-0.197775	0.17643	0	-0.258444	0	-0.177193	-0.155351	0	0
EGR4	0	0	0	0	0	0	0	0	0			0	0	0	0	0	0	0	0	0			0	0	0	0	0	0	0	0	0
EIF4E	0	0	0	0	0	0	0	0	0			0	0	0	0	0	0	0	0	0			0	-0.167897	0.171661	0	0	0	0	0	0
ELF4	0	0	0.055358	0.0642787	0	0.0623821	0	0	0			0	0	0	0	0	0	0	0	0			0	0	0	0.180613	0	0.204926	0	0	0
ELK4	0	0	0	0	0	0	0	0	0			0	0	0	0	0	0	0	0	0			0	-0.116937	0	0	-0.276579	0	-0.256539	0	0
ELL	0	0	0	0	0	0	0	0	0.0994256			0	0	0	0	0	0	0	0	0			0	0	0	0	0	0	0	0	0.416139
ELN	0.0530773	0	0	0	0	0	0	0	0			0	0	0	0	0	0	0	0	0			0.145024	0.0804262	0	0	0	-0.14446	-0.248771	0	0
ELOVL2	0	0	0	0	0	0	0	0	0			0	0	0	0	0	0	0	0	0			0	0	0	0	0	0	0	0	0.170865
ELP2	0	0	0	0	0	0.0589412	0	0	0			0	0	0	0	0	0	0	0	0			0	0	0	0	0	0.351051	0	0	0
EML1	0	0.0513416	0	0	0	0	0	0	0			0	0	0	0	0	0	0	0	0			0	0.183538	0	0	0	0	0	0	-0.302109
EML4	0	0	0	0	0	0	0	0	0			0	0	0	0	0	0	0	0	0			0.108989	0	0	0	-0.250273	0	0	0	0
ENPP2	0	0	0	0	0	0	0	0	0			0	0	0	0	0	0	0	0	0			0	0	0	0	0	0	-0.246241	0	0
EP300	0	0	0	0	0	0	0	0	0			0	0	0	0	0	0	0	0	0			-0.121393	-0.0914241	0	0.200027	0	-0.16675	-0.208604	0	0
EPC1	0	0	0	0	0	0	0	0	0			0	0	0	0	0	0	0	0	0			0	0	0	0	0	0	0.166301	0	-0.205983
EPCAM	0	0	0	0	0	0	0	0	0			0	0	0	0	0	0	0	0	0			0	0.187253	0	0	-0.251364	0	0	0	0
EPHA2	0	0	0	0.0646289	0	0	0	0	0			0	0	0	0	0	0	0	0	0			0.151781	-0.136894	0	0.233637	0	0.143113	-0.27177	0	0
EPHA3	0	0	0	0	0	0	0	0	0			0	0	0	0	0	0	0	0	0			0	0.122631	0	0	0	0	-0.266918	0.19642	0
EPHA7	0	0	0	0	0	0	0	0	0			0	0	0	0	0	0	0	0	0			0	0	0	0	0	-0.144249	-0.203646	0	0
EPHB1	0	0	0	0	0	0	0	0	0			0	0	0	0	0	0	0	0	0			0	-0.253992	0	0	0	0	-0.322968	0	0
EPHB6	0	0	0	0	0.0545274	0	0	0	0			0	0	0	0	0	0	0	0	0			0	0	0	0	0	0	-0.300674	0	0
EPOR	0	0	0	0	0	0	0.113632	0	0			0	0.0526722	0	0.0510192	0	0	0.209843	0	0.0518176			0	0	0	0	0	0	0.275564	0	0
EPO	0	0	0	0	0	0	0	0	0			0	0	0	0	0	0	0	0	0			0	0	0	0	0	0	-0.212597	0	0
EPS15	0.0722051	0	0	0	0	0	0	0	0.0609615			0.104857	0.0551312	0	0	0	0.0583525	0	0	0.0979825			0.180086	0	0	0	0	0	-0.636623	0	0.280409
ERBB2	0	0	0	0	0	0	0	0	0			0	0	0	0	0	0	0	0	0			-0.189485	-0.216808	0	-0.202248	0	0	0	-0.453469	0
ERBB3	0	0.0780979	0	0	0	0	0	0.0754091	0			0	0	0	0	0	0	0	0	0			0	0.260197	0	0	-0.222796	-0.154065	0	0.158834	0
ERBB4	0	0	0	0	0	0	0	0	0			0	0	0	0	0	0	0	0	0			0	-0.106392	0	0	0	0	0	0	0
ERC1	0	0	0	0	0	0	0.0766309	0	0			0.0556512	0	0	0	0	0	0.114726	0	0			0	0	0	-0.230741	0	-0.190396	0.22513	0	-0.214545
ERCC1	0	0	0.0574687	0	0	0	0	0.0918888	0			0	0	0.0789113	0.0531518	0	0	0	0.117189	0.0537905			-0.166911	0	0	0	0	0	-0.201442	0.151948	0
ERCC3	0	0	0	0	0	0	0	0	0			0	0	0	0	0	0	0	0	0			0	0	0	-0.170979	0	0	0	0	0
ERCC5	0	0	0	0	0	0	0	0	0			0	0	0	0	0	0	0	0	0			0	-0.163604	0	0	0	0	0	0	0
ERCC6	0.058345	0	0	0	0.0667192	0	0	0	0			0.0771536	0	0.0601936	0.0516187	0.0925142	0	0	0.0512689	0			0.113379	-0.0633079	0	0	0	0	-0.303893	0	0
ERG	0	0	0	0.0597887	0.0591897	0	0	0	0.0547769			0	0	0	0	0	0	0	0	0			0	0	0	0.201418	0	0	-0.155822	0	0.367849
ERLIN2	0	0	0	0	0	0	0	0	0			0	0	0	0	0	0	0	0	0			-0.154627	0	0	0	0	-0.185254	0	0	0
ESR1	0	0	0	0	0	0	0	0	0			0	0	0	0	0	0	0	0	0			0	0.156231	0	0	0	0	-0.228881	0	0
ETS1	0	0	0	0	0	0	0	0	0			0	0	0	0	0	0	0	0	0			0	-0.115611	0	0	0	-6.17363	0	0	0
ETS2	0	0.0993155	0	0.109617	0	0	0	0	0.121674			0.0556473	0.109772	0	0.134548	0	0	0	0	0.207433			0	0.223682	0	0.260591	0	0	0	0	0.41042
ETV1	0	0	0	0	0	0	0	0	0			0	0	0	0	0	0	0	0	0			0.126144	-0.151918	0	0	0	0	-0.216323	-0.199755	0
ETV4	0	0	0	0.121234	0	0	0	0.09829	0			0.0546575	0.0555911	0.0526425	0.161504	0	0.0579547	0	0.111086	0.0548527			0	0	0	0.218099	0	0	0	0.146822	0
ETV5	0	0	0	0	0	0	0	0	0			0	0	0	0	0	0	0	0	0			0	0.116509	-0.255499	0	0	0	-0.23283	-0.161973	0
ETV6	0.117439	0.0891739	0.108867	0.173897	0.152495	0	0.104438	0.097047	0.11804			0.0835266	0	0.0582196	0.219968	0.161133	0	0.0651346	0.0515216	0.0724772			0.131148	0	0	0.286904	0.28298	0	0	0	0
EWSR1	0	0	0	0	0	0	0	0	0.0697508			0	0	0	0	0	0	0	0	0			0	0	0	0	0	0	-0.379292	0	0.310273
EXOSC6	0	0	0	0	0	0	0.0708853	0	0			0.0527585	0.0504871	0	0	0	0	0.108087	0	0			0	0	0	-0.531611	0	0	0.216165	0	0
EXT1	0	0	0	0	0	0	0	0	0			0	0	0	0	0	0	0	0	0			0	0	0	0.179776	0	0.110926	-0.176138	0	0
EXT2	0	0.0799443	0	0	0	0	0.0801177	0	0			0	0.0937693	0	0.0557497	0	0.0547218	0.111421	0	0			0	0.124041	0	0	0	0	0.226794	0	0
EYA1	0	0	0	0	0.0595247	0	0	0	0.0591898			0	0	0	0	0	0	0	0	0			0	0.0456415	0	0	0	0	0	0	0.20089
EYA2	0	0	0	0.103934	0	0	0	0	0			0	0	0	0.138994	0.0503553	0	0	0.0545474	0.0581919			0	-0.118796	0	0.190138	0	0	0	0	0
EZH2	0	0	0	0	0	0	0.0954568	0	0			0	0	0	0.0648872	0	0	0.142442	0	0.0544489			-0.200268	-0.0920044	0	0	0	-0.277796	0.220355	0	0
FAF1	0	0.0584179	0	0	0	0	0	0	0.0670247			0	0	0	0	0	0	0	0	0			0	0.237546	0	0	0	0	0	0	0.129626
AMER1	0	0	0	0	0	0	0	0	0			0	0	0	0	0	0	0	0	0			0	-0.301675	0	0	0	0	0	0	0
FAM127C	0	0	0	0.0707727	0	0	0	0.0894968	0			0	0	0.0638237	0.0861453	0.0584016	0	0	0.110518	0			-0.279285	-0.0731985	0	0.165126	0	0	0	0.167683	0
FAM19A2	0	0	0	0	0	0	0	0.0890769	0			0	0.0512797	0.0551237	0	0	0	0	0.106838	0			0	0	0	0	0	0	0	0.124175	0
FAM19A5	0	0	0	0	0	0	0	0	0			0	0	0	0	0	0	0	0	0			0	0	0	0	0	0	-0.274493	0	0
NUTM2A	0	0	0	0	0	0	0	0	0			0	0	0	0	0	0	0	0	0			0	0	0	0	0	0	0	-0.170046	0
FAM46C	0	0	0	0	0.064512	0	0	0	0			0	0	0	0	0	0	0	0	0			0.208389	0	0	0	0.348799	0	0	0	0
FANCC	0	0	0	0	0	0	0	0	0			0	0	0	0	0	0	0	0	0			0	-0.400268	0	0.170334	0	0	-0.318743	0	-0.372408
FANCD2	0	0	0	0	0	0	0	0	0			0	0	0	0	0	0	0	0	0			-0.182308	-0.0950466	0	0.186775	0	-0.15033	-0.314611	0	0
FANCE	0	0	0	0	0	0	0	0	0			0	0.0527698	0	0.0718833	0	0	0	0.0606176	0.0501815			0	0	0	0	0	0	0	0	0
FANCF	0	0	0	0	0	0	0	0	0			0	0	0	0	0	0	0	0	0			-0.147728	0	0	0	0	0	0	0	0
FANCG	0	0	0	0	0	0	0	0	0			0	0	0	0	0	0	0	0	0			0	-0.1718	0	0	0	0	0	0.146651	0
FANCI	0	0	0	0	0	0	0.0742551	0	0			0.0500317	0.055235	0.0665207	0.0511829	0.055191	0.065502	0.136	0	0			0	0	0	0	0	0.118053	0.295079	0	0
FANCL	0	0	0	0	0.0873217	0	0	0	0			0.0554452	0	0	0.052562	0.168575	0.0519353	0	0	0.0554735			0	0	0	0	0.329293	0	-0.255728	-0.268964	0
FANCM	0	0	0	0	0	0	0	0	0			0	0	0	0	0	0	0	0	0			0	0	0	0	0	0	0	0	-0.153519
FASLG	0	0	0	0	0	0	0	0	0			0	0	0	0	0	0	0	0	0			0.589852	0.071763	0	0	0	0.158388	-1.69975	0	0
FAS	0	0	0	0	0.0930174	0	0	0	0			0.0500594	0	0.0595443	0	0.180658	0	0	0	0			0	-0.207995	0	0	0.360416	-0.131451	-0.174947	-0.166976	0
FBN2	0	0	0	0.0632941	0	0	0	0	0			0	0	0	0.105059	0	0.0612001	0	0.0520951	0.0689702			0	-0.258718	-0.276894	0.234497	0	0	0	0	0
FBXW7	0	0	0	0.0684202	0	0.0500031	0	0	0			0	0	0	0	0	0	0	0	0			0	0	0	0.233463	-0.312816	0.106801	0	0	-0.197483
FCGR2B	0	0	0	0	0.0664801	0	0	0	0			0	0	0	0	0	0	0	0	0			-0.138209	-0.225374	0	0	0	0	0	0	-0.218356
FCRL4	0	0	0	0	0	0	0	0	0			0	0	0	0	0	0	0	0	0			0	0	0	0	-0.266952	0	-0.310762	-0.192986	0
FEN1	0	0	0	0	0.0737888	0	0	0	0			0	0	0	0	0.0939675	0	0	0	0			0	-0.127611	0	0	0	-0.208629	-0.42332	0	0
FEV	0	0.0661154	0	0	0	0	0	0	0			0	0.0859457	0	0	0	0	0	0.052636	0			-0.15772	0.12135	0	-0.179306	0	0	0	0	-0.312092
FGF13	0	0	0	0	0	0	0	0	0			0.0638464	0	0.0503342	0.0761069	0	0	0.052441	0	0			0	-0.15435	0	0.120747	0	0	0	0	-0.161869
FGF14	0	0	0	0	0	0	0	0	0			0	0	0	0	0	0	0	0	0			0.250392	0.161573	0	0	0	0	0	0	0
FGF19	0	0	0	0	0	0	0	0	0			0	0	0	0	0	0	0	0	0			0	0.0907719	0	0.148205	0	-0.18062	-0.389615	0	0
FGF1	0.0710892	0	0	0.0883478	0.0553822	0	0.12473	0	0.0633753			0.0690192	0.0516214	0	0.0943054	0.0563874	0.0518351	0.265783	0	0.0620478			0.160398	0	0	0.31418	0	0	0.404016	0	0
FGF23	0	0	0	0	0	0	0	0	0			0	0	0	0	0	0	0	0	0			0	0	0	0	0	-0.218753	-0.316282	0	0
FGF2	0	0	0	0	0	0	0	0	0			0	0	0	0	0	0	0	0	0			0	0	0	0	0	0	0	0	0
FGF3	0	0	0	0	0	0	0	0	0.0569963			0	0	0	0	0	0	0	0	0			0	0	0	0	0	0	0	0	0.16538
FGF4	0.0697581	0	0	0	0	0	0	0.0586129	0			0	0	0	0	0	0	0	0	0			0.293254	0.0990517	0	0	0	0	0	0.125979	0
FGF6	0	0	0	0.0976882	0	0.0695358	0	0	0			0	0	0	0	0	0	0	0	0			0	0	0	0.255597	0	0.207415	-0.353566	0	0
FGF8	0	0	0	0	0	0	0	0	0.0736307			0	0	0	0	0	0	0	0	0			0	0	0	0	0	0	-0.334856	0	0.266186
FGF9	0.0846646	0	0	0.0874676	0	0	0	0	0			0.109322	0.0582697	0	0.119487	0	0	0	0.0500131	0.0583966			0.195498	0.0865908	0	0.23932	0	0	-0.226196	0	0
FGFR1OP2	0	0.0550061	0	0	0.0650222	0	0.0621985	0	0			0	0	0	0	0	0	0	0	0			0	0.14259	0	0	0	0	0.233299	-0.188809	0
FGFR1OP	0	0	0	0	0	0	0	0	0.0904806			0	0	0	0	0	0	0	0	0			-0.208522	0.0722361	0	0	0	-0.156799	0	0	0.135291
FGFR2	0	0	0	0	0	0	0	0	0			0	0	0	0	0	0	0	0	0			0	0	0	0	0	0	0	0	0
FGFR3	0	0	0	0	0	0	0	0	0			0	0	0	0	0	0	0	0	0			0	-0.4818	0	0	0	0	0	0	-0.561014
FGFR4	0.104923	0.0516719	0	0.0837929	0	0	0	0.0620203	0			0.156675	0.0607083	0	0.0992187	0	0	0	0.0692312	0.0568089			0.306078	0.0871969	0	0.249529	0	0	0	0	0
FHL2	0	0	0	0	0	0	0	0	0.105358			0	0	0	0	0	0	0	0	0			0	-0.0875796	0	0	0	0	0	0	0.165334
FH	0	0	0	0	0	0	0	0	0			0	0	0	0	0	0	0	0	0			0	0.065001	0	0	0	0	-0.261543	0	0
FIGF	0	0	0	0	0	0	0	0	0			0	0	0	0	0	0	0	0	0			0	0	0.217693	0	0	-0.118577	-0.250805	0	0
FLCN	0	0	0	0	0	0	0	0	0			0	0	0	0	0	0	0	0	0			0.180618	-0.35351	0	0	0	-0.148724	0	0	0
FLNC	0	0	0	0	0	0	0	0	0			0	0	0	0	0	0	0	0	0			0	0	0	0	0	0	0	0	0
FLT1	0	0	0	0	0	0	0	0	0			0	0	0	0	0	0	0	0	0			-0.162613	-0.206857	0	-0.265291	-0.299092	0	-0.151152	0	0
FLT3LG	0	0	0	0	0	0	0.0610395	0	0			0	0	0	0	0	0	0	0	0			0	0	0	0	0	-0.213406	0.259261	0	0
FLT3	0	0	0	0.0563932	0	0	0	0.075283	0			0	0	0	0	0	0	0	0	0			0	0	0	0.135641	0	0	0	0.179669	-0.274479
FLT4	0	0	0	0	0	0	0	0	0			0	0	0	0	0	0	0	0	0			0	-0.15525	0	0	0	-0.167889	0	0	-0.283564
FLYWCH1	0	0	0	0	0	0	0	0	0			0	0	0	0	0	0	0	0	0			0	0.450913	0	0	0	-0.259099	-0.351262	0	0
FNBP1	0	0	0	0	0	0	0	0	0			0	0	0	0	0	0	0	0	0			0	-0.146904	0	-0.277502	-0.366378	0	0	0	0
FOSB	0	0	0	0	0	0	0.128697	0	0			0	0.052159	0.050057	0	0	0	0.255677	0	0			-0.211742	0	0	-0.154406	0	0	0.320673	0	-0.186651
FOSL1	0	0	0	0	0	0	0	0	0			0	0	0	0	0	0	0	0	0			-0.198668	0.108121	0	0	0	0	0	0	0
FOS	0	0	0	0	0.0544238	0	0	0	0			0	0	0	0	0	0	0	0	0			0	0.149952	0	0	0	0	-0.225376	0	0
FOXL2	0	0	0	0	0	0	0	0	0			0	0	0	0	0	0	0	0	0			-0.149743	0.101656	0	0	0	-0.225674	-0.266715	0	0
FOXO1	0	0.0664293	0	0.0721301	0.0883456	0.0963758	0	0	0			0.0527558	0.0716713	0	0.0771523	0.103514	0.122121	0	0	0			0	0.142611	0	0.134802	0	0.258132	-0.269812	0	-0.248202
FOXO3	0	0	0	0.0528253	0.0594479	0	0	0	0			0	0.0565716	0.0589091	0.0706871	0.0835082	0	0	0	0.0630616			0	0	0	0	0	-0.15093	0	0	0
FOXO4	0	0	0	0.0954843	0.0611126	0	0.121127	0	0			0	0	0	0.117579	0.0659174	0.0525063	0.169159	0.0547044	0.0516511			0	0	0	0.223187	0	0	0.214524	0	0
FRK	0	0	0	0	0	0	0	0	0			0	0	0	0	0	0	0	0	0			0	-0.154491	-0.232078	0	0	0	-0.225007	-0.186452	0
FRMPD4	0	0	0	0	0	0	0	0	0			0	0	0	0	0	0	0	0	0			0	0.0929224	0	0.124875	0	0	0	-0.210147	3.84189
FRS2	0	0	0	0	0	0	0	0	0			0	0	0	0	0	0	0	0	0			0.243413	-0.322399	0	0	0	0	0	0	0
FRYL	0	0	0	0	0	0	0	0	0			0	0	0	0	0	0	0	0	0			0.207343	0.0538283	0	0	0	0	-0.308883	0	-0.221925
FSTL3	0	0	0	0	0	0	0	0	0			0	0	0	0	0	0	0	0	0			0	0	0	0	0	-0.115874	-0.234365	0	0
FUS	0	0	0	0.0790561	0.0693385	0.0852443	0	0	0.069556			0	0	0	0.0883801	0.0779409	0.0974776	0	0.051897	0.080103			0	0	0	0.131823	0	0.141079	0	0	0.272866
FUT1	0.0546111	0	0	0	0	0	0.103316	0	0			0.0735056	0.050432	0.0500024	0.0553865	0	0	0.176715	0.0537799	0.0569902			0.172585	0	0	0	0	0	0.240464	0	0
FZD10	0	0	0	0	0	0	0	0	0			0	0	0	0	0	0	0	0	0			0	0	0	0	0	0	-0.240143	0	0
FZD2	0	0	0	0	0	0	0.0690662	0	0			0	0	0	0	0	0	0	0	0			0	0	0	-0.264906	0	0	0.290594	0	0
FZD3	0.114299	0.053661	0	0.0742245	0	0.117387	0	0	0			0.131569	0.0583204	0	0.074607	0	0.157995	0	0	0.0526015			0.169767	0.105007	0	0	0	0.250627	0	-0.180235	0
FZD6	0	0	0	0.0595313	0	0	0	0	0			0.0523017	0	0	0.0996241	0	0	0	0	0.0512755			0	0	0	0.214736	0	0	-0.196494	0	0
FZD7	0	0	0	0	0	0	0	0	0			0	0	0	0	0	0	0	0	0			0	0	0	0	0	0	-0.413318	0	0
FZD8	0	0.0630751	0	0.0710817	0	0	0	0	0			0	0.0905704	0	0.100436	0	0.0504637	0	0	0			0	0.169003	0	0.173751	0	0	-0.293482	0	0
GAB1	0	0	0	0	0	0	0	0	0			0	0	0	0	0	0	0	0	0			0	0	0	0	0	-0.112838	-0.262928	0	0
GANAB	0	0	0	0	0	0	0	0	0			0	0	0	0	0	0	0	0	0			0	-0.114182	-0.249489	0	0	0	0	-0.238649	0
GAS1	0.0504102	0.0680425	0	0	0	0	0	0	0			0	0	0	0	0	0	0	0	0			0.203625	0.241261	0	0	0	0	0	0	0
GAS5	0	0	0	0	0	0	0	0	0			0	0	0	0	0	0	0	0	0			0	0	0	-0.405462	0	0	0.244482	0	0
GAS7	0	0	0	0	0	0	0	0	0			0	0	0	0	0	0	0	0	0			0	-0.113432	0	0	-0.364027	-0.135519	-0.171556	-0.163334	0
GATA1	0	0.0797472	0	0	0	0	0	0	0			0	0.107871	0.0688664	0	0	0	0	0	0			-0.152301	0.197768	0	0	-0.332031	0	-0.22358	0	-0.222416
GATA6	0	0	0	0	0	0	0	0	0			0	0	0	0	0	0	0	0	0			0	-0.0915464	0	-0.330652	0	0	0	0	0
GBP2	0	0.0507361	0	0	0	0	0	0	0			0	0	0	0	0	0	0	0	0			0	0.157415	0	0	0	0	0	0	0
GHR	0	0	0	0	0	0	0.193476	0	0.0572609			0	0.0583333	0	0	0	0	0.311146	0	0.063562			0	0.132598	0	-0.368242	0	0	0.337304	0	0
GIT2	0	0	0	0	0	0	0	0	0			0	0	0	0	0	0	0	0	0			0	0	0	0	0	0	0	0	0
GLI1	0	0	0	0	0	0	0	0	0			0	0	0	0	0	0	0	0	0			0	0	0	-0.225138	0	-0.152223	0	0	0
GLI3	0	0	0	0	0	0	0	0	0			0	0	0	0	0	0	0	0	0			0	-0.163479	0	-0.206266	0	0	-0.397231	0	0
GMPS	0	0	0	0	0	0	0	0	0			0	0	0	0	0	0	0	0	0			0	0.240687	0	0	0	-0.173551	0	0	0
GNA13	0	0	0	0	0	0	0	0	0			0	0	0	0	0	0	0	0	0			0	0	0	0	0	0	0.612963	0	0
GNAI1	0	0	0	0	0	0	0.0803465	0	0			0	0.0642856	0	0	0.0582902	0.0543072	0.144571	0	0			0	0.119679	0	0	0	0	0.265617	0	-0.359627
GNAQ	0	0	0	0	0	0	0	0	0			0	0	0	0	0	0	0	0	0			-0.223463	-0.144711	0	0	0	-0.247048	-0.262654	0	0
GNG4	0	0	0	0	0	0.0736	0	0	0.0854908			0	0	0.0573231	0.0511592	0.0522971	0.100639	0.0582096	0	0.123066			-0.209188	-0.237384	0	0	0	0.217582	0	0	0.220777
GOLGA5	0	0	0	0	0	0	0	0.0633838	0.0619953			0	0	0	0	0	0	0	0	0			0	-0.211908	0	0	0	0	0	0.267576	0.22645
GOPC	0	0	0	0	0.0685709	0	0	0	0			0.059585	0.0524577	0.0543394	0	0.122639	0	0	0	0.0630452			0	0	0	0	0.30373	0	0	0	0
GOSR1	0	0	0	0	0.058782	0	0.174411	0	0			0.0521073	0	0	0	0.0688576	0	0.333076	0	0			0	-0.416966	0	-0.269195	0	0	0.378462	0	-0.229536
GOT1	0.104338	0	0	0	0.0556532	0	0	0	0			0.153002	0.0602124	0	0	0.0710993	0	0	0	0.0625445			0.248838	0.0909592	0	-0.186085	0	-0.17337	-0.352777	0	0
GPC3	0.0571073	0	0.050004	0	0.0624528	0	0	0	0			0	0	0	0	0	0	0	0	0			0.181931	0	0	0	0	0	0	0	0
GPHN	0	0	0	0	0	0	0	0	0			0	0	0	0	0	0	0	0	0			0	-0.30351	-0.19932	-0.423842	0	-0.139835	-0.325238	0	0
GPR34	0.0545574	0	0	0	0	0.0749	0	0	0.120529			0	0	0	0	0	0	0	0	0			0.0976929	0	0	0	0	0.222732	-0.260798	0	0.394208
GRIN2A	0	0	0	0	0	0	0	0	0			0	0	0	0	0	0	0	0	0			0	-0.133159	0	0	0	0	-0.413839	0	-0.199515
GRIN2B	0	0	0	0	0	0	0	0	0			0	0	0	0	0	0	0	0	0			0	0	0	0	0	0	-0.185371	0	0
GRM1	0	0	0	0	0	0	0	0	0			0	0	0	0	0	0	0	0	0			0.166417	0	-0.277861	0	0	0	0	0	0
GRM3	0	0	0	0	0	0	0	0.0710137	0			0	0.0700336	0	0.0684192	0	0	0	0.1117	0			0	0.097325	-0.246406	0	0	0	-0.768047	0.233184	0
GSK3B	0	0	0	0	0	0	0	0	0			0	0	0	0	0	0	0	0	0			0	-0.221299	0	0	0	0	-0.418204	0	-0.202142
GSTT1	0	0	0	0	0	0	0	0	0			0	0	0	0	0	0	0	0	0			0	0	0	0	0	0	0	0	0
GTSE1	0	0	0	0	0	0	0	0	0			0	0	0	0	0	0	0	0	0			0	0	0	0	0	0	0	0	0
H3F3A	0	0	0	0	0.100525	0	0	0	0			0	0	0.0615173	0.0617797	0.230636	0	0	0.0534869	0			0	-0.190508	0	0	0.435268	-0.14922	-0.177697	0	0
HAS2	0	0	0	0	0	0	0	0	0			0	0	0	0	0	0	0	0	0			0	0	0	0	0	0	-0.317274	0	-0.248446
HDAC1	0	0	0	0	0	0	0	0	0			0	0	0	0	0	0	0	0	0			0.211377	0.1595	0	0	0	0	0	0	0.83872
HDAC2	0	0	0	0	0	0	0	0	0			0	0	0	0	0	0	0	0	0			0	0.0739032	0	0	0	0	-0.241627	0	0
HDAC3	0	0	0	0	0.0579642	0	0	0	0			0	0	0	0	0	0	0	0	0			0	0	0	0	0.386512	0	0	0	0
HDAC6	0	0	0	0	0	0	0	0	0			0	0	0	0	0	0	0	0	0			-0.120289	0	0	0	0	0	0	0	0
HEPH	0	0	0	0.0517091	0	0	0	0	0			0	0	0	0	0	0	0	0	0			0	-0.56907	0	0.173322	0	-0.118889	0	0	0
HERPUD1	0	0	0	0	0	0	0.0824778	0	0			0.0540742	0	0	0	0.0537412	0.0623931	0.150247	0.0649296	0.0519712			0	-0.211496	0	-0.218439	0	0	0.285176	0	0
HES1	0	0	0	0	0	0	0.0896604	0	0			0.0609434	0	0.0544862	0	0.0525599	0	0.205722	0.0548432	0			0	0	0	0	0	0	0.323712	0	-0.436458
HES5	0	0	0	0	0	0	0	0	0			0	0	0	0	0	0	0	0	0			0	0	0	0	0	-0.16614	-0.327139	-0.18792	0
HHEX	0	0	0	0	0	0	0	0	0			0.0730555	0.0596758	0.0581645	0	0	0	0	0	0			0.101008	0.122343	0	0	0	0	0	0	0
HIP1	0	0	0	0	0	0	0	0	0			0	0	0	0	0	0	0	0	0			0	-0.178424	0	0	0	0.128684	0	0	0.468824
HIPK1	0	0	0	0.0600304	0	0	0	0	0			0	0	0	0	0	0	0	0	0			0	-0.147796	0	0.215949	0	0	-0.43553	0	0
HIPK2	0	0	0	0	0	0	0.0513775	0	0			0	0	0	0	0	0	0	0	0			0	-0.0794372	0	0	0	0	0.205251	0	-0.162217
HIST1H1C	0	0	0	0	0	0	0	0	0			0	0	0	0	0	0	0	0	0			0	0	0	-0.167916	0	0	0	-0.228331	0
HIST1H1D	0	0	0	0	0	0	0	0	0			0	0	0	0	0	0	0	0	0			0.23113	0.149878	0	0	0	0	0	0	0
HIST1H1E	0	0	0	0	0	0	0	0	0			0	0	0	0	0	0	0	0	0			0	0	0	-0.234945	0	0	0	0	0
HIST1H2AC	0	0	0	0	0	0	0	0	0			0	0	0	0	0	0	0	0	0			0	-0.105561	0	0	0	0	-0.170719	0	0
HIST1H2AG	0	0	0	0	0	0	0	0	0			0	0	0	0	0	0	0	0	0			0.187403	0	0	0	0	0	0	-0.223296	0
HIST1H2AL	0	0	0	0	0	0	0	0	0			0	0	0	0	0	0	0	0	0			0	0	0	0	0	-0.132489	0	0	0
HIST1H2AM	0	0	0	0	0	0	0	0	0			0	0	0	0	0	0	0	0	0			0	0.113889	0	0	0	0	-0.326236	-0.182622	0
HIST1H2BC	0	0	0	0	0	0	0	0	0			0	0	0	0	0	0	0	0	0			0	0.121967	-0.212444	0	0	0	0	0	-0.48946
HIST1H2BJ	0	0	0	0	0	0.0609078	0	0	0			0	0	0	0	0	0	0	0	0			0	0	-0.223337	0	0	0.242626	0	0	0
HIST1H2BK	0	0	0	0	0	0	0	0	0			0	0	0	0	0	0	0	0	0			0	0	0	-0.288743	0	-0.205053	-0.241634	0	0
HIST1H2BO	0	0	0	0	0	0	0	0	0			0	0	0	0	0	0	0	0	0			0	0	0	0	0	-0.171294	0	0	0.210846
HIST1H3B	0	0	0	0	0	0	0	0	0			0	0	0	0	0	0	0	0	0			0	0	0	0	0	0	0	0	0
HIST1H4I	0	0	0	0	0	0	0	0	0			0	0	0	0	0	0	0	0	0			0	-0.108227	0	0	0	0	0	0	0
HLF	0	0	0	0	0	0	0	0	0.0743682			0	0	0	0	0	0	0	0	0			0	0.10088	0	-0.244759	0	0	-0.187515	0	0.247292
HMGA1	0	0	0	0	0	0	0	0	0			0	0	0	0	0	0	0	0	0			0	-0.105943	0	0	0	0	-0.218195	0	0
HMGB1	0	0	0	0	0	0	0	0	0			0	0	0	0	0	0	0	0	0			-0.191627	-0.217333	0	0	0	0	0	0	0
HNRNPA2B1	0	0	0	0.0828523	0	0	0	0	0			0	0	0.0508788	0.133669	0	0.0642325	0.0595044	0	0			0	-0.0887084	0	0.249075	0	0.132218	0	0	0
HOXA11	0	0	0	0	0	0	0.159777	0	0			0	0	0.0538995	0	0.0549758	0	0.363715	0	0			-0.136999	0	0	-0.210359	0	-0.137257	0.421798	0	0
HOXA13	0	0	0	0	0	0	0	0	0			0	0	0	0	0	0	0	0	0			-0.16537	-0.234147	0	0	0	0	-0.265287	-0.163372	0
HOXA3	0	0	0	0	0.0677452	0	0	0	0			0	0	0.0514696	0	0.10803	0	0.0661712	0	0			0	-0.18847	0	0	0.257687	0	0	0	-0.26683
HOXA9	0	0	0	0	0	0	0	0	0			0	0	0	0	0	0	0	0	0			0	-0.522941	0	0	0	0	0	0	0
HOXC13	0	0	0	0.0625315	0	0	0	0	0			0	0	0	0	0	0	0	0	0			0	0	0	0.230357	0	0	-0.241146	0	-0.194616
HOXD11	0	0	0	0	0	0	0	0	0			0	0	0	0	0	0	0	0	0			0	0	0	0	0	-0.138989	0	0	0
HOXD9	0	0	0	0	0	0	0	0	0			0	0	0	0	0	0	0	0	0			-0.178703	0	0	0	0	0	-0.168439	0	0
HRAS	0	0.063347	0	0.139747	0.0673729	0	0	0	0			0	0	0	0	0	0	0	0	0			0	0.446103	-0.197302	0.298071	0	0	-0.274884	0	0
HSPA1A	0	0	0	0	0	0	0.077748	0	0			0	0.0538652	0	0	0.0640764	0	0.128018	0	0.0548449			0	0	0	0	0	0	0.241724	0	0
HSPA2	0.0503046	0	0	0.0560613	0	0.0704116	0	0	0.0547805			0	0	0	0	0	0	0	0	0			0.130251	0	0	0	0	0.21121	0	-0.176752	0.188294
HSPA4	0	0	0	0	0	0	0.0504797	0	0			0	0	0	0	0	0	0	0	0			0	0	0	0	0	-0.312769	0.166549	0	0
HSPA5	0	0	0	0	0	0	0.0568595	0	0			0	0	0	0	0	0	0	0	0			0	-0.286493	-0.223205	0	0	0	0.170266	0	0
HTRA1	0.064835	0	0	0.0690091	0.0867357	0	0	0	0.0547099			0.0761182	0	0	0.080641	0.109161	0.059401	0	0	0.0663741			0.209216	-0.199694	0	0.20154	0.237999	0	-0.1943	0	0
IBSP	0	0	0	0	0	0	0	0	0			0	0	0	0	0	0	0	0	0			0	0	0	0	0	0	0	0	0
ICAM1	0	0	0	0	0	0	0	0	0			0	0	0	0	0	0	0	0	0			0	0	0	0	0	0	0	0	0
ICK	0	0	0	0	0	0	0	0	0			0	0	0	0	0	0	0	0	0			0	0	0	0	0	0.174237	0	0	-0.272385
ID1	0	0	0	0	0	0	0	0	0			0	0	0	0	0	0	0	0	0			-0.386204	-0.201316	0	-0.273682	0	0.137556	-0.206852	0	-0.245776
ID3	0	0	0	0	0	0	0	0	0			0	0	0	0	0	0	0	0	0			0	0.0868596	0	0	0	0	0	0	0
ID4	0	0	0	0.0534365	0	0	0	0	0			0	0	0	0	0	0	0	0	0			0	-0.071281	0	0.183432	0	0	-0.258976	0	-0.488108
IDH1	0	0	0	0	0	0	0	0	0			0	0	0	0	0	0	0	0	0			0	0	0	0	0	0.132966	0	0	-0.236784
IDH2	0	0	0	0	0.0610199	0	0.0533169	0.069659	0			0	0	0	0	0	0	0	0	0			-0.125407	-0.0544641	0	0	0	-0.128686	0	0.156814	0
IFNG	0	0	0	0.0593523	0	0.0698419	0	0	0			0	0	0.0600356	0.0831107	0	0.098933	0	0.054484	0			0	0	0	0.173682	-0.252138	0.211403	-0.326747	0	0
IFRD1	0.0503546	0.0575733	0	0.0518338	0.0623038	0.0938094	0.120488	0.0656584	0			0.0519174	0.0562888	0	0.0527647	0.0597608	0.104099	0.225471	0.0624281	0			0	0	0	0	0	0.224368	0.357654	0	0
IGF1	0.061467	0	0	0	0	0	0	0	0.051125			0	0	0	0	0	0	0	0	0			0.260074	-0.0776807	0	0.179362	-0.267929	-0.193765	-0.396566	0	0.185716
IGFBP2	0	0	0	0	0	0.0592049	0	0	0			0	0	0	0	0	0.0833551	0	0.0640218	0			0	0	0	0	0	0.142246	-0.168794	0	0
IGFBP3	0	0	0	0.0557388	0	0	0	0	0			0	0	0	0	0	0	0	0	0			0	-0.0737374	0	0.26368	0	0.188255	-0.291628	-0.243512	0
IKBKB	0	0	0	0	0	0	0.0522105	0	0			0	0	0	0	0	0	0	0	0			0	0.116379	0	0	0	0	0.155463	0	0
IKBKE	0	0	0	0	0	0	0	0	0			0	0	0	0	0	0	0	0	0			0	-0.256868	0	0	0	0	0	0	0
IKZF1	0	0	0	0.0652958	0	0	0	0	0			0	0	0	0.103756	0.0680412	0	0	0.0535007	0			0	0	0	0.214605	0	0	-0.215033	0	0
IKZF2	0	0.0958141	0	0	0	0	0	0	0			0	0.169933	0	0	0	0	0	0.0658505	0.0527454			0	0.326012	0	0	0	-0.2095	0	0	0
IKZF3	0	0	0	0	0.0688373	0	0.115218	0	0			0	0	0	0	0.0847541	0	0.217998	0.0650731	0			0	0	0	0	0	0	0.367084	0	0
IL12RB2	0	0	0	0	0	0	0	0	0			0	0	0	0	0	0	0	0	0			0	0	0	0	0	0	0	0	0
IL13RA2	0	0	0	0	0	0	0	0	0			0	0	0	0	0	0	0	0	0			0	0.143279	0	0	0	0	0	0	0
IL13	0	0	0	0.0720919	0	0	0	0	0			0	0	0	0.120672	0	0.0527538	0	0.0682621	0.0532315			0	0	0	0.279423	0	0	-0.281161	0	0
IL15	0	0	0	0.0881016	0	0	0	0	0.0809688			0	0	0	0	0	0	0	0	0			-0.209923	0	0	0.236392	0	-0.140678	-0.246489	0	0.246155
IL1B	0	0	0	0	0	0	0	0	0			0	0	0	0	0	0	0	0	0			-0.16621	0	0	0	0	0.141477	0.167235	0	0
IL1R1	0	0	0	0	0	0	0	0	0			0	0	0	0	0	0	0	0	0			0	0	0	-0.25283	0	0	0.164825	-0.176558	0
IL1RAP	0	0	0	0	0.0780888	0	0	0	0			0	0	0	0.0745666	0.127795	0	0	0	0			0	0	0	0	0.301629	0	-0.210688	0	-0.195996
IL21R	0	0	0	0	0	0	0	0	0			0	0	0	0	0	0	0	0	0			0	0.173573	0	0.216995	0	0	-0.150328	0	0
IL2RA	0	0	0	0.0847293	0	0	0	0	0			0	0	0.0513384	0.151047	0	0.0563866	0	0	0			-0.13677	0	0	0.306348	0	0	-0.188022	0	0
IL2	0	0	0	0	0	0	0	0	0			0	0	0	0	0	0	0	0	0			0	-0.0947456	0	0	0	0	0	0	0.249821
IL3	0	0	0	0	0	0	0	0	0			0	0	0	0	0	0	0	0	0			-0.266133	-0.163414	0	0	0	-0.20268	0	0	0
IL6	0	0	0	0	0	0	0	0	0			0	0	0	0	0	0	0	0	0			0	-0.0904309	0	0	0	0	0	0	0
IL7R	0	0	0	0	0	0	0	0	0			0	0	0	0	0	0	0	0	0			0	0	0	0.412279	0	0	0	0	0
CXCL8	0	0	0	0	0	0	0.0590798	0	0			0	0	0	0	0	0	0	0	0			0	-0.136959	0	0	0	0.146098	0.173221	0	0
INHBA	0	0	0	0	0.0536302	0	0	0	0			0	0	0	0	0	0	0	0	0			-0.204537	-0.0837505	0	0	0	0	0.222851	0	0
INPP4A	0	0	0	0	0	0.0505545	0	0	0			0	0	0	0	0	0	0	0	0			-0.154219	-0.160743	0	0	0	0.207518	-0.325504	0	0
INPP4B	0	0	0	0	0	0	0	0	0			0	0	0	0	0	0	0	0	0			0	-0.0645947	0	0	0	0	0	0	0
INPP5A	0	0	0	0	0	0	0	0	0			0	0	0	0	0	0	0	0	0			0	0	0	0	0	0	0	0	0
INPP5D	0	0	0	0	0	0	0.0876731	0	0			0.0683314	0.0548243	0.0614913	0	0.0599785	0	0.141147	0	0			0.150794	0	0	-0.167186	0	-0.149036	0.261547	-0.172317	0
IQCG	0	0	0	0	0	0	0	0	0			0	0	0	0	0	0	0	0	0			-0.111284	0	0	0	0	0	0	0	0
IRF1	0	0	0	0	0	0	0.148695	0	0			0	0	0	0	0	0	0	0	0			-0.269121	-0.174222	0	-0.197079	0	0	0.351024	0	0
IRF8	0	0	0	0	0	0	0	0	0			0	0	0	0	0	0	0	0	0			0	0	0	0.209167	0	0	0	0	0
IRS4	0.0905767	0	0	0	0	0	0.0590471	0	0			0.14683	0.0548608	0.0580714	0	0	0	0.0821857	0	0			0.293423	0	0	0	-0.339493	0	0.179706	0	0
ITGA5	0	0	0	0.0550336	0.0724702	0	0	0	0			0	0	0	0	0	0	0	0	0			0	0	0	0.166263	0.307278	0	-0.169871	-0.252975	0
ITGA7	0	0.0637187	0	0.0701211	0	0.0616419	0	0	0			0	0	0	0	0	0	0	0	0			0	0.162616	0	0.200625	-0.256563	0.171684	-0.273462	0	0
ITGA8	0	0	0	0	0	0	0	0	0			0	0	0	0	0	0	0	0	0			0	-0.114286	0	0	0	0	-0.205015	0	0
ITGB3	0.0751588	0	0	0.108509	0	0	0	0	0			0.0921898	0.0506102	0	0.172475	0	0.0633532	0	0.0573039	0.0520136			0.190723	0	0	0.272291	0	0.191522	0	0	0
ITK	0	0	0	0.0605585	0	0	0	0	0			0	0	0	0	0	0	0	0	0			0.151669	-0.139808	0	0.160736	0	0	0	0	0
ITPKA	0	0	0	0	0	0	0	0	0			0	0	0	0	0	0	0	0	0			0	0	0	0	0	0	0	0	0
JAG2	0	0	0	0	0	0	0	0	0			0	0	0	0	0	0	0	0	0			0	0	0	0	0	-0.163063	0	-0.16955	0
JAK1	0	0	0	0	0	0	0.0613117	0	0			0	0	0	0	0	0	0	0	0			0	-0.131379	0	0	0	0	0.201921	0	0
JAK2	0	0	0	0	0	0	0	0	0			0	0	0	0	0	0	0	0	0			0	0.137492	0	0	0	0	0	0	0
JAK3	0	0	0	0	0	0	0	0	0			0	0	0	0	0	0	0	0	0			0	-0.156376	0	0.1846	0	-0.654896	-0.247475	0	0
JARID2	0	0	0	0	0	0	0	0	0			0	0	0	0	0	0	0	0	0			0	0.170151	0	0	0	0	-0.345538	-0.175226	0
JAZF1	0	0	0	0	0	0	0	0	0			0	0	0	0	0	0	0	0	0			0	-0.111972	0	-0.305443	0	0	-0.214652	0	0
JUN	0	0	0	0	0	0	0	0	0			0	0	0	0	0	0	0	0	0			0	-0.079871	0	0	0	0	-0.281684	0	0
KAT2B	0	0	0	0	0.0569706	0	0.149816	0	0			0	0	0	0	0.0727465	0	0.34665	0	0			0	-0.0726072	0	-0.1937	0	0	0.410221	0	0
KCNB1	0	0	0	0	0	0	0	0	0			0	0	0	0	0	0	0	0	0			0	0	0	0	0	-0.170947	0	0.277483	0
KDM2B	0.0580029	0	0	0	0	0.0555629	0	0	0			0	0	0	0	0	0	0	0	0			0.224207	0	0	0	-1.10376	0.201018	-0.222096	0	-0.455449
KDM4C	0	0.0510865	0	0.133081	0.100932	0	0	0	0			0	0.0597985	0	0.220241	0.133859	0.0547566	0	0	0.0519726			0	0.0957477	0	0.312352	0.275172	0	0	0	0
KDM5A	0	0	0	0	0	0	0	0	0			0	0	0	0	0	0	0	0	0			0	-0.143632	0	0	0	0	0	0	0
KDM5C	0	0	0	0	0.0591238	0	0	0	0.0512361			0	0	0	0	0	0	0	0	0			0	0.173535	0	0	0	-0.165536	0	0	0.150677
KDM6A	0	0	0	0	0	0	0	0	0			0	0	0	0	0	0	0	0	0			0	0.288569	0	0	0	0	-0.34748	0	0
KDR	0	0	0	0	0	0	0	0	0			0	0	0	0	0	0	0	0	0			-0.186513	0.0681656	0	0	0	-0.140016	-0.270431	0	0
KDSR	0.0573566	0.070244	0	0.0990337	0.153251	0	0	0	0.0609505			0.0575848	0.0666163	0	0.106265	0.36079	0	0	0	0.0599235			0	0.13969	0	0.25109	0.486349	0	0	0	0
KEAP1	0	0	0	0.0768644	0.0778388	0.0615308	0.146541	0	0.0506024			0	0.0503481	0	0.0753886	0.0766462	0.0614096	0.211708	0	0.0544527			-0.134396	0	0	0	0	0	0.246175	0	0
KIAA0232	0	0	0	0	0	0.101025	0	0	0			0.0530527	0.0635739	0	0	0	0.186109	0	0	0			0	0.114268	0	0	0	0.305102	-0.244901	-0.15794	0
ATG13	0	0	0	0	0	0	0	0	0			0	0	0	0	0	0	0	0	0			-0.156867	-0.591589	0	0	0	0	0	0	0
KIAA1524	0	0	0	0	0	0	0	0	0			0	0	0	0	0	0	0	0	0			-0.222428	-0.0644262	0	-0.301068	0	-0.10103	0.149822	0	0
CCAR2	0	0	0	0	0	0	0	0	0			0	0	0	0	0	0	0	0	0			-0.120861	0	0	-0.282951	-0.297006	-0.239207	-0.231101	0	0
KIT	0	0	0	0.132029	0	0	0	0	0			0.0519739	0	0	0.214816	0	0	0	0	0			0	0	0	0.285465	0	0	0	0	-0.239964
KLF4	0	0	0	0	0	0	0	0	0			0	0	0	0	0	0	0	0	0			0	0	0	0	0	0	-0.235131	0	0
KLHL6	0	0	0	0	0	0	0	0	0			0	0	0	0	0	0	0	0	0			-0.122262	-0.144909	0	-0.226325	0	-0.350535	0	0	0
KPNB1	0	0	0	0	0.0609879	0	0	0	0			0.0635472	0	0.0590076	0	0.105114	0.0524277	0	0	0.0566208			0.214149	0	0	0	0.229136	0	0	-0.274232	0
KSR1	0	0	0	0	0	0	0	0	0			0	0	0	0	0	0	0	0	0			-0.263069	0	0	0	-0.528056	0	0	-0.215952	0
LAMA1	0	0	0	0.0548017	0	0	0.0650628	0	0			0	0	0	0	0	0	0	0	0			-0.364723	-0.210721	0	0.170049	-0.31617	-0.119871	0.185268	-0.1701	-0.191946
LAMA5	0	0	0	0.0593618	0	0	0	0	0			0	0	0	0	0	0	0	0	0			0.11377	-0.254658	0	0.207688	0	0	-0.168913	0	0
LAMP2	0.0829031	0	0	0	0	0	0	0	0.0572277			0.11259	0	0.0573547	0	0.0520935	0	0	0.0671748	0.0777609			0.194175	0	0	0	0	0	-0.142073	0	0.182797
LASP1	0	0	0	0	0	0	0.15631	0	0			0	0	0	0	0	0.0581875	0.292894	0	0			0	-0.159213	0	-0.165606	0	0	0.355202	-0.156019	-0.21603
LCK	0	0	0	0	0	0	0	0	0			0	0	0	0	0	0	0	0	0			0	0	0	0	0	0	0	0	0
LEF1	0	0	0	0	0	0	0.0549575	0	0			0	0	0	0	0	0	0	0	0			0	0	0	0	0	0	0.197234	0	0
LEFTY2	0	0	0	0.0991792	0.0553042	0	0	0	0.0561981			0	0	0	0.13459	0.0713649	0	0	0	0.0747631			0	-0.0989717	0	0.228599	0	0	0	0	0.23135
LGALS3	0	0	0	0	0.0916214	0	0	0	0			0	0.0543305	0	0.0559577	0.168842	0	0	0	0.0668511			-0.13498	0	0	0	0.326887	-0.204954	0	-0.184979	0
LGR5	0	0	0	0	0	0	0	0	0			0	0	0	0	0	0	0	0	0			0	0	0	0	0	0	0	0	0
LHFP	0	0	0	0	0	0	0	0	0.0693068			0	0	0	0	0	0	0	0	0			0	0	0	-0.267344	0	0	-0.273907	-0.156089	0.238284
LHX2	0	0	0	0	0	0	0	0	0			0	0	0	0	0	0	0	0	0			0	-0.0817382	0	-0.391247	0	0.139994	0	0	0
LHX4	0	0	0	0	0	0	0	0	0			0	0	0	0	0	0	0	0	0			0	0.154959	0	0	0	0	-0.357389	0	0
LINGO2	0	0	0	0	0	0	0.0688045	0	0			0	0	0	0.057582	0	0	0.0966986	0	0.070765			-0.220151	0	0	0	0	0	0.169973	0	0
LMO1	0	0	0	0	0	0	0	0	0			0	0	0	0	0	0	0	0	0			0	-0.0613996	0	0	0	0	0	0	0
LMO2	0.0510979	0	0	0	0	0.0575064	0	0.0634894	0			0	0	0	0	0	0	0	0	0			0.132744	-0.135232	0	0	0	0.186184	0	0.185925	-0.368184
LMO7	0	0	0	0	0	0	0	0	0			0	0	0	0	0	0	0	0	0			0	0	0	-0.273971	0	0	-0.313261	0	0
LNP1	0	0	0	0	0	0	0	0	0			0	0	0	0	0	0	0	0	0			-0.143548	-0.0454895	0	0	0	0	-0.285359	0	0
LINC00598	0	0	0	0	0	0	0	0	0			0	0	0	0	0	0	0	0	0			0	0.0774065	0	0	0	0	-0.160611	-0.24858	0
LOX	0	0	0	0	0	0	0	0	0			0	0	0	0	0	0	0	0	0			0	0	0	0	0	0	-0.143141	0	0
LPAR1	0	0	0	0	0	0	0	0	0			0	0	0	0	0	0	0	0	0			0	-0.12528	0	0	0	0	-0.277935	0	0
LPP	0	0	0	0	0	0	0	0	0			0	0	0	0	0	0	0	0	0			0	0	0	0	0	-0.251576	0	0	0
LPXN	0	0	0	0	0	0	0	0	0			0	0	0	0	0	0	0	0	0			0	-0.148384	0	0	0	0	0	0	0
LRIG3	0	0	0	0	0	0	0	0	0			0	0	0	0	0	0	0	0	0			0	0.122724	0	0.179445	0	0	-0.223975	-0.26983	0
LRMP	0	0	0	0	0	0	0	0	0			0	0	0	0	0	0	0	0	0			0	-0.626322	0	0	0	0	-0.163763	0	0
LRPPRC	0	0	0	0	0	0	0.0790477	0	0			0.0605567	0.0572107	0.0504255	0	0.0722585	0	0.147646	0	0			0	0	0	0	0	-0.142336	0.288027	0	-0.356068
LRRC37B	0	0	0	0	0.107149	0	0	0	0			0	0	0.0607105	0	0.193954	0	0	0	0			0	-0.163264	0	0	0.360443	0	-0.21489	0	0
LRRC59	0	0	0	0	0	0	0	0	0			0	0	0	0	0	0	0	0	0			0	0	0	0	0	-0.115594	0	0.122005	0
LRRC7	0	0	0	0	0	0	0	0.0777256	0			0.0507752	0	0	0	0	0	0	0.111189	0.0536537			0	-0.160361	0	-0.266235	0	0	0	0.190616	0
LTBP1	0	0	0	0	0	0	0	0	0			0	0	0	0	0	0	0	0	0			0	0.143865	0	0	0	-0.149216	0	0	0
LYL1	0.0629053	0	0	0	0	0	0	0	0			0.0939837	0	0.0733842	0.0511975	0	0	0	0	0			0.192362	0	0	0	0	0	-0.315525	0	-0.233521
LYN	0	0	0	0	0	0	0	0	0			0	0	0	0	0	0	0	0	0			0	-0.0735239	0	0	0	0	0.448845	0	0
MACROD1	0	0	0	0	0	0	0	0	0			0	0	0	0	0	0	0	0	0			-0.185611	0	0	-0.208582	0	0	0	0	0
MAD2L1	0.0767806	0	0	0.0832866	0	0.066402	0	0	0			0.0967625	0	0	0.103117	0	0.0816108	0	0	0			0.270675	0	0	0.204448	0	0.193912	-0.29306	0	0
MADD	0	0	0	0	0	0	0	0	0			0	0	0	0	0	0	0	0	0			-0.173957	-0.174797	0	0	0	0	0	0	0
MAF	0	0	0	0	0	0	0	0	0			0	0	0	0	0	0	0	0	0			0	0	0	0	0	0	-0.221443	-0.246656	0
MAGED1	0	0	0	0	0	0	0	0	0			0	0	0	0	0	0	0	0	0			-0.226982	-0.071171	0	0	-0.408899	0	-0.239175	0	0
MAGEE1	0	0	0	0	0	0	0	0	0			0	0	0	0	0	0	0	0	0			0	-0.28124	0	-0.297216	0	0.130007	0	-0.169734	0
MALT1	0	0	0	0	0.0647555	0	0	0	0			0.07232	0	0	0.0506145	0.104701	0.051069	0	0	0.0588909			0.139788	0	0	0	0.224033	0	0	-0.172599	0
MAML1	0.0656777	0.0527257	0.06395	0	0.0882158	0	0	0	0			0.0792057	0.066815	0.0787818	0	0.120125	0	0	0	0.0520168			0.177242	0.148382	0.253624	-0.408757	0.267896	0	0	0	0
MAML2	0	0.106992	0	0	0	0.0533009	0	0	0			0	0.176177	0.0583161	0.0590827	0	0.0677763	0	0.0617363	0			0	0.297714	0	0	0	0.129954	-0.159037	0	0
MAP2K1	0	0	0	0	0	0	0	0	0			0	0	0	0	0	0	0	0	0			0	0.170361	0	0	0	0	-0.254656	0	0
MAP2K4	0	0	0	0	0	0	0	0	0			0	0	0	0	0	0	0	0	0			-0.265895	-0.0774084	-0.289511	-0.281745	0	-0.293241	0	0	-0.236957
MAP2K5	0	0	0	0	0	0	0	0	0			0	0	0	0	0	0	0	0	0			0	-0.210835	0	0	0	0	0	0	0
MAP2K6	0	0	0	0	0	0	0	0	0			0	0	0	0	0	0	0	0	0			0.119507	0	-0.193686	0	0	0	0	-0.509284	0
MAP2	0	0	0	0.0572764	0	0	0	0	0.0541598			0	0	0	0	0	0	0	0	0			0	0	0	0.251446	0	0	-0.239689	0	0.109115
MAP3K14	0	0	0	0	0	0	0	0	0			0	0	0	0	0	0	0	0	0			0	-0.152211	0	0	0	0	0	0	0
MAP3K1	0	0	0	0.102385	0	0	0	0	0			0.0551145	0.056017	0.0548903	0.158186	0.0515053	0	0	0	0.0640244			0	0	0	0.226601	0	0	-0.173181	0	0
MAP3K6	0.0703713	0	0	0	0	0	0	0	0			0.0942048	0.0615287	0.0606497	0.0536645	0	0	0	0	0.0713223			0.155122	0.0998655	0	0	0	0	-0.420628	0	0
MAP3K7	0	0	0	0	0	0	0	0	0			0	0	0	0	0	0	0	0	0			0	0	0	-0.341005	0	-0.127515	0	0	-0.337554
MAPK1	0.0805582	0.0626889	0.0664571	0.0580527	0.0827171	0.0665372	0.129975	0.0659191	0			0.0699247	0.0542272	0.0577719	0.0525457	0.0731228	0.0579422	0.2235	0.0569711	0			0.166102	0	0	0	0	0	0.330988	0	0
MAPK3	0	0	0	0	0	0	0	0	0			0	0	0	0	0	0	0	0	0			0	0.169571	0	0.226478	0	-0.195438	0	0	0
MAPK8	0	0	0	0.0982064	0.0514274	0	0	0.0774634	0			0	0	0	0	0	0	0	0	0			0	0	0	0.25344	0	0	-0.392305	0.191664	0
MAPRE1	0	0	0	0	0	0	0	0	0			0	0	0	0	0	0	0	0	0			0	0.191323	0	0	0	0	0	0	0
MATK	0	0	0	0	0	0	0	0	0			0	0	0	0	0	0	0	0	0			0	-0.112524	-0.236992	-0.328819	0	0	-0.358081	0	0
MAX	0	0	0	0	0	0	0	0	0			0	0	0	0	0	0	0	0	0			0	0	0	0	0	0	0	0	-0.210332
MBNL1	0	0	0	0	0	0	0.051297	0	0			0	0	0	0	0	0	0	0	0			-0.173494	-0.0785565	0	0	0	0	0.178735	0	0
MBTD1	0	0.0634557	0	0	0.0623716	0	0	0	0			0	0	0	0	0	0	0	0	0			0	0.182676	0	0	0	0	0	-0.167999	0
MCL1	0	0	0	0	0	0	0	0	0			0	0	0	0	0	0	0	0	0			0.348381	0	0	0	0	0	0	0	0
MDC1	0	0	0	0	0	0	0	0	0			0	0	0	0	0	0	0	0	0			0	-0.143815	0	0.170548	0	0	-0.150558	0	0
MDH1	0	0	0	0.0575865	0	0	0	0	0			0	0	0	0	0	0	0	0	0			0	0	0	0.178998	0	0	-0.289433	0	0
MDM4	0	0	0	0	0	0	0	0	0			0	0	0	0	0	0	0	0	0			0	0	0	0	0	0	0	0	0
MDS2	0.120439	0.114527	0.110067	0.133449	0.14941	0.1077	0	0.109928	0.112829			0	0	0	0	0	0	0	0	0			0.167866	0.214232	0	0.213731	0.351195	0	-0.227847	0	0
MEAF6	0	0	0	0	0	0	0	0	0			0	0	0	0	0	0	0	0	0			0	-0.164106	0	0	0	0.140091	0	0	0
MEF2B	0.0580556	0	0	0	0	0	0	0	0			0.0879766	0	0.0524149	0.0666669	0.060506	0.0599462	0	0	0.055502			0.163174	0	0	0	0	0	-0.312314	0	0
MEF2C	0.056981	0	0	0	0	0	0	0.0906972	0			0.0801187	0	0	0	0	0.0602713	0	0.104273	0			0.192409	0	0	0	0	0	-0.146852	0.122367	0
MEF2D	0	0.053075	0	0	0	0	0	0	0			0	0	0	0	0	0	0	0	0			0	0.103352	-0.193175	0	0	0	-0.30447	0	0
MELK	0	0	0	0	0	0	0	0.0830658	0			0	0	0.0565598	0	0	0	0.0534456	0.118669	0			0	-0.101594	0	0	0	0	0	0.170278	0
METTL7B	0	0	0	0	0	0	0	0	0			0	0	0	0	0	0	0	0	0			0	0.0768507	0	0	0	0	-0.183164	0	0
MET	0	0	0	0	0	0	0.0689151	0	0			0	0	0	0	0	0	0.116013	0.0577717	0			-0.198127	0	0	0	0	0	0.252715	0	0
MFNG	0	0	0	0	0	0	0	0	0			0	0	0	0	0	0	0	0	0			0	-0.0897899	0	0	0	0	0	0	0
MGMT	0	0.0576139	0	0	0	0	0.105272	0.0872402	0			0	0.0656213	0	0	0	0.0602128	0.16736	0.105754	0.0520588			0	0.0868251	0	0	0	0	0.294198	0.185784	0
MIB1	0	0	0	0	0	0	0	0	0			0	0	0	0	0	0	0	0	0			0	-0.14957	0	0	0	0.120588	0	0	0
MKI67	0	0	0	0	0	0	0	0	0			0	0	0	0	0	0	0	0	0			0.203127	-0.392686	0	0	-0.280862	0	-0.246866	0	0
MKL1	0	0	0	0	0	0	0	0	0			0	0	0	0	0	0	0	0	0			0	0	0	0	0	-0.315103	0	0	0
CENPU	0	0	0	0	0	0	0.0789491	0.0603027	0			0	0.0506112	0.0567709	0	0.0688829	0	0.104408	0.0801108	0			0	-0.273007	0	0	0	0	0.189098	0.192222	-0.251343
MLF1	0	0	0	0	0	0	0.062114	0	0			0	0	0	0	0	0	0	0	0			-0.154376	-0.220793	0	0	0	-0.224906	0.147762	0	0
MLH1	0	0	0	0.0809634	0	0	0.0651173	0	0			0	0	0	0.123679	0	0.0517239	0.0897528	0.0564617	0.0586768			0	-0.0972631	0	0.274114	0	0	0.192575	0	0
KMT2B	0	0	0	0	0	0	0	0	0			0	0	0	0	0	0	0	0	0			0	-0.35882	0	0	0	-0.51737	0	0	0
MLLT10	0	0	0	0	0	0	0	0	0			0	0	0	0	0	0	0	0	0			0	0	0	-0.284914	0	0	-0.270317	0	0
MLLT1	0	0	0	0	0	0	0	0	0			0	0	0	0	0	0	0	0	0			0	0	0	-0.226694	0	0	0	0	0
MLLT3	0	0	0	0	0	0	0	0.050966	0			0	0	0	0	0	0	0	0	0			0.153105	0	0	0	-0.248385	0	0	0.17028	0
MLLT6	0	0	0	0	0.0722674	0	0	0	0			0	0	0	0	0	0	0	0	0			0	0	0	-0.392183	0.264614	0	0.209812	0	0
MMP7	0	0	0	0	0	0	0	0	0			0	0	0	0	0	0	0	0	0			0.157854	0.146469	0	0	0	0	-0.177411	0	0
MMP9	0	0	0	0	0	0	0	0	0			0	0	0	0	0	0	0	0	0			0	-0.257029	0	0	0	0	0	0	0
MNAT1	0	0	0	0	0	0	0	0	0			0	0	0	0	0	0	0	0	0			0	0	0	0	0	0	0	0	0
MPL	0	0	0	0	0	0	0	0	0			0	0	0	0	0	0	0	0	0			-0.160663	0	0	-0.328579	0	-0.118855	0	0	0
MRE11A	0	0	0	0	0	0	0.091977	0	0.058196			0	0	0	0.0671129	0	0	0.136847	0.0534604	0.0789146			-0.155477	-0.250126	0	0	0	0	0.247446	0	0.221488
MSH2	0	0	0	0	0	0	0.107993	0	0			0	0	0	0	0	0	0.190681	0	0			0	0	0	0	0	0	0.337328	0	0
MSH6	0	0	0	0	0	0	0	0	0			0	0	0	0	0	0	0	0	0			0	-0.193265	0	0	0	0	-0.173364	0	-0.256523
MSI2	0	0	0	0	0	0	0	0	0			0	0	0	0	0	0	0	0	0			0	-0.0827015	0	0	0	-0.192128	-0.258878	0	0
MSN	0	0	0	0.0596513	0	0	0	0	0			0	0.061784	0	0.096489	0	0	0	0	0.0579544			0	0.101632	0	0.193725	0	0	0	0	0
MTUS2	0	0	0	0	0	0	0	0	0			0	0	0	0	0	0	0	0	0			0	0	0	0	0	-0.306939	-0.141218	0	0
MUTYH	0.0507472	0	0	0.0559448	0	0	0	0	0			0	0	0	0	0	0	0	0	0			0.14699	0	0	0.121005	0	0	-0.304531	0	0
MYB	0	0	0	0.0539467	0.0670365	0	0.0883737	0	0			0	0.050534	0.0621462	0.0727831	0.0863531	0	0.101528	0	0			-0.218561	0	0	0.363537	0	-0.177962	0.114991	0	0
MYCL	0	0	0	0	0	0	0	0	0			0	0	0	0	0	0	0	0	0			0	-0.177512	0	0	0	0	0	0	0.4279
MYCN	0	0	0	0	0	0	0	0	0			0	0	0	0	0	0	0	0	0			0	0	0	0	0	0.150849	0	0	1.72808
MYC	0	0	0	0	0	0	0.160199	0	0			0	0	0	0	0	0	0.210316	0	0			0	0	0	0	0	0	0.234511	-0.167665	0
MYD88	0	0	0	0	0	0.055669	0	0	0			0.0543741	0	0	0.0673679	0.0502628	0.0951255	0	0.0523341	0.0572795			0	-0.107342	0	0	0	0.197534	-0.188366	0	0
MYO1F	0	0	0	0	0	0	0	0	0			0	0	0	0	0	0	0	0	0			0	0	0	0	0	-0.122747	0	0	0
KAT6A	0	0	0	0	0	0	0	0	0			0	0	0	0	0	0	0	0	0			0	0	0	0	0	0	0	0	0
KAT6B	0	0	0	0	0	0	0	0	0			0	0	0	0	0	0	0	0	0			0	0	0	0	0	0	-0.169952	0	0
NAB2	0	0	0	0	0	0	0	0	0			0	0	0	0	0	0	0	0	0			-0.119157	0.106528	-0.201176	0	0	0	-0.360211	0	0
NAPA	0	0	0	0	0	0	0.106586	0	0			0	0	0	0	0	0	0.186655	0	0			-0.187659	-0.110418	0	-0.288233	0	-0.162257	0.329847	-0.254109	-0.17367
NBN	0	0	0	0	0	0	0	0	0			0	0	0	0	0	0	0	0	0			0	0	0	0	0	-0.174155	0	0	0
NBR1	0	0	0	0	0	0	0	0	0			0	0	0	0	0	0	0	0	0			0.150738	0	0	0.173076	0	-0.221407	0	0	0
NCAM1	0	0	0	0	0	0	0	0	0			0	0	0	0	0	0	0	0	0			-0.164014	0	0	0	-0.334017	0	0	0	0
NCKIPSD	0	0	0	0	0	0	0	0	0			0	0	0	0	0	0	0	0	0			-0.230915	0.0775648	0	-0.341907	0	0	0	0	0
NCOA1	0	0	0	0	0	0	0	0	0			0	0	0	0	0	0	0	0	0			0	0	0	0	0	0	-0.210055	0	0
NCOA2	0	0	0	0	0	0	0	0.0770617	0			0	0	0	0	0	0	0	0	0			-0.141074	-0.217568	0	-0.201954	0	0.15465	0	0.183651	0
NCOA3	0	0	0	0	0	0	0.0595619	0	0			0	0	0	0	0	0	0	0	0			0	-0.0988525	-0.228615	-0.29322	0	-0.133356	0.217931	0	0
NCOA4	0	0	0	0	0	0	0.0910101	0	0			0	0	0	0	0	0	0	0	0			-0.264592	-0.156238	0	-0.176742	0	0	0.273573	0	0
NCOR2	0	0	0	0	0.0871575	0.117716	0	0	0			0	0.0564554	0	0	0.109356	0.170121	0	0	0			0	0	-0.207104	0	0.247276	0.255005	0	0	0
NCSTN	0	0	0	0	0	0	0	0	0			0	0	0	0	0	0	0	0	0			0	-0.351049	0	0	0	-0.190082	0	0	0
NDC80	0	0	0	0	0	0	0	0	0			0	0	0	0	0	0	0	0	0			-0.336404	-0.135618	0	-0.183043	0	0	0	0	0
NDUFAF1	0	0	0	0	0	0	0	0	0			0	0	0	0	0	0	0	0	0			-0.183775	0	0	0	0	0	0	0	-0.239244
NEDD4	0	0	0	0	0	0	0.0824538	0	0			0	0	0.0518559	0	0.0563428	0	0.1592	0	0.0501411			0	-0.193341	0	0	0	0	0.277118	0	0
NEURL1	0	0	0	0	0	0	0	0	0			0	0	0	0	0	0	0	0	0			-0.166769	0.141083	0	0	0	0	-0.412944	0	0
NF1	0	0	0	0	0.0705403	0.0840506	0	0	0			0	0.0557965	0	0	0.0954206	0.124514	0.0600228	0	0			0	0	-0.289941	0	0	0.275177	0	0	0
NFATC1	0	0	0	0	0	0	0	0	0			0	0	0	0	0	0	0	0	0			0	0	0	0	0	0	-0.233659	0	0
NFATC2	0	0	0	0	0	0	0	0	0			0	0	0	0	0	0	0	0	0			0	-0.0861706	0	0	0	0	-0.263606	-0.177392	0
NFE2L2	0	0	0	0	0	0	0	0	0			0	0	0	0	0	0	0	0	0			0	0	0	0	0	0	-0.190362	0	0
NFIB	0	0	0	0	0	0	0	0	0			0	0	0	0	0	0	0	0	0			-0.2096	-0.137133	0	0	0	-0.506654	0	-0.222535	0
NFKB1	0	0	0	0	0	0	0	0	0			0	0	0	0	0	0	0	0	0			0	-0.137195	0	0	0	0	-0.313543	0	0
NFKB2	0	0	0	0	0	0.10363	0	0	0			0.0601219	0	0.0561632	0.0537201	0	0.18167	0	0	0			0	0	0	0	0	0.28573	-0.172001	0	0
NFKBIA	0	0	0	0.0781636	0	0	0	0	0			0	0	0.0581043	0.119103	0.0584158	0	0	0.0584747	0.0630206			-0.204549	-0.609662	0	0.247406	0	0	-0.18058	0	0
NGFR	0	0	0	0	0	0	0	0	0			0	0	0	0	0	0	0	0	0			0	-0.0946091	0	0	0	0	-0.223822	0	0
NGF	0	0	0	0	0	0	0	0	0			0	0	0	0	0	0	0	0	0			0	0	0	0.423147	0	0	0	0	0.869453
NIN	0.0508633	0	0	0	0	0	0	0	0			0.0794249	0	0	0	0	0.061759	0	0	0			0.132705	-0.119231	0	0	0	0	-0.383364	0	0
NIPBL	0	0	0	0	0	0	0	0	0			0	0	0	0	0	0	0	0	0			0	-0.141925	0	0	0	-0.167704	-0.37074	0	0
NKX2-5	0	0	0	0.0654399	0	0	0	0	0			0	0	0	0	0	0	0	0	0			0	-0.175704	0	0.253029	0	0.151643	0	0	0
NOD1	0	0	0	0	0.0612328	0	0	0	0			0	0	0	0	0	0	0	0	0			-0.135262	-0.125832	0	0	0	0	0	0.151318	-0.176484
NODAL	0	0	0	0	0	0	0	0	0			0	0	0	0	0	0	0	0	0			0	0.0729191	0	-0.24372	0	0	0	0	0
NOTCH2	0	0	0	0	0	0	0	0	0			0	0	0	0	0	0	0	0	0			0	0	0	0	0	0	-0.282046	0.161529	0
NOTCH4	0	0	0	0	0	0	0	0	0			0	0	0	0	0	0	0	0	0			-0.190437	0	0	0	0	0	0.188471	0	0
NPM1	0	0	0	0	0.0613795	0	0.12044	0	0			0	0.050146	0	0	0.0754215	0.0628881	0.262893	0.056317	0			0	0	0	-0.392105	0	0	0.373738	0	-0.346789
NR3C1	0	0	0	0	0	0	0	0	0			0	0	0	0	0	0	0	0	0			0	0	-0.287607	0	0	-0.136483	-0.294423	0	-0.189048
NR4A3	0.0785384	0	0	0	0	0	0	0	0			0.136727	0	0	0.0546957	0	0	0	0.0661913	0.0508356			0.245683	-0.208791	0	0	0	0	-0.286245	0	0
NR6A1	0	0	0	0.0503267	0	0	0	0	0			0	0	0	0	0	0	0	0	0			0	0.230996	0	0.219277	0	0	0	0	0
NRAS	0	0	0	0.0509436	0	0	0	0	0			0	0	0	0	0	0	0	0	0			0	-0.19697	0	0.1814	0	0	-0.353558	0	0
NT5C2	0	0	0	0	0	0	0	0	0			0	0	0	0	0	0	0	0	0			0	-0.0763334	0	-0.211372	0	-0.174134	-0.237832	0	0
NTF3	0	0	0	0	0	0	0	0	0			0	0	0	0	0	0	0	0	0			0	0.0377338	0	0	0	0.11389	0	0	0
NTF4	0	0	0	0	0	0	0	0	0			0	0	0	0	0	0	0	0	0			0	0	0	0	0	0	0	0	0
NTRK2	0	0	0	0	0	0	0	0	0			0	0	0	0	0	0	0	0	0			0	0	0	-0.174077	0	0	0	0	0
NTRK3	0	0	0	0	0	0	0	0	0			0	0	0	0	0	0	0	0	0			0	0	0	0	0	0	0.167186	0	0
NUMA1	0	0	0	0.110419	0	0	0.14627	0	0			0	0	0	0.16599	0	0	0.250825	0	0			0	-0.121912	0	0.344778	-0.358638	0	0.318862	0	0
NUP107	0	0	0	0.0546052	0	0.0591772	0	0.0849274	0			0	0	0	0	0	0	0	0	0			-0.265592	-0.148071	0	0	0	0.150348	-0.170733	0.247245	0
NUP214	0	0	0	0	0	0	0	0	0			0	0	0	0	0	0	0	0	0			0	0.108504	0	0	0	0.161843	0	0	0
NUP93	0	0	0	0	0	0	0.188512	0	0			0	0.0550271	0	0	0.0508402	0	0.36638	0.0503454	0			-0.178161	0	0	0	0	0	0.391069	0	-0.16868
NUP98	0	0	0	0	0	0	0	0	0			0	0	0	0	0	0	0	0	0			0	-0.117458	0	0	0	0	0	0.149038	0
TENM1	0	0	0	0	0.0846453	0	0.0888127	0	0			0	0	0	0	0.113463	0.0638995	0.140825	0	0			0	-0.238696	0	0	0.266908	0.157051	0.43982	0	-0.435359
OLIG1	0	0	0	0.0698452	0.0615164	0	0	0	0			0	0	0	0	0	0	0	0	0			0	0	0	0.259734	0	0	0	-0.206236	0
OLIG2	0	0	0	0	0	0.0720066	0	0	0			0	0	0.0514558	0.0602525	0.0735373	0.123916	0	0.0533676	0.0514423			0	-0.0922514	0	0	0	0.258677	-0.263044	0	0
OLR1	0	0	0	0	0	0	0	0	0			0	0	0	0	0	0	0	0	0			0	-0.253346	0	0	0	0	-0.301999	0	0
OMD	0	0	0	0	0	0	0	0	0			0	0	0	0	0	0	0	0	0			0	0.14843	0	-0.271754	0	0	0	0	-0.278097
P2RY8	0.0562871	0	0	0	0	0	0	0	0			0	0	0	0	0	0	0	0	0			0.206976	-0.0881035	0	0	0	0	-0.378178	0	0
PAFAH1B2	0	0	0	0	0.0790683	0	0	0	0			0	0	0	0	0	0	0	0	0			0	0	0	-0.175853	0.265016	0	-0.214832	-0.216822	0
PAK1	0	0	0	0	0	0	0	0	0			0	0	0	0	0	0	0	0	0			0	0	0	0	0	-0.184649	0	0	0
PAK6	0	0	0	0.0719034	0.0809791	0	0	0	0			0	0.0591727	0.0597835	0.0889062	0.11017	0	0	0	0.0628332			0	0.124765	0	0.162828	0.25979	0	0	0	0
PAK7	0	0	0	0	0	0	0	0	0			0	0	0	0	0	0	0	0	0			0	-0.111071	-0.185156	0	0	0	0	0	0
PAPPA	0	0	0	0	0	0	0	0	0			0	0	0	0	0	0	0	0	0			-0.251424	-0.104823	0	0	0	-0.163917	-0.242608	0	0
PASK	0	0	0	0	0	0	0	0	0			0	0	0	0	0	0	0	0	0			0	0	0	-0.242951	0	0	0	0	0
PATZ1	0	0	0	0	0	0	0	0	0			0	0	0	0	0	0	0	0	0			0	0	0	0	0	0	-0.304807	0	0
PAX3	0	0	0	0.0786683	0	0	0.137179	0	0			0	0	0.0568008	0.0899964	0.053941	0	0.255978	0.0570998	0			0	-0.159172	0	0.230882	0	0	0.326688	0	0
PAX5	0	0	0	0	0	0	0	0	0.0859436			0	0	0	0	0	0	0	0	0			0	-0.134602	0	0	0	0	-0.402708	0	0.438386
PAX7	0	0	0	0	0	0	0	0.0507571	0			0	0	0	0	0	0	0	0	0			0	0	-0.243768	0	0	-0.374141	0	0.204633	0
PAX8	0	0	0	0	0	0	0	0	0			0	0	0	0	0	0	0	0	0			0.150837	0	0	0	0	-0.297564	-0.480582	-0.199133	0
PCBP1	0	0	0	0.0547216	0	0	0	0	0			0	0	0	0	0	0	0	0	0			0	-0.981512	0	0.149191	0	-0.11243	-0.377678	0	0.399422
PCM1	0	0	0	0.0596584	0	0	0	0.0574997	0			0	0	0	0	0	0	0	0	0			0	-0.0806523	0	0.180966	0	0	0	0.187553	0
PCNA	0	0	0	0.0589892	0	0	0.104143	0	0			0	0	0	0.0751546	0	0.0525024	0.19385	0	0.0667114			0	-0.0795744	0	0	0	0	0.342211	0	0
PC	0	0	0	0.0515647	0	0	0	0	0			0	0	0	0	0	0	0	0	0			0	-0.251643	0	0.223354	0	0	-0.18913	0	0
PDCD11	0	0	0	0	0	0	0	0	0			0	0	0	0	0	0	0	0	0			0.280203	0	-0.202699	0	0	0	0	0	0
PDCD1LG2	0	0	0	0	0	0	0	0	0.0873802			0	0	0	0	0	0	0	0	0			0	0	0	0	0	-0.138206	0	0	0.274831
PDE4DIP	0	0	0.0564886	0.105462	0	0.0637818	0	0	0.0982221			0	0	0.0633299	0.146277	0	0.070033	0	0.0525365	0.121295			0	0	0	0.27854	-0.250578	0.267486	-0.250906	0	0.21527
PDGFA	0	0	0	0	0	0	0	0	0			0	0	0	0	0	0	0	0	0			0	0	0	0	0	0	-0.252086	-0.212545	0
PDGFB	0	0	0	0	0	0.0762169	0.155408	0	0			0	0	0	0	0.0569583	0.0840008	0.35729	0.0559444	0			0	0	0	0	0	0.200888	0.425314	0	0
PDGFD	0	0	0	0	0	0	0	0	0			0	0	0	0	0	0	0	0	0			0	0.115724	0.215982	0	0	0	-0.406399	0	0
PDGFRA	0	0	0	0	0	0	0	0	0			0	0	0	0	0	0	0	0	0			0.146848	0	0	0	0	0	0.159129	0	0
PDGFRB	0	0	0	0	0	0	0	0	0			0	0	0	0	0	0	0	0	0			-0.133019	0	0	0	0	0	0	0	0
PDK1	0	0	0	0	0	0	0	0.0670047	0			0	0	0	0	0	0	0	0	0			0	0.0783567	0	0	0	0	-0.20891	0.151217	0
PEG3	0	0	0	0	0	0	0	0	0			0	0	0	0	0	0	0	0	0			0	-0.125854	0	-0.38594	-0.344912	0.156666	0	0	0
PER1	0	0.0561655	0	0	0	0.0827894	0	0	0			0.0597037	0.0800122	0	0	0.0504315	0.130935	0	0	0			0	0.178657	0	0	0	0.283225	0	-0.194127	0
PFDN5	0	0	0	0	0	0	0.136162	0	0			0.0612161	0.050948	0	0	0	0.0553614	0.360604	0.0572965	0.0519507			0	0	0	0	0	0	0.427009	0	0
PHB	0	0	0	0	0	0	0	0	0			0	0	0	0	0	0	0	0	0			0	-0.0752795	0	0	0	0	0	0	0
PHF1	0.0521037	0.0630902	0	0	0	0	0	0	0.126315			0	0	0	0	0	0	0	0	0			0	0.207904	-0.342426	0	-0.268459	0	-0.424449	0	0.331453
PHF23	0	0.0767199	0	0	0	0.053855	0	0	0.0730928			0	0	0	0	0	0	0	0	0			0	0.276318	0	0	0	0.163423	-0.32512	0	0.253278
PHOX2B	0	0	0	0	0	0	0	0	0			0	0	0	0	0	0	0	0	0			0	-0.10807	0	0.198025	0	0	-0.23775	0	0
PI4KA	0	0	0	0	0.0576118	0	0	0	0			0	0	0	0	0	0	0	0	0			0	0.0769255	0	0	0	0	-0.421927	0	0.216499
PICALM	0	0	0	0	0	0	0	0	0			0	0	0	0	0	0	0	0	0			0	0.292163	0	0	0	0	0	0	0
PIK3CA	0	0	0	0	0	0	0	0	0			0	0	0	0	0	0	0	0	0			0	0.173125	0	-0.19627	0	0	-0.367771	0	-0.250357
PIK3CB	0	0	0	0	0	0	0.0604443	0.0680681	0			0	0	0	0	0	0	0	0	0			-0.231745	0	0	0	0	0	0.197219	0.228349	0
PIK3CD	0	0	0	0.0562831	0.0567135	0	0.0862803	0	0			0	0	0.0530344	0.0718771	0.0731263	0.0557252	0.125408	0.0589332	0			-0.194172	0	0	0	0	0	0.236094	0	-0.285188
PIK3CG	0	0	0	0	0	0	0	0	0			0	0	0	0	0	0	0	0	0			0	-0.117188	0	0	0	-0.188117	0	0	0
PIK3R1	0	0	0.0721975	0.0668044	0	0.112243	0	0.102515	0.10321			0	0	0.0668745	0.0620298	0	0.128911	0	0.10886	0.105375			-0.14404	-0.628014	0	0	0	0.210317	-0.285746	0.209082	0.119723
PIK3R2	0	0	0	0	0	0	0.0962138	0	0			0	0	0.0633382	0	0.058386	0	0.155486	0.0574339	0			0	0	0	0	0	0	0.255994	0	0
PIM1	0	0	0	0	0	0	0	0	0			0	0	0	0	0	0	0	0	0			0	-0.0984494	0	0	0	0	-0.258185	0	0
PKM	0	0	0	0	0.102074	0	0	0	0			0	0	0	0	0.202721	0	0	0.0619544	0.0538463			0	-0.347388	0	0	0.343099	0	-0.20484	0	0
PLA2G2A	0	0	0	0	0.0799838	0	0.182114	0	0			0	0	0.0562081	0.0509458	0.0827718	0	0.373662	0.0521881	0			-0.288569	-0.115574	0	0	0	0	0.411038	0	0
PLA2G5	0	0	0	0	0	0	0	0	0			0	0	0	0	0	0	0	0	0			0.118456	-0.394226	0	0	0	-0.129678	0	-0.144718	0
PLAG1	0	0	0	0	0	0	0	0	0			0	0	0	0	0	0	0	0	0			0	0	0	0	0	0	0	0.163759	0
PLAT	0.0594717	0	0.0602797	0	0	0.0735468	0.157172	0.0635627	0			0.0603551	0	0.0609143	0	0	0.0725223	0.490114	0.0634314	0			0	0	0	0	0	0.158131	0.541811	0	0
PLCB1	0	0	0	0	0	0	0	0	0			0	0	0	0	0	0	0	0	0			0	-0.186997	0	0	0	-0.210679	0	0	-0.223714
PLCB4	0	0	0	0	0	0	0	0	0			0	0	0	0	0	0	0	0	0			0	0	0	0	0	0	0	0	0
PLCG1	0	0	0	0	0	0	0	0	0			0	0	0	0	0	0	0	0	0			0	-0.0791075	0	0	0	-0.350164	0	-0.172129	0
PLEKHM2	0	0	0	0	0	0	0	0	0			0	0	0	0	0	0	0	0	0			0	0.0758207	0	0	0	-0.114337	0	-0.168316	0
PML	0	0	0	0.0677996	0	0.08368	0	0	0			0	0	0	0.0975849	0	0.124253	0	0	0			0	0	0	0.259286	0	0.252775	0	0	0
PMS1	0	0	0	0	0	0	0.0548804	0	0			0	0	0	0	0	0	0	0	0			0.120116	0	-0.229721	0	0	0	0.20758	0	-0.255335
POFUT1	0	0	0	0	0	0	0	0	0			0	0	0	0	0	0	0	0	0			-0.194224	-0.308584	0	0	0	-0.13654	0.202218	0	0
POLD1	0	0	0	0	0	0	0	0	0			0	0	0	0	0	0	0	0	0			0.118064	0	0	0	0	-0.147736	0	0	0
POLD4	0	0	0.0550038	0	0	0.0605516	0	0	0			0	0	0	0	0	0	0	0	0			0.120515	0	0	0	0	0.18673	0	0	0
POLR2H	0	0	0	0	0	0	0	0	0			0	0	0	0	0	0	0	0	0			0	0	0	0	0	0	0.169921	0	0
POM121	0.0507813	0	0	0	0	0	0	0	0			0.0889682	0.0547081	0	0.0543387	0.0538333	0	0	0	0.0553556			0.173047	0	0	0	0	0	0	0	0
POSTN	0	0	0	0.0598725	0	0	0	0	0			0	0.0535567	0	0.0989439	0	0	0	0.055236	0			0	0	0	0.2116	0	0	0	0	0
POT1	0	0	0	0	0	0	0	0	0			0	0	0	0	0	0	0	0	0			0	0.108369	0	0	0	-0.33129	0	0	0
POU2AF1	0	0	0	0	0	0	0	0	0			0	0	0	0	0	0	0	0	0			0	-0.0921015	0	0	0	0	-0.252283	0	0
POU5F1	0	0	0	0	0	0	0	0	0			0	0	0	0	0	0	0	0	0			-0.118916	0	0	0.218375	0	0	-0.282808	0	0
PPAP2B	0	0	0	0	0	0	0	0	0			0	0	0	0	0	0	0	0	0			0	0.110879	0	0	0	0	-0.321169	0	0
PPARGC1A	0.0735029	0	0	0.106262	0.0995413	0	0	0.0881661	0.104579			0.0650407	0	0.0503258	0.115686	0.100104	0	0	0.0810529	0.113183			0	0	0	0.245893	0	0	-0.186631	0.179641	0.366312
PPFIA2	0	0	0.0532916	0	0	0	0.111661	0	0			0	0.06282	0.0668652	0.0572328	0.0560647	0	0.277503	0.0535103	0			0	0.115565	0	0	0	-0.121989	0.420413	0	0
PPFIBP1	0	0	0.0607906	0.105623	0	0	0	0.0982862	0			0	0	0.070601	0.135992	0	0	0	0.112291	0			0	-0.116485	0	0.235081	0	0	-0.171582	0.157125	0
PPM1D	0	0	0	0.0520427	0	0	0	0	0			0	0	0	0	0	0	0	0	0			0	0	0	0.188192	0	0	0	0	0
PPP1CB	0.0647877	0	0	0	0.064912	0	0	0	0			0.0840281	0.0547043	0.0595372	0.0692098	0.0892188	0	0	0	0			0.142214	0	0	0	0	-0.1867	0	-0.191267	0
PPP1R13L	0	0	0	0	0	0	0	0	0			0	0	0	0	0	0	0	0	0			-0.154565	0.119533	0	0	0	0	-0.339481	0	0
PPP2CB	0.073962	0	0.0768186	0.130537	0.092371	0.0841994	0.0917229	0	0			0.0624362	0	0.0649227	0.195692	0.0820302	0.0730575	0.0817579	0	0			0	0	0	0.345344	0	0.134719	0.173968	0	0
PPP2R1A	0	0	0	0	0	0	0	0	0			0	0	0	0	0	0	0	0	0			-0.131807	-0.229533	0	0	0	0	0	0	0
PPP2R4	0	0	0	0.135776	0	0	0	0	0			0	0	0	0	0	0	0	0	0			0	0	-0.33187	0.440068	0	0	-0.461421	0	-0.344352
PPP3CA	0	0	0	0	0	0	0	0	0			0	0	0	0	0	0	0	0	0			0	0	0	0	0	0	-0.200004	0	0
PPP3CB	0	0	0	0	0	0	0	0	0			0	0	0	0	0	0	0	0	0			0	0	0	0	0	0	-0.20142	0	0
PPP3CC	0	0.0746677	0	0.0654595	0	0	0	0.0835885	0			0	0	0	0	0	0	0	0	0			0	0.277599	0	0.197171	-0.268155	0	-0.318326	0.14777	0
PPP3R1	0	0.115652	0.0663568	0.0524005	0.0862089	0.0674503	0.0898398	0.0552683	0			0	0.171445	0.0613986	0.0523533	0.0833557	0.0623735	0.0892579	0.0539322	0			-0.168014	0.339846	0	0	0	0	0.192723	0	0
PPP3R2	0	0	0	0.0798532	0	0	0	0	0.0922424			0	0	0	0	0	0	0	0	0			0	0	0	0.234941	0	-0.168447	-0.237556	0	0.417738
PQLC3	0	0	0	0	0	0	0	0	0			0	0	0	0	0	0	0	0	0			-0.269831	0	0	0.219475	0	0	-0.186008	0	0
PRCC	0	0	0.0549252	0	0.0520384	0	0	0	0			0	0	0	0	0	0	0	0	0			-0.203871	0	0	0	0	0	0	0	0
PRKACA	0	0	0	0	0	0	0	0	0			0	0	0	0	0	0	0	0	0			-0.271355	0	0	0	0	0	0	0	-0.161126
PRKACG	0	0	0	0	0	0	0.103874	0	0			0	0	0.0631404	0	0.0595735	0	0.20497	0.0515267	0			0	0	0	-0.220898	0	-0.105114	0.322711	0	-0.196208
PRKCB	0	0	0	0	0	0	0	0	0			0	0	0	0	0	0	0	0	0			0	0	0	0	0	0	-0.202005	-0.257153	0
PRKCD	0	0	0	0	0	0	0	0.0776068	0			0	0	0	0	0	0	0	0	0			0	0	0	0	-0.254681	0	0	0.0953879	0
PRKG2	0.094997	0.123236	0	0	0.104644	0	0	0	0.0988346			0.0927008	0.142153	0	0	0.110682	0	0	0	0.0984631			0.191236	0.201521	0	-0.462383	0.289906	0	-0.190736	0	0.303632
PRMT1	0	0	0	0	0	0	0	0	0			0	0	0	0	0	0	0	0	0			0	0	0	0	0	0	0	0	0
PRMT8	0	0	0	0	0	0	0	0	0			0	0	0	0	0	0	0	0	0			-0.201853	-0.126209	0	0	0	-0.255351	0	0	0
PRRX1	0	0	0	0	0	0	0	0.0659623	0			0	0	0	0	0	0	0	0	0			-0.361061	0	0	0	0	-0.14466	-0.162243	0.150112	0
PRRX2	0	0	0	0	0	0	0	0	0			0	0	0	0	0	0	0	0	0			0	0	0	0	0	0	-0.36039	0	0
PRSS8	0	0	0	0	0	0	0	0	0			0	0	0	0	0	0	0	0	0			-0.171461	0	0	0	0	0	-0.168782	0	0
PSEN1	0	0	0	0	0.0508332	0	0	0	0			0	0	0	0	0	0	0	0	0			0	0.159593	0	0	0	0.126198	-0.178998	0	0
PSMD2	0	0	0	0	0	0	0	0	0			0	0	0	0	0	0	0	0	0			0.106243	0	0	0	-0.462593	0	-1.03573	0	0
PTGS2	0	0	0	0	0	0	0	0	0			0	0	0	0	0	0	0	0	0			-0.174025	0	0	0	0	-0.155748	-0.370261	0	0
PTK2B	0	0	0	0	0	0.0627364	0	0	0.0607493			0	0	0	0	0	0.0830481	0	0	0.0884503			0	0	0	0	0	0.139182	-0.277276	0	0.257817
PTK2	0	0	0	0	0	0	0	0.0592656	0			0	0	0	0	0	0	0	0	0			0	-0.20713	0	0	0	0	0	0.142424	0
PTK7	0	0	0	0	0	0	0	0.0733666	0.113187			0	0.0599976	0	0.0520433	0	0	0	0.0910835	0.156228			0	0.0910344	0	0	0	0	0	0.175886	0.206092
PTPN2	0	0	0.0685401	0.103592	0.0551999	0	0	0	0.0996759			0	0	0	0	0	0	0	0	0			0	0	0	0.304404	0	0	-0.206227	0	0.241898
PTPRA	0.0505942	0	0.0508231	0	0	0	0	0	0.0506987			0	0	0	0	0	0	0	0	0			0.177207	0	0	0	0	0	0	0	0
PTPRK	0	0	0	0	0	0	0	0	0			0	0	0	0	0	0	0	0	0			0	0	0.23941	0	0	-0.205484	0	0	0
PTPRO	0	0	0	0.0505984	0	0	0	0.0944822	0			0	0.0671594	0	0.0718882	0.0517277	0	0	0.112995	0			0	0.151601	0	0	0	0	-0.198733	0.14212	0
PTPRR	0	0	0	0	0	0	0	0	0			0	0	0	0	0	0	0	0	0			0.182308	0.145071	0	0	0	0	0	0	0
PTTG1	0.0534394	0	0	0	0	0	0	0	0			0	0	0	0	0	0	0	0	0			0.165908	-0.299838	-0.27379	0	0	0.127629	0	0	0
PVT1	0	0	0	0	0	0	0.190595	0	0			0	0	0	0.0571361	0	0	0.30014	0	0			-0.183392	0	0	0	0	-0.12376	0.322577	0	0
RABEP1	0.0718524	0.0882139	0.0639574	0.101427	0	0.0882644	0	0.0697457	0.110952			0.0605985	0.0758698	0.0547631	0.0992909	0	0.0765307	0	0.0584753	0.12272			0	0.200368	0	0.199388	0	0.173588	-0.220686	0	0.246889
RAC3	0	0	0	0	0	0.0617111	0	0	0			0	0.0544622	0	0.0637273	0	0.104796	0	0.0535849	0			0	0	0	0	-0.310568	0.235286	0	0	0
RAD21	0	0	0	0	0	0	0.137872	0	0			0	0	0.054725	0	0.0586432	0	0.29697	0	0			-0.128818	-0.090759	0	0	0	0	0.36835	0	0
RAD50	0	0	0	0	0	0	0	0	0			0	0	0	0	0	0	0	0	0			0	-0.127579	0	0	0	0	0	0	0
RAD51C	0	0	0	0	0	0	0	0	0.0585651			0	0	0	0	0	0	0	0	0			-0.161391	0	0	0	0	-0.193414	0	0	0.22548
RAD51B	0	0	0	0	0	0	0	0	0			0	0	0	0	0	0	0	0	0			-0.598225	0	0	0	0	-0.144678	0	0.1407	0
RAD51D	0	0	0	0	0	0	0	0	0			0	0	0	0	0	0	0	0	0			0	0.222313	0	0	0	0	0	0	0
RAD51	0	0	0	0.0551094	0	0	0	0	0			0	0	0.0596444	0.0961751	0.0526895	0	0.0512309	0	0			0	0	0	0.190251	0	0	0	0	0
RAF1	0	0	0	0	0	0	0.076679	0	0			0	0	0	0.0584749	0	0	0.117466	0	0			0	-0.14538	0	0	0	-0.231277	0.187185	0	-0.20792
RANBP17	0	0	0	0	0	0	0	0	0			0	0	0	0	0	0	0	0	0			0.109104	-0.201365	0	0	-0.240983	-0.182388	-0.249506	0	0
RANBP2	0	0	0	0.0520477	0	0	0	0	0			0	0	0	0	0	0	0	0	0			0	0	0	0.2508	0	0	-0.163145	0	0
RAP1GDS1	0	0	0	0	0	0	0.0953039	0	0			0	0.0503644	0	0	0.0523862	0	0.168765	0	0			-0.143482	0	0	-0.418398	0	-0.102092	0.260652	0	-0.223653
RARA	0	0	0	0	0	0	0	0	0			0	0	0	0	0	0	0	0	0			0	0	0	-0.217229	0	0	-0.186691	0	0
RASAL1	0	0	0	0	0	0	0	0	0			0	0	0	0	0	0	0	0	0			0.15308	-0.221322	0	0	0	0	-0.217323	0	0.168893
RASGEF1A	0	0	0	0	0	0	0	0	0			0	0	0	0	0	0	0	0	0			0	0	0	-0.347545	0	-0.145762	0	0	0
RASGRP1	0	0	0	0	0	0	0	0	0			0	0	0	0	0	0	0	0	0			0	-0.205438	0	0	0	0	-0.151701	0	0
RB1	0	0	0	0	0	0	0	0	0			0	0	0	0	0	0	0	0	0			0	-0.100325	0	0	0	0	0	0	0
RBM15	0	0	0	0	0	0	0	0	0			0	0	0	0	0	0	0	0	0			0	0	0	0	0	0	-0.408911	0	0.16749
RCOR1	0	0	0	0	0	0	0	0	0			0	0	0	0	0	0	0	0	0			0	0	0	0	0	-0.160185	0	0	0
REEP3	0	0	0	0	0	0	0	0	0			0	0	0	0	0	0	0	0	0			0	-0.26471	0	0	0	0	-0.286065	0	0
RELA	0	0	0	0	0	0	0	0	0			0	0	0	0	0	0	0	0	0			0	0.102355	0	0	0	0	0	0	-0.179157
RELN	0	0	0.063244	0.0687347	0.106564	0.0534347	0	0.0620489	0.102149			0	0	0.0618182	0.0665697	0.141904	0.0550077	0	0.0608298	0.127187			0	0	0	0	0.29142	0	-0.165641	0	0.264854
RERG	0	0	0	0	0	0	0	0	0			0	0	0	0	0	0	0	0	0			-0.233994	-0.19801	0	0.166284	0	-0.122726	0	0	-0.187928
RET	0.0592417	0	0	0	0	0.0957499	0	0.0675995	0			0.0704361	0	0.0571915	0.0578151	0	0.136328	0	0.0801202	0			0.121582	0	0	0	0	0.26111	-0.298514	0.166253	-0.216503
RGS7	0	0	0	0	0	0	0	0	0			0	0	0	0	0	0	0	0	0			0.176852	0	0	0	0	0	0	0	-0.190717
RHOA	0	0.0629712	0	0.0727976	0	0	0	0	0			0.0517233	0.0921933	0	0.101192	0	0	0.0503794	0	0.0501924			0	0.21263	0	0.177321	0	-0.185143	0	0	0
RHOD	0	0.0604462	0	0	0	0	0	0	0.0854101			0	0	0	0	0	0	0	0	0			0	0.188566	0	0	0	0	0	-0.230307	0.386303
RHOH	0	0	0	0.0707474	0	0	0	0	0.0680064			0	0.0510411	0.0654545	0.0970732	0	0	0	0.05562	0.0920197			-0.142555	0	0	0.209524	0	0	0	0	0.186935
RICTOR	0	0	0	0	0	0	0	0	0			0	0	0	0	0	0	0	0	0			0	0.0822325	0	0	0	0	0	0	0
RLTPR	0	0	0	0	0	0	0	0	0			0	0	0	0	0	0	0	0	0			0.247913	0	0	0	0	0	-0.288668	0	0.363747
RNF213	0	0	0	0.0564111	0	0	0	0	0			0	0	0	0	0	0	0	0	0			0	0.151737	0	0.170071	0	0	-0.228885	-0.263848	0
RNF43	0	0	0	0	0	0	0	0	0.0537646			0	0	0	0	0	0	0	0	0			-0.189255	0.270179	0	0	0	0	0	0	0.301544
ROBO1	0	0	0	0	0	0	0	0	0			0	0	0	0	0	0	0	0	0			-0.761909	-0.116996	0	0	0	0	-0.409527	-0.274305	0
ROBO2	0	0	0	0	0	0	0	0.0580785	0			0	0	0	0	0	0	0	0	0			0	0	0	0	0	0	0	0.179087	0
ROS1	0.0717785	0	0	0	0.0543659	0.106051	0.0642224	0	0			0.0822213	0	0	0	0.0657205	0.166139	0.0734944	0	0			0.183994	-0.223945	0	0	0	0.331381	0	0	-0.203746
RPA3	0	0	0	0	0	0	0	0	0			0	0	0	0	0	0	0	0	0			0.14098	-0.16933	0	0	0	0	0	0	0
RPL22	0	0	0	0	0	0	0	0	0			0	0	0	0	0	0	0	0	0			0	0	0	0	0	0.171653	0	0	0
RPN1	0	0	0	0	0	0	0	0	0			0	0	0.0525292	0.0694321	0.0795551	0	0	0	0			0	0	0	0	0	0	0	0	0
RPN2	0	0	0	0	0	0	0	0	0			0	0	0	0	0	0	0	0	0			0.131892	-0.071526	0	0	0	0	-0.332093	0	0
RPS21	0	0	0	0	0	0	0	0	0			0	0	0	0	0	0	0	0	0			-0.234693	0	-0.205481	-0.238763	0	-0.2548	0	0	0
RPS6KA1	0	0	0	0	0.0788699	0	0	0	0			0	0	0	0	0	0	0	0	0			0	-0.133409	0	0	0.434842	0	-0.357908	0	0
RPS6KA2	0	0	0	0	0	0	0	0	0			0	0	0	0	0	0	0	0	0			0	0	0	-0.203839	0	0.140109	-0.282057	0.148955	0
RREB1	0	0	0	0	0	0	0	0.0599532	0			0	0	0	0	0	0	0	0	0			-0.163155	0	0	0	0	0	-0.195211	0.206618	0
RRM2B	0	0	0	0	0.0866813	0	0	0	0			0	0	0.059399	0	0.153941	0	0	0	0			0	0	0	0	0.315556	0	-0.158738	0	0
RTN3	0	0	0	0	0	0	0	0	0			0	0	0	0	0	0	0	0	0			0	-0.091538	0	-1.1132	0	0.177569	0	0	0
RUNX1T1	0.0572729	0	0	0	0	0	0	0	0			0.0807142	0	0.0518691	0	0	0	0	0	0			0.125227	-0.199629	0	0	0	0	-0.190661	0	0
RUNX2	0.101918	0	0	0	0	0	0	0	0			0.179107	0.0549867	0	0	0	0	0	0	0			0.310231	0	0	0	-0.462591	0	-0.347206	0	-0.246479
RYR3	0	0	0.0515534	0.0760598	0.0700502	0.0699398	0	0.05811	0			0	0	0	0	0	0	0	0	0			0	-0.0719016	0	0.264411	0	0.140874	0	0	0
SARNP	0	0	0	0.0771252	0	0	0	0	0			0	0.0628895	0.0563754	0.128041	0	0	0	0	0			0	0.117503	0	0.280674	0	0	-0.231162	0	-0.190382
SCN8A	0.0504844	0	0	0	0	0	0	0	0.10828			0	0	0	0	0	0	0	0	0			0.104571	-0.186572	0	0	0	0	-0.274239	0	0.347861
SDC4	0	0	0	0	0	0	0	0	0			0	0	0	0	0	0	0	0	0			0	0	0	0	0	0	-0.349521	0	0
SDHAF2	0	0	0	0	0	0	0	0	0			0	0	0	0	0	0	0	0	0			0	0	0	0	0	0	-0.160359	0	0
SDHA	0	0	0	0	0	0	0	0.0637115	0			0	0.0501025	0	0	0	0	0	0.101325	0			0	0	0	0	0	0	0	0.190543	0
SEPT2	0.0650172	0	0	0.107771	0.117386	0	0.0909156	0.102668	0			0.0593115	0	0	0.115139	0.143192	0	0.0863401	0.10361	0			0	0	0	0.251959	0.298036	0	0.121293	0.24026	0
SEPT5	0	0	0	0	0	0	0	0	0			0	0	0	0	0	0	0	0	0			0	0	0	0	-0.264903	0.204159	0	0	-0.185625
SEPT6	0	0	0	0	0	0	0	0	0			0	0	0	0	0	0	0	0	0			-0.228642	0	0	0	0	0	0.191386	0	0
SEPT9	0	0	0	0	0	0	0	0	0			0	0	0	0	0	0	0	0	0			0	-0.204084	0	0	0	0	-0.242458	0	0
SERPINE1	0.112207	0.0768013	0.0700253	0.11962	0.0976147	0	0	0	0.119256			0.11027	0.0611107	0.0567885	0.12951	0.0820557	0	0	0	0.126978			0.220781	0.0996983	0	0.25342	0	-0.158317	-0.214956	0	0.211512
SERPINF1	0	0	0	0	0	0	0.0907855	0	0			0	0	0	0.0530895	0.0618467	0	0.154379	0	0.0535336			0	-0.0826223	0	0	0	0	0.258052	0	0
SETBP1	0	0	0	0.0572441	0	0	0	0	0			0	0	0	0	0	0	0	0	0			0	-0.158552	0	0.268959	0	0	-0.395568	0	0
SETD7	0	0	0	0	0	0	0	0	0			0	0	0	0	0	0	0	0	0			0.312441	0.124598	0	0	0	0	0	0	-0.399884
SET	0	0	0	0	0	0	0	0	0			0	0	0	0	0	0	0	0	0			0	-0.0570524	0	0	0	0	-0.18589	0	0
SF3B1	0	0	0	0	0	0	0	0	0			0	0	0	0	0	0	0	0	0			0	0.123325	0	0	0	0	-0.354717	0	0
SFRP2	0	0	0	0	0	0	0	0	0			0	0	0	0	0	0	0	0	0			0.214613	0.193494	0	0	0	0	0	0	0
SUGP2	0	0	0	0	0	0	0	0	0			0	0	0	0	0	0	0	0	0			0	-0.0904765	0	0	0	0	0.188398	0	0
SRSF2	0	0	0	0	0	0	0	0	0			0	0	0	0	0	0	0	0	0			0	0	0	0	0	0	-1.52904	0.110988	0
SRSF3	0	0	0	0.0717311	0	0	0	0	0			0	0	0.0609366	0.115496	0	0	0	0.0539528	0			-0.179902	0	0	0.261765	0	0	0	0	0
SGK1	0	0	0	0	0.068119	0	0	0	0.0761979			0	0.0512953	0.0574476	0	0.0998928	0	0.0514975	0	0.126708			-0.146195	0	0	0	0	0	0	0	0.313613
SGPP2	0	0	0	0	0	0	0	0	0			0	0	0	0	0	0	0	0	0			-0.142766	-0.196869	0	0	0	0	0.611027	0	0
SH2D5	0	0	0	0	0	0	0.0847221	0	0			0	0.0523214	0	0.0634187	0.0521735	0	0.153211	0	0.0559555			-0.174708	0	0	0	0	0	0.269902	0	0
SH3BP1	0.0544687	0	0	0	0	0	0	0	0.0566189			0	0	0	0	0	0	0	0	0			0.151248	0	0	0	0	0	-0.280964	0	0.128115
SH3D19	0	0	0	0	0	0	0.0574267	0	0			0	0	0	0	0	0	0	0	0			0	0	0	0	0	0	0.250836	0	0
SH3GL2	0	0	0	0	0	0	0	0	0			0	0	0	0	0	0	0	0	0			0	0	0	0	0	0.148555	-0.308051	0	-0.231338
SHC1	0	0	0.0727732	0.107477	0	0	0.159452	0	0			0	0.0516473	0.0712164	0.12565	0	0	0.321795	0	0			-0.121845	0	0	0.241689	0	-0.14753	0.39494	0	0
SIN3A	0	0	0	0	0	0	0	0	0			0	0	0	0	0	0	0	0	0			0	-0.119787	0	0	0	0.119401	0	0	-0.355506
SIRT1	0.0962213	0	0.0650479	0.072859	0.112587	0	0	0	0			0.104346	0	0.0679009	0.0758911	0.165756	0.051784	0	0	0			0.137534	-0.180765	0	0.247673	0.318198	0	0	-0.164461	0
SLC1A2	0	0	0.0843917	0.0626493	0.120845	0.0746759	0.142969	0.103847	0.0893056			0	0	0.0626762	0	0.127134	0.056411	0.240389	0.0866372	0.0667273			-0.206456	-0.161842	0	0	0.294682	0	0.377404	0.196696	0
SLC45A3	0	0	0	0	0	0	0	0	0			0	0	0	0	0	0	0	0	0			0	0	0.19198	-0.17969	0	0	0	0	0
SLC7A5	0	0	0	0	0	0	0	0	0			0	0	0	0	0	0	0	0	0			0	0.0595052	0	0	0	0	0	0	0
SLCO1B3	0	0	0	0	0	0	0	0	0			0	0	0	0	0	0	0	0	0			0	0	0	0	0	-0.205595	0	0	-0.151255
SMAD4	0	0	0	0	0	0	0	0	0			0	0	0	0	0	0	0	0	0			0	0	0	-0.494014	0	0	-0.146175	0	0
SMAD6	0	0	0	0	0	0	0	0	0			0	0	0	0	0	0	0	0	0			0.167072	-0.120128	0	0.256716	0	0	-0.213164	0	0
SMARCA1	0	0	0	0	0.0634427	0	0	0	0			0	0	0	0	0	0	0	0	0			0	0	0	0	0	0	0	0	0
SMARCA4	0	0	0	0	0	0	0	0	0			0	0	0	0	0	0	0	0	0			0	0	0	0	0	0	0	-0.212647	0
SMARCA5	0	0	0	0	0	0	0	0	0			0	0	0	0	0	0	0	0	0			0	-0.130759	0	0	-0.481371	0	0	0	0
SMARCB1	0	0	0	0	0	0	0.0643002	0	0			0	0.0635386	0.05198	0	0.0625484	0.0507162	0.113304	0	0.0536976			0	0.478718	0	0	0	0	0.216244	0	0
SMC1A	0	0	0	0	0	0	0	0	0			0	0	0	0	0	0	0	0	0			0	-0.165431	0	0	0	0	-0.314327	0	0
SMC3	0	0	0	0	0	0	0	0	0			0	0	0	0	0	0	0	0	0			0	-0.338968	0	0	0	0	0	0	0
SNAPC3	0.0511891	0	0.0505191	0	0	0	0	0	0			0	0	0	0	0	0	0	0	0			0.146385	0.116868	0	-0.185992	0	0	-0.306525	0	-0.356336
SNHG5	0	0	0	0	0	0	0.110925	0	0			0	0	0.0532641	0	0.0567171	0	0.200406	0	0			0	0	0	0	0	0	0.291268	0	0
SNW1	0	0	0	0	0	0	0	0	0			0	0	0	0	0	0	0	0	0			-0.17854	0.0918166	-0.222738	0	0	-0.181614	0	0	0
SNX9	0	0	0	0.0532427	0	0	0	0	0			0	0	0	0	0	0	0	0	0			0	-0.229557	0	0.166735	0	0	0	0	0
SOCS1	0	0	0	0	0	0	0.0630921	0	0			0	0	0	0	0	0	0	0	0			-0.182692	-0.119842	0	0	0	0	0.224102	0	0
SOCS2	0	0	0	0	0	0	0	0	0			0	0	0	0	0	0	0	0	0			0	-0.189347	0	0	0	-0.108719	0	0	0
SORBS2	0	0	0	0	0	0	0	0	0			0	0	0	0	0	0	0	0	0			0	0	0	0	0	-0.167686	0	0	0
SORT1	0	0	0	0	0	0	0	0	0			0	0	0	0	0	0	0	0	0			-0.149045	-0.137035	0	0	0	0	0	0	-0.230616
SOX11	0	0	0	0	0	0	0	0	0			0	0	0	0	0	0	0	0	0			0.522364	0	-0.244042	0	0	0	0	0	0
SOX2	0	0	0	0	0	0	0	0	0			0	0	0	0	0	0	0	0	0			0	-0.37427	0	-0.318671	0	-0.205601	0.189168	0	0
SP1	0	0	0	0	0.0706448	0	0	0	0			0	0	0	0	0	0	0	0	0			0	0	0	0	0.267709	0	-0.232963	0	0
SP3	0	0	0	0	0	0	0	0	0			0	0	0	0	0	0	0	0	0			0	0	0	0	0	0	0	-0.197306	0
SPOP	0	0	0	0	0	0	0.0515134	0	0			0	0	0	0	0	0	0	0	0			-0.137234	-0.269786	0	0	0	0	0.193426	0	-0.265561
SPP1	0.0562817	0	0	0	0	0	0	0	0			0	0	0	0	0	0	0	0	0			0.192505	0	0	0	0	0	-0.401581	0	0
SPRY2	0	0.0519655	0	0	0.0940209	0.110538	0	0	0.0817621			0.0553084	0.0583899	0	0	0.111767	0.174085	0	0	0.0886591			0	0.0783826	0	0	0.26826	0.356887	0	0	0.274067
SPRY4	0	0	0	0	0	0	0	0	0			0	0	0	0	0	0	0	0	0			-0.139604	-0.193534	0	-0.325044	0	0	-0.143469	0	0
SPTAN1	0	0	0	0	0	0	0	0	0			0	0	0	0	0	0	0	0	0			0	0.0856865	0	0	0	-0.134653	-0.245909	-0.175861	0
SPTBN1	0.0536176	0	0	0	0	0	0	0	0			0.0862522	0.0510837	0	0.0510419	0	0	0	0	0			0.154205	0	0	0	0	0	-0.442493	0	-0.275101
SRC	0	0	0	0	0	0	0	0	0			0	0	0	0	0	0	0	0	0			0.276822	0.126874	0	-0.290511	0	0	-0.17661	0	0
SRF	0	0	0	0	0	0	0	0	0			0	0	0	0	0	0	0	0	0			0	-0.0786873	0	0	0	0	-0.358445	0	0
SRGAP3	0	0	0	0	0.0619936	0	0	0	0			0	0	0.069942	0	0.100919	0	0	0.0544631	0			0	0	0	0	0	0	0	0	0
SRRM3	0	0	0	0	0	0	0	0	0			0	0	0	0	0	0	0	0	0			0	0	0	0	0	0	-0.225238	0	0
SS18L1	0	0	0	0	0	0	0.111824	0	0			0.054941	0	0.0660636	0.0527829	0	0	0.240696	0	0			0	0	0	0	0	0	0.352917	0	0
SS18	0	0	0	0	0	0	0	0	0			0	0	0	0	0	0	0	0	0			-0.208499	0	0	0	0	-0.110612	0	-0.134659	0
SSBP2	0	0	0	0.0593604	0	0.0540558	0	0	0			0	0	0	0	0	0	0	0	0			0	0.118257	0	0.228509	0	0.166373	-0.287085	0	0
SSX1	0	0	0	0.0646842	0	0	0	0	0.0556594			0	0	0	0	0	0	0	0	0			0	0	0	0.193519	0	0.138054	-0.188994	0	0.179445
SSX2	0	0.0750057	0	0	0	0	0	0	0			0	0	0	0	0	0	0	0	0			0	0.261055	0	-0.24897	0	0	0	-0.143474	0.215105
SSX4	0	0	0	0	0	0	0	0	0			0	0	0	0	0	0	0	0	0			0	0	0	0	0	0.124275	-0.261727	0	0
STAG2	0	0	0	0.1712	0	0.0510514	0	0	0.094919			0	0	0	0.297998	0	0.0585012	0	0	0.107734			0	0	0	0.365858	0	0	0	0	0.261072
STAT1	0	0	0	0	0	0	0	0	0			0	0	0	0	0	0	0	0	0			0	0	0	0	0	0	0	0	0
STAT3	0	0	0	0	0	0	0	0	0			0	0	0	0	0	0	0	0	0			-0.198749	0	0	0	-0.424535	0	0	0	0
STAT4	0	0	0	0	0	0	0	0	0			0	0	0	0	0	0	0	0	0			0	-0.172859	0	0	0	0	0	0	0
STAT5A	0	0	0	0	0	0	0.128403	0	0			0.0521463	0.0654919	0	0.0525905	0	0	0.261354	0	0			0	0.148132	0	0	0	-0.144637	0.341704	0	-0.199174
STAT5B	0	0	0	0.0531039	0	0	0	0	0			0	0.0560853	0.0556985	0.0737593	0	0	0	0	0			-0.542536	0	0	0.0956283	0	0	0	0	-0.167978
STIL	0	0	0	0	0	0	0	0	0			0	0	0	0	0	0	0	0	0			0	0.0952623	0	0	0	-0.282591	0	0	0
STK11	0	0	0	0	0	0	0	0	0			0	0	0	0	0	0	0	0	0			0	0.0455033	0	0	0	0	0	0	-0.159465
STRN	0	0	0	0	0	0	0	0	0			0	0	0	0	0	0	0	0	0			0	0.0862427	0	0	0	0	0	0	0
STYK1	0.0643038	0	0	0	0	0	0	0.0507308	0			0	0	0	0	0	0	0	0	0			0.223989	0	0	-0.240179	-0.24512	0	0	0.16373	0
SUFU	0	0	0	0	0.0818798	0	0	0	0			0	0	0.0609205	0	0.19055	0.0540256	0	0.059253	0			0	0	0	0	0.375102	0	0	0	0
SULF1	0	0	0	0	0	0	0	0	0			0	0	0	0	0	0	0	0	0			0	0	0	-0.279334	0	0	0.181659	0.177845	0
SUV39H2	0	0	0	0	0	0	0	0	0			0	0	0	0	0	0	0	0	0			0	0.18882	0	0	0	0	0	0	0
SUZ12	0	0	0	0	0	0.0677829	0	0	0.0891639			0	0	0	0	0	0	0	0	0			0	-0.526423	0	0	0	0.150637	-0.159026	0	0.25894
SYK	0	0	0	0	0	0	0	0	0			0	0	0	0	0	0	0	0	0			0	-0.191127	0	0	0	0.235631	-0.401729	0	0
SYP	0	0.0676314	0	0.121402	0	0	0	0	0			0.0621165	0.0781906	0	0.24001	0	0.0599242	0	0	0.0510817			0	0.132199	0	0.370829	0	0	0	0	0
TACC2	0	0	0	0	0	0	0	0	0			0	0	0	0	0	0	0	0	0			0	0.0868974	0	0	0	0	0.25255	0	0
TACC3	0	0	0	0	0	0	0	0	0			0	0	0	0	0	0	0	0	0			-0.197955	0.127339	0	0	0	0	0	0	0
TAF15	0	0	0.0722717	0.0690815	0	0	0	0	0			0	0	0	0	0	0	0	0	0			0	-0.0904208	0.200466	0.21406	0	0	-0.158824	0	-0.220943
TAL1	0	0	0	0	0	0	0	0.0824786	0			0	0	0	0	0	0	0	0	0			0	-0.152075	0	0	0	0	-0.302481	0.171837	0
TAL2	0.083814	0	0	0	0	0.0514395	0	0	0			0.115566	0	0	0.0656262	0	0.0728775	0	0	0.0609798			0.21324	0	0	0	-0.315405	0.177402	-0.367069	0	0.675062
TCEA1	0	0	0	0	0	0	0	0	0			0	0	0	0	0	0	0	0	0			0	0	0	0	0	0	0	0	0
TCF12	0	0	0	0.100065	0.0947745	0	0	0	0			0	0	0	0	0	0	0	0	0			0	0	0	0.297471	0.287167	0	-0.251363	0	0
TCF3	0.0500443	0	0	0	0.0651617	0.0658134	0	0	0			0	0	0	0	0	0	0	0	0			0.0929464	0.0943344	-0.200795	0	0	0.159173	0	0	-0.321402
TCL1A	0	0	0	0	0	0	0.0641232	0	0			0	0	0	0	0	0	0	0	0			-0.279677	-0.196614	0	0	0	-0.244952	0.237757	0	0
TCL6	0	0	0	0	0	0	0	0	0.0735219			0	0	0	0	0	0	0	0	0			0	-0.150255	0	0	0	0	0	0	0.276268
TCTA	0	0	0	0	0	0	0.120293	0	0			0	0	0	0	0	0.0620047	0.222187	0	0			0	-0.154611	-0.223799	-0.259814	-0.283599	0	0.328177	-0.222611	-0.251254
TEAD2	0	0	0	0	0	0	0	0	0			0	0	0	0	0	0	0	0	0			0	0	0	0	-0.357077	-0.224256	0	0	0
TEAD3	0	0	0	0	0.0515763	0	0	0	0			0	0	0	0	0	0	0	0	0			0	0	0	0	0	0	-0.279388	0	0
TEAD4	0	0	0	0	0	0	0	0	0			0	0	0	0	0	0	0	0	0			0	0	0	0	0	0	0	0	0
TEC	0	0	0	0	0.0564491	0	0	0	0.103414			0	0	0	0	0	0	0	0	0			0	-0.146643	0	0	0	0	-0.134743	0	0.347678
TERF1	0	0	0	0	0	0	0	0	0.0542886			0	0	0	0	0	0	0	0	0			0	0	0	0	0	0	-0.177794	0	0.209454
TERF2	0	0	0	0.0526514	0	0	0.0875655	0	0			0	0	0.0536771	0.0740565	0	0	0.134368	0	0			0	-0.201671	0	0	0	0	0.258889	0	-0.255864
TERT	0	0	0	0	0	0	0	0	0			0	0	0	0	0	0	0	0	0			0	0	0	0	0	0	-0.400525	0	0
TFDP1	0	0	0	0	0	0	0	0	0			0	0	0	0	0	0	0	0	0			0	0	0	0	0	0	-0.368894	0	0
TFEB	0	0	0	0	0	0	0	0	0			0	0	0	0	0	0	0	0	0			0	-0.146534	0	0	0	0	0	0	0
TFG	0	0	0	0	0	0	0	0	0			0	0	0	0	0	0	0	0	0			0	0	0	0	0	0	-0.280066	0	0
TFPT	0	0	0	0.105239	0	0	0	0	0			0	0	0.0506555	0.324171	0	0.0575376	0	0	0.0719618			0	-0.162276	0	0.532404	0	0	0	0	0
TFRC	0.0611134	0	0	0.0722337	0	0.110343	0	0	0.083563			0.0647025	0.0506641	0.0525783	0.0755869	0	0.144618	0	0.055695	0.0920919			0	-1.03765	0	0.179032	0	0.218822	-0.287701	0	0.23394
TGFB2	0	0	0	0	0	0	0	0	0			0	0	0	0	0	0	0	0	0			0	-0.0971511	0	0	0	0	-0.207697	0	0.22091
TGFB3	0	0	0	0	0	0	0	0	0			0	0	0	0	0	0	0	0	0			-0.226598	0	0	-0.245243	0	0	0	0	0
TGFBI	0	0	0	0	0	0	0	0	0			0	0	0	0	0	0	0	0	0			-0.141932	0	0	0	0	0	-0.27505	0	0
TGFBR2	0.0552022	0	0	0.0590005	0	0	0	0	0			0.0875639	0.0500608	0.0520437	0.0947515	0	0	0	0	0.0503713			0.168458	0	0	0.194216	0	0	-0.22275	0	0
TGFBR3	0	0	0	0	0	0	0	0	0.0538781			0	0	0	0	0	0	0	0	0			0.13056	0	0	0	0	0	0	0	0.205429
THADA	0	0	0	0	0	0	0	0	0			0	0	0	0	0	0	0	0	0			0	-3.2363	0	0	0	0	-0.2333	0	-0.361226
THBS1	0	0	0	0	0	0	0	0	0			0	0	0	0	0	0	0	0	0			0	0	0	0	0	0	0	0	0
THRAP3	0	0	0	0	0	0	0	0	0			0	0	0	0	0	0	0	0	0			0	0	0	0.244947	0	0	-0.316014	0	0
TIAM1	0	0	0	0	0.0684314	0	0	0	0			0	0	0.0678971	0	0.105994	0	0	0	0.0521217			0	-0.0927988	0	0	0.256556	-0.168164	0	0	0
TLR4	0	0	0	0	0	0	0	0	0			0	0	0	0	0	0	0	0	0			0	-0.129556	0	0	-0.48876	0	-0.243175	0	0
TLX1	0	0.0682514	0	0.0551011	0	0	0	0	0			0	0.0955076	0.061451	0.0776859	0.054958	0.0515768	0	0	0.0608545			0	0.198735	0	0.176113	0	0	-0.310333	0	0
TLX3	0	0	0	0	0	0	0	0	0.110039			0	0	0	0	0	0	0	0	0			0	-0.146754	0	0	0	0	-0.187446	0	0.421466
TMEM127	0	0	0	0	0	0	0.107456	0	0			0	0	0	0	0.0558752	0.0588883	0.221096	0	0.0672505			0	-0.293081	0	0	0	0	0.362446	0	0
TMEM30A	0	0	0	0	0	0	0	0	0			0	0	0	0	0	0	0	0	0			0	0	0	0	0	0	0	0	-0.306135
TNC	0	0	0	0	0	0	0	0	0			0	0	0	0	0	0	0	0	0			0.154843	-0.0994358	0	0	0	0	0	0	0
TNFAIP3	0	0	0	0	0	0	0	0	0			0	0	0	0	0	0	0	0	0			-0.14803	0.138665	-0.421284	0	0	-0.241016	-0.199508	0	0
TNFRSF10B	0	0	0	0	0	0	0	0	0			0	0	0	0	0	0	0	0	0			0.167838	-0.290384	-0.213852	0	0	0	0	0	0
TNFRSF10D	0	0.0864133	0.0756762	0.134426	0.115865	0.0988608	0	0.126174	0			0	0	0	0	0	0	0	0	0			-0.197802	0.134033	0	0.237223	0.305505	0.164843	-0.216612	0.161307	0
TNFRSF17	0	0	0	0	0	0	0	0	0			0	0	0	0	0	0	0	0	0			0.112319	0	0	0	0	0	0	0	0
TNF	0	0	0	0	0	0	0	0	0			0	0	0	0	0	0	0	0	0			0	-0.271176	0	-0.461016	0	-0.235859	0	0	-0.268508
TOP1	0	0	0	0	0	0	0	0	0			0	0	0	0	0	0	0	0	0			-0.135318	0	0	0	0	0	0.168241	0	-0.25691
TOP2A	0	0	0	0	0	0	0	0	0			0	0	0	0	0	0	0	0	0			0	-0.103819	0	0	-0.398945	-0.269561	0	0	0
TOP2B	0	0	0	0	0.0753994	0	0	0	0			0	0.0509888	0	0	0.121281	0	0	0	0.0543736			-0.145406	0	0	0	0.283981	-0.170949	-0.221351	0	0
TP53BP1	0	0	0	0	0	0	0	0	0			0	0	0	0	0	0	0	0	0			0.140989	-0.109797	0	-0.174532	0	0.13772	0.159631	0	-0.227414
TP73	0	0	0	0.0542547	0	0	0	0	0			0	0	0	0	0	0	0	0	0			-0.159429	-0.474377	0	0.263493	0	0	-0.276003	0	0
TPM4	0.0586563	0	0	0	0	0.107232	0	0	0			0.0721659	0	0.0663321	0	0.0608491	0.191663	0	0	0			0.132569	-0.159822	0	0	0	0.352369	-0.267398	0	0
TPO	0	0	0	0	0	0	0	0	0.050585			0	0	0	0	0	0	0	0	0			0	-0.0644096	0	0	0	0	-0.373892	0	0.206592
TPR	0	0	0	0	0	0	0.0616974	0	0			0	0	0	0	0	0	0	0	0			0	0	0	0	0	-0.133441	0.236662	0	-0.304252
TRAF3	0	0	0	0	0	0	0	0	0			0	0	0	0	0	0	0	0	0			0	-0.0908507	0	0	0	0	0	0	0
TRAF5	0	0	0	0	0	0	0	0	0			0	0	0	0	0	0	0	0	0			0	-0.677621	0	0	0	0	0	0	0
TRHDE	0	0	0	0	0	0	0	0	0			0	0	0	0	0	0	0	0	0			0	0.607919	0	0	0	0	-0.439685	0	0
TRIM27	0	0	0	0	0	0	0	0	0			0	0	0	0	0	0	0	0	0			0	-0.138425	0	0	0	0	0	0	0
TRIM33	0	0	0	0	0	0	0	0	0			0	0	0	0	0	0	0	0	0			-0.14379	0	0	0	-0.278837	0.141521	0	-0.238344	-0.216076
TRIP11	0	0	0	0	0	0	0	0	0			0	0	0	0	0	0	0	0	0			0	-0.313093	0	0	0	-0.17995	0	0	-0.272842
TRPS1	0	0	0	0	0	0	0	0	0			0	0	0	0	0	0	0	0	0			0	-0.198627	0	0	0	-0.190704	0	0	-0.215868
TSC1	0	0	0	0	0	0	0	0	0			0	0	0	0	0	0	0	0	0			-0.144548	-0.336728	0	0	0	0	0	0	0
TSHR	0	0	0	0	0	0	0	0	0			0	0	0	0	0	0	0	0	0			0	0	0	0	0	0	-0.316448	0	0
TTK	0	0	0	0	0	0	0	0	0			0	0	0	0	0	0	0	0	0			-0.191845	0.115992	0	0	0	0	0	0	0
TTL	0	0	0	0	0	0	0	0	0			0	0	0	0	0	0	0	0	0			0.199408	0	0	0	-0.240324	0	0.155922	0	0
U2AF2	0	0	0	0	0	0	0	0	0			0	0	0	0	0	0	0	0	0			0	0.191439	0	0	0	0	0	0	0
UBE2B	0	0	0	0	0	0	0	0	0			0	0	0	0	0	0	0	0	0			0	0	0	0	0	0	-0.25567	0	0
UBE2C	0	0	0	0	0	0	0	0	0			0	0	0	0	0	0	0	0	0			0.167927	0	0	0	-0.369389	0	-0.508305	-0.145979	0
USP16	0	0	0	0	0	0	0	0	0			0	0	0	0	0	0	0	0	0			0	-0.0921876	0	0	0	0	-0.301216	0	0.256674
USP42	0	0	0	0	0	0	0	0	0			0	0	0	0	0	0	0	0	0			0	0	0	0	0	-0.125719	-0.353064	0.174227	0
USP5	0	0	0	0	0.0573445	0	0.0838609	0	0			0	0.0628025	0.0666175	0.0513543	0.0753424	0	0.126959	0	0			0	0.0900219	0	0	0	0	0.295038	0	0
USP7	0	0	0	0.0536926	0.0667218	0	0	0	0			0	0	0	0	0	0	0	0	0			0	0	0	0.191093	0	0	-0.196457	0	0
VCAM1	0	0	0	0	0	0	0	0	0			0	0	0	0	0	0	0	0	0			-0.113823	0	0	0	-0.228977	0	-0.209603	0	0
VEGFA	0	0	0	0	0	0	0	0	0			0	0	0	0	0	0	0	0	0			0	0.105766	-0.187202	-0.337538	0	-0.119639	0	0	0
VEGFC	0.0592121	0	0	0.08993	0	0	0	0.0574557	0.0948085			0.0681999	0	0	0.11209	0	0.0523224	0	0.0662289	0.135978			0.150633	-0.197978	0	0.205433	0	0	-0.160279	0	0.301071
VHL	0	0	0	0	0	0.051339	0	0	0			0	0	0	0	0	0	0	0	0			0	0	0	0.194665	0	0.158055	0	0	-0.220129
VTI1A	0	0	0	0.0521369	0	0	0.115405	0.082915	0			0	0.0525024	0.0500785	0.0624761	0.0565896	0	0.240895	0.0977517	0			0	0	0	0	0	0	0.368591	0.16495	0
WASF2	0	0	0.0520303	0	0	0	0	0	0			0	0	0	0	0	0	0	0	0			0	0.0584041	0.192909	0	0	0	-0.332044	0	0
WDFY3	0	0	0	0	0	0	0.170444	0	0			0	0	0	0	0	0	0.332385	0	0			0	-0.141671	0	-0.186913	0	0	0.399559	0	-0.279679
WDR18	0	0	0	0	0	0.064003	0.0807215	0	0			0	0.0585039	0	0.0659144	0	0.0814377	0.115437	0	0.0666896			0	0.10995	0	0	0	0.171829	0.258027	0	0
WDR1	0	0	0	0	0	0	0.0678057	0	0			0	0	0	0	0	0	0	0	0			0	0.217303	0	0	0	0	0.249262	0	0
WDR70	0	0	0	0	0	0	0.136279	0	0			0	0.0562109	0.0646322	0	0.0605802	0	0.187792	0	0.0502522			-0.136806	0	0	-0.186794	0	-0.175237	0.209774	0	0
WEE1	0	0	0	0	0	0	0	0	0			0	0	0	0	0	0	0	0	0			0.327249	0.127565	0	0	0	0	0	0	0
WHSC1L1	0	0	0	0	0	0	0	0.0564963	0			0	0	0	0	0	0	0	0	0			-0.127005	0.20821	0	0	0	-0.283621	0	0.174875	0
WHSC1	0	0	0	0	0	0	0	0	0			0	0	0	0	0	0	0	0	0			-0.207896	-0.221383	0	0	0	-0.220841	0	0	0
WIF1	0	0	0	0	0	0	0	0	0			0	0	0	0	0	0	0	0	0			0	-0.0933241	0	0	0	-0.120928	0	0	0
WISP3	0	0	0	0	0	0	0	0	0			0	0	0	0	0	0	0	0	0			0.0963183	0	-0.213664	0	0	0	0	0	0
WNT10A	0	0	0	0	0	0	0.0933048	0	0			0.0548986	0.0503531	0	0	0.0544925	0	0.149954	0	0			0	0	0	0	0	0	0.232405	0	0
WNT11	0	0	0	0	0	0	0	0	0.066688			0	0	0	0	0	0	0	0	0			0	0	0	0	0	0	-0.223137	0	0.506716
WNT16	0	0	0	0	0	0	0	0	0			0	0	0	0	0	0	0	0	0			-0.284774	0	0	0	0	0.133578	0	0	0
WNT2B	0	0	0	0.0554953	0	0	0	0	0			0	0	0.0510434	0.0809805	0	0	0	0	0.0544903			0	0	0	0.120668	0	0	0	0	0
WNT3	0	0	0	0.0565287	0	0	0	0	0			0	0	0	0	0	0	0	0	0			0	0	0	0.194775	-0.286632	0	-0.425147	0	0
WNT4	0	0	0	0	0.10026	0	0	0	0			0	0	0	0	0	0	0	0	0			0	-0.356863	0	0	0.399527	0	-0.243402	0	0
WNT5B	0	0	0	0	0	0	0	0	0			0	0	0	0	0	0	0	0	0			-0.132805	0.135722	0	-0.276497	0	0	0	0	-0.234589
WNT6	0	0	0	0	0	0	0	0	0			0	0	0	0	0	0	0	0	0			0	0.0986356	0	0.19576	0	-0.323897	-0.367141	0	0
WNT7B	0	0	0	0	0	0	0	0	0			0	0	0	0	0	0	0	0	0			0	-0.121686	0	0	0	0	0	0	0.353721
WNT8B	0	0	0	0	0.0514067	0	0	0.0504084	0			0	0	0	0	0	0	0	0	0			0	0.0573518	0	0	0	0	0	0.140922	-0.411303
WRN	0	0	0	0	0	0	0	0	0			0	0	0	0	0	0	0	0	0			-0.166355	-0.339559	0	0	0	0	0	0	0
WSB1	0	0	0	0	0	0	0	0	0			0	0	0	0	0	0	0	0	0			0	0	0	0	0	0	0	0	0
WT1	0	0	0	0	0	0	0	0	0			0	0	0	0	0	0	0	0	0			-0.265074	0	0	0	0	0	0	0	0
WWOX	0	0	0	0	0	0	0	0	0			0	0	0	0	0	0	0	0	0			-0.315617	-0.126452	0	0	0	-0.150803	0	0	0
WWTR1	0.0508721	0	0	0.0716175	0	0.071986	0.068249	0	0			0	0	0	0	0	0	0	0	0			0	-0.161721	0	0.178849	0	0.169957	0.181955	0	0
XBP1	0.0500009	0	0	0	0	0	0	0	0			0	0	0	0	0	0	0	0	0			0.182317	-0.25057	0	0	0	0	-0.244756	0	0
XIAP	0	0	0	0	0	0.0710769	0.103499	0	0			0.0644207	0	0	0	0.0630809	0.0851252	0.140034	0	0			0	-0.0859848	0	0	0	0.200824	0.208118	0	-0.184343
XKR3	0	0	0	0	0	0	0	0	0			0	0	0	0	0	0	0	0	0			0.359855	0.372356	-0.240814	0	0	0	0	0	0
XPA	0	0	0	0	0	0	0	0	0			0	0	0	0	0	0	0	0	0			0.765279	0	0	0	0	0	0	0	0
XPC	0	0	0	0	0	0	0	0	0			0	0	0	0	0	0	0	0	0			0	-0.119014	0	0.637304	0	-0.148924	-0.447204	0	0
YAP1	0	0	0	0	0	0	0	0	0			0	0	0	0	0	0	0	0	0			-0.159479	0.193392	0	-0.228454	0	-0.208099	0	0	0
YPEL5	0	0	0	0	0	0	0	0	0			0	0	0	0	0	0	0	0	0			0.212466	0	0	0	0	0	-0.343523	0	0
YTHDF2	0.0544304	0	0	0	0	0	0	0	0			0	0	0	0	0	0	0	0	0			0.175298	-0.127387	0	-0.198842	0	0	0	0	0
YY1AP1	0	0	0	0	0.0616376	0	0	0	0			0	0.0513906	0.0515996	0	0.107451	0	0	0.052164	0.0735443			0	0	0	0	0.256078	-0.143448	-0.204897	0	0.191994
ZFP64	0	0	0	0.103453	0	0	0	0	0			0	0	0.0642014	0.153734	0	0	0	0.0548615	0			0	-0.156107	0	0.241012	0	0	0	0	0
ZFPM2	0	0	0	0	0.0673423	0	0.153321	0	0			0	0	0.0518168	0	0.0798806	0	0.385971	0.0513582	0			0	-0.0708849	0	0	0	0	0.444242	0	-0.179565
ZFYVE19	0	0	0	0	0	0	0.180649	0.0589977	0			0	0	0.0587208	0	0	0	0.322314	0.0660059	0			-0.164802	-0.107531	0	0	0	0	0.361997	0	0
ZMIZ1	0	0	0	0	0	0	0	0	0			0	0	0	0	0	0	0	0	0			0.191687	0	-0.184595	0	0	0	-0.307652	0	0
ZMYM2	0	0	0	0	0	0	0	0	0			0	0	0	0	0	0	0	0	0			0	0	0	0	0	0	-0.401694	0	0
ZMYM3	0	0	0	0.0658961	0.0705712	0	0	0	0			0	0	0	0	0	0	0	0	0			0	0	0	0.175489	0.297799	0	-0.270513	0	0
ZMYND11	0	0	0	0	0	0	0	0	0			0	0	0	0	0	0	0	0	0			0	0	0	0	0	0	-0.371713	0	0
ZNF207	0	0	0	0	0.0829298	0	0.108352	0.0790205	0			0	0.0518935	0.0505374	0	0.100783	0	0.174744	0.0923456	0			0	0	0	0	0	0	0.286056	0.18801	0
ZNF217	0	0	0	0	0	0	0	0	0			0	0	0	0	0	0	0	0	0			0	-0.0792076	0	0	0	0	0	0	0
ZNF24	0	0	0	0	0	0	0	0	0			0	0	0	0	0	0	0	0	0			0	0	0	0	0	-0.170954	-0.503675	0	0
ZNF444	0	0	0	0	0	0	0.137944	0.0562936	0			0	0	0.0578874	0	0.0582872	0.056059	0.346438	0.0665252	0			0	0	0	0	0	0	0.436415	0	0
ZNF521	0	0	0	0	0	0	0.0713957	0	0			0	0	0	0.057285	0	0	0.106758	0	0			-0.240435	0	0	0	0	0	0.21138	0	0
ZNF687	0	0	0	0	0	0	0	0	0			0	0	0	0	0	0	0	0	0			0	-0.125588	0	0	0	0	0	0	0
ZNF703	0	0	0	0	0	0	0	0	0			0	0	0	0	0	0	0	0	0			0	0	0	-0.199553	0	0	0	0	0
ZRSR2	0	0	0	0	0	0	0	0	0			0	0	0	0	0	0	0	0	0			-0.213106	-0.181565	0	0.15603	0	0	-0.19733	0	0

## Sheet: Estimation for joint model
	B1											B2											B3
	BLCA	BRCA	GBM	HNSC	LAML	LUAD	LUSC	OV	PAAD			BLCA	BRCA	GBM	HNSC	LAML	LUAD	LUSC	OV	PAAD			BLCA	BRCA	GBM	HNSC	LAML	LUAD	LUSC	OV	PAAD
ABI1	0	0	0	0	0	0	0	0	0			0	0	0	0	0.238	0	0	0	0			0	0	0	0	0	0	0	-0.074	0
ABL2	0	0	0	0	0	0	0	0	0			0	0	0	0	0	0	0	0	0			0	0	0	0	0	0	0	0	0
ABLIM1	0	0	0	0.013	0	0	0	0	0			0	0	0	0.275	0	0.001	0	0	0			0	0	0	0	0	0	0	0	0
ACACA	0	0	0	0	0	0	0	0	0			0	0	0.043	0	0	0	0	0	-0.159			0	0	0	0	0	0	0	0	0
ACSBG1	0	0	0	0	0	0	0.011	0	0			0	0	0	0	0	0	0	0	0			0	0	0	0	0	0	0	0	0
ACSL6	0	0	0	0	0	0	0	0	0			0	-0.223	0	0.137	0	0	0	0	0			0	0	0	0	0	0	0	0	0
ACVR1B	0	0	0	0	0	0	0	0	0			0	0	0	-0.127	0	0	0	-0.072	-0.122			0	0	0	0	0	0	0	0	0
ACVR1C	0	0	0	0	0	-0.024	0	0	0			0	0.087	0	0	0	-0.163	-0.177	0	0			0	0	0	0	0	-0.643	0	0	0
ACVR2A	0	0	0	0	0	0	0	0	0			0	0.114	0	0.058	0	0	0.131	0	0			0	0	0	0	0	0	0	0	0
ADD3	0	0	0	0	0	0	0	0	0			0	0	0	0	0	0	0	0	0			0	0	0	0	0	0	0	0	0
ADM	0	0	0	0	0	0	0	0	0			0	0	0	0	0	0	-0.141	-0.112	0.127			0	0	0	0	0	0	0	0	0
AFF3	0	0	0	0	0	0.008	0	0	0			0	0	0	0.207	0	0.078	0	0	0			0	0	0	0	0	0	0	0	0
AFF4	0	0	-0.05	0	0	0	0	0	0			0	0	-0.285	0	0	0	0	0	0			0	0	0	0	0	0	0	0	0
AGR3	0	0	0	0	0	0	0	0	0			0	0	-0.085	0	0	0	-0.219	0	0			0	0	0	0	0	0	0	0	0
AHI1	0	0	0	0	0	0	0	0	0			0	0	0	0	0	-0.254	-0.254	0	0			0	-0.372	0	0	0	0	0	0	0
AHR	0	0	0.014	0	0.071	0	0	-0.021	0			0	0	0.144	0.124	0.153	0	0	-0.176	0			0.158	0	0	0	0	0	0	-0.097	0
AIP	0	0	0	-0.031	0	0	0	0	0			-0.081	0	0	-0.121	-0.046	0	-0.112	0	0			0	0	-0.378	0	0	0	0	0	0
AK2	0	0	0	0	0	-0.018	0	0	0			0	0.057	0	0	0	-0.093	0	-0.072	0			0	0	0	0	0	0	0	0	0
AK5	-0.01	0	0	0.016	0	0	-0.035	0	0			-0.108	0	0	0	0	0	0	0	0			0	0.047	0	0	0	0	0	0	0
AKAP6	0	0	0	0	0	0	0	0	0			0	0	0	0.133	0	0.058	-0.023	0	0			0	0	0	0	0	0	0	0	0
AKT1	0	0	0	0	0	0	-0.005	0	0			0	0	0	0	-0.185	0	0	0	0			0	0	0	0	0	-0.243	0	0	0
AKT2	0.019	0.001	0	0	0	0.03	0.003	0	0			0.096	0.116	0	0	0	0.132	0	-0.074	0			0	0	0	0	0	0.268	0.1	0	0
AKT3	0	0	-0.001	0	0	0	0	0	0			0.075	0	-0.213	0	0.135	-0.102	0	0	0			0	0	0	0	0	0	0	0	0
ALDH1A1	0	0	0	0	0	0	0	0	0			0	0	0	0	0	0	0	0	0			0	0	0	0	0	0	0	0	0
ALDH2	0	0	0	0	0	0	0	0	0			0	0	0	0.065	0	0	0	0.028	0			0	0	0	0	0	0	0	0.106	0
ALDOC	0	0	0	0	0	0	0	0	0			0	-0.174	0	0	0	0	0	0	-0.09			0	-0.107	0	0	0	0	0	0	0
ALK	0	0	0	0	0	0	0	0	0			0	0	0	0	0	0	0	0	0			0	0	0	0	0	0	0	0	0
AMH	0	0	0	0	0	0	0	0	0			0	0	0	0	0.113	0	0	0	0			0	0	0	0	0	0	0	0	0
ANGPT1	0	0	0	0	0	0	0	0	0			-0.07	0	0	0	0	0	0	0	0			0	0	0	0	0	0	-0.038	0	0
ANKRD28	0	0	0	0	0	0.027	0	0	0			0	0	0	0	0	0.215	-0.07	0	0.089			0	0	0	0	0	0	0	0	0
ANLN	0	0	0	0	0	0	0	0	0			0	0	0	-0.027	0	0	0.14	0	0			0	0	0	0	0	0	0	0	0.23
APC	0	0	0	0	0	-0.012	0	0	0			0	0	0	0	0	-0.14	0	0	0			0	0	0	0	0	-0.136	0.14	0	0
APH1A	0.003	0	0	0	0	0	0	0	0			0.242	0.15	0.108	0.106	0.26	0	0.145	0.095	0.238			0	0	0	0	0	0	0	0	0
APOD	0	0	0	0	0	0	0	0	0			0	0	0	-0.024	0	-0.023	0	0	0			-0.141	0	0	0	0	0	0	0	0
ARAF	0	0	0.03	0	0	0	0	0	0			0	0	0	0	0	-0.113	0	0	0			0	0	0	0	0	0	0	0	0
ARHGAP20	0	0	0	0	0	0	-0.005	-0.039	0			0	0	0	0	0	0	0	-0.194	0			0	0	0	0	0	0	0	-0.472	0
ARHGAP26	-0.066	0	0	0	0	0	-0.029	0	0			-0.201	0	0	0.176	0	0	-0.044	0	0			-0.386	0	0	0	0	0	-0.371	0	0
ARHGEF7	0	0	0	0	0	-0.018	0	0	0			0	0	0	0	0	-0.165	0	0.038	0			0	0	0	0	0	0	0	0	0
ARID1A	0	0	0	0	0	0	0	0.04	0.07			0	0	0	0	0	0	0	0.147	0			0	0	0	0	0	0	0	0	0.37
ARID2	0	0	0	0	0	0	0	0	0			0	0	0	0	0	0	0	0	0			0	0	0	0	0	-0.078	0	0	0
ARIH2	0.02	0	0	0	0	0	-0.001	0	-0.004			0.288	0	0	0	0	0	0	0	-0.221			0	0	0	0	0	0	0	0	0
ARNT	0.035	0	0	0	0	0	0	0	0			0.1	0	0	0	0.182	0	0	0	0			0	0	0	0	0	0	0	0	0
ARRDC4	0	0	0	0	0	0	0	0	0			0	0	0	0	0	0	-0.187	0	0			0	0	0	0	0	0	0	0	0
AR	0	0	0	0	0	-0.003	0	-0.045	0			0	0	0.106	0	0	0	0	-0.188	0			0	0	0	0	0	0	0	0	0
ASMTL	0	0	0	0	0	0	0	0	0			0	-0.084	0	-0.128	0	0	0	-0.28	0			0	0	-0.675	0	0	0	0	0	0
ASXL1	0	0	0	0	0	0	0	0	0			0	0	0	0	0	-0.063	0	0	0			0	0	0	0	0	0	0	0	0
ATF1	0	0	0.005	-0.052	0	0	0	0	0			0	0	0	-0.16	0	0	-0.111	0	0			0	0	0	-0.419	0	0	0	0	0
ATF3	0	0	0	0.037	0	0	0	-0.001	0			0	0	0	0	0	0	0	-0.048	0			0	0	0	0	0	0	0	0	0
ATG5	0	0	-0.002	0	0	0	0	0	0			-0.091	0	-0.088	0	0	0	0	-0.03	0			0	0	0	0	0	0	0	0	0
ATIC	0	0	0.042	0	0	0	0	0	-0.014			0	0.339	0.041	0	0	0.032	0.139	0	-0.191			0	0	0	0	0	0	0	0	0
ATL1	0	0	-0.042	0	0	0	-0.003	0.041	0			0	0	-0.185	0	0	0	0	0.261	0			0	0	-0.533	0	0	0	0	0	0
ATM	0	0	0	0	0	0	0.031	0	0			0	0	0	0	0	0	0.034	0	0			0	0	0	0	0	0	0.128	0	0
ATP1B4	0	0	0	0	0	0	0	0.006	0.004			0.042	0	0	0	0	0	-0.155	0	0.233			0	0	0	0	0	0	0	0.08	0
ATP8A2	0	0	0.047	0	0	0	0	0	0			0	0	0	0	0	0	0	0	0			0	0	0	0	0	0	0	0	0
ATRNL1	0	0	0	0	0	0	0	-0.002	0			0	0	0	0	-0.042	0	0	-0.032	-0.188			0	0	0	0	0	0	0	0	0
ATR	0	0	0	0.037	0	0	0.004	0	0.018			0	0	0	0.144	0	0	0	0.003	0.063			0	0	0	0	0	0	0	0	0
AURKA	0	0	0	0	0	0	0	0	0			0	0	0	0	0	0	0	0	0			0	0	0	0	0	0	0.112	0	0
AURKB	0	0	0	0	0	0	0.068	0	0.048			-0.104	0	0	0	0	0	0.154	0	0			0	0	0	0	0	0	0	0	0
AUTS2	0	0	0	0	0	0.025	0	0	-0.035			0	0	0	0	0	0.058	0	0	0			0	0	0	0	0	0	0	0	0
AXIN1	0	0.015	0	0.007	0	0	0	0.006	0			0	0	0	0	0	0	0.069	0.13	0			0	0	0	0	0	0	0	0	0
AXL	0	0	0	0	0	0	0	0	0			0.146	0	0	0	0	-0.045	0	0	0			0	0	0	0	0	-0.335	0	0	0
BACH1	0	0	0	0	0.016	0	0	0	-0.02			0	0	0	0	0.15	0	0	0	-0.027			0	0	0	0	0	0	0	0	0
BACH2	0	0	0	0	0	0	0	0	0			-0.048	0	0	-0.1	0	0	-0.187	0	0			0	0	0	0	0	0	0	0	0
BAP1	0	0	0	-0.017	0	0	0	0	0			-0.12	0	0	-0.135	-0.056	0	0	0	0			0	0	0	0	0	0	0	0	0
BARD1	0	0	0	0	0	0	0	0	0			0	0	0	0	0	0	0	0	0			0	0	0	0	0	0	0	0	0
DDX39B	0	0	-0.029	0	0	0	0	0	0			0	0	-0.227	0	0	-0.146	0	0	-0.1			0	0	0	0	0	0	0	0	0
BAX	0	0	0	0	0	0	0	0	0			0	0	0	0	0	0	0	-0.142	0			0	0	0	0	0	0	0	0	0
BAZ2A	0	0	0	0	0	0	0	0	0			-0.098	0	0	0	0	0.106	0	0	0.074			0	0	0	0	0	0	0	0	0
BCAS3	0	0	0	0	0	0	0	0	0			0.065	0	0	0	0	0.134	0	0	0			0.095	0	0	0	0	0	0	0	0
BCL10	0.014	0	0	0	0	-0.005	0	0	0			0.098	0	0	0	0	0	0	0	0.035			0	0	0	0	0	0	0	0	0
BCL11B	-0.004	0	0	0	0	0	0	0	0			-0.09	0	0	0	0	0	-0.036	-0.227	0			0	0	0	0	0	0	0	0	0
BCL2A1	0	0	0	0	0	0	0	-0.032	0			0	0	0	0	0	0	0	0	0			0	0	0	0	0	0	0	0	0
BCL2L1	0	0	0	0	-0.012	0	0	0	0			0	0	0	0	0	0	0	0	0			0	0	0	0	0	0	0	0	0
BCL2L2	0	0	0	0	0	0	0	0	0			0	0	0	0	0.175	0	0	0	0			0	0	-0.131	0	0	0	0	0	0
BCL2	0	0	0.002	0	0	0	0	-0.032	0			0	0	0	0	0	0	0	0	0			0	0	0	0	0	0	0	0	0
BCL7A	0	0	0	0	0	0	0	0	0			0.081	0	0	0	0.048	0	0.125	0.12	0			0	0	0	0	0	0	0	0	0
BCL9	0	0	0	0	0	0	0	0	0			0	0	0	0	0	0	0.08	0	0			0	0	0	0	0	0	0	0	0
BCORL1	0	0	0	0	0	-0.01	0	0	-0.02			0	0	0	0	-0.051	-0.14	0	0.203	-0.095			0	0	0	0	0	0	-0.199	0	0
BCR	0	0	0	0	-0.053	0	-0.017	0	0			-0.131	0	0	0	-0.3	0	-0.253	0	0			0	0	0	0	-0.194	0	0	0	0
BHLHE22	0	0	0	0	0	0	0	0	0			0	0	0	0	0	0	0	0	0			0	0	0	0	0	0	0	0	0
BICC1	0	0	0	0	0	0	0	0	0			0	0	0	0	0	0	0	0.105	0			0	0	0	0	0	-0.061	0	0	0
BIN1	0	0	0	0	0	0	0	0	0			0	0	0	0	0.032	0	0.183	0	0			0	0	0	0	0	0	0	0	0
BIRC3	0	0	0	0	0	0	0	0	0			0	0	0	0	0	0	0	0	0			0	0	0	0	0	0	0	0	0
BIRC6	0	0	0	0	0	0	0	0	0			0	0	-0.044	0	0	0	0	0	0			0	0	0	0	0	0	0	0	0
BLM	0	0	0.041	0.053	-0.03	0	0	0	0			0	0	0.163	0	-0.102	0	0	0	0			0	0	0	0	0	0	0	0	0
BMP4	0	0	0	0	0	0	0	0	0			0	0	0	0	0	0	0	0	0			0	0	0	0	0	0	0	0	-0.073
BRAF	0	0	0	0	-0.05	0	0	-0.012	0			0	0	0	0	-0.181	0	0	0	0			0	0	0	0	-0.314	0	0	0	0
BRCA1	0	0	0.036	0	0	0.016	0	0	0			0.054	0	0	0	0	0	0	0	0			0	0	0	0	0	0	0	0	0
BRCA2	0	0	0	0	0	0.008	0	0	0			0	-0.022	0	0	0	0	0.171	0	0			0	0	0	0	0	0	0	0	0
BRIP1	0	0	0	0	0	-0.016	-0.018	-0.003	0			0	0	0	-0.122	0	0	-0.23	0	0			0	0	0	0	0	0	-0.108	0	0
BRSK1	0	-0.004	0	0	0	0	0	-0.022	0			0	-0.046	0	-0.003	-0.153	-0.148	-0.062	-0.079	0			0	0	0	0	0	0	0	0	0
BRWD3	0	0	0	0	0	0	0	0	0			0.14	0	0	0	0	0	-0.101	0	0			0	0	0	0	0	0	0	0	0
BTG1	0	0	0	0	0	0	0	0	0			0	0	0	0	0	0	0	0	0.037			0	0	0	0	0	0	0	0	0
BTG2	0	0	0	0	0	0	0	-0.019	0			0.099	0	0	0	0	0	0	-0.131	0			0	0	0	0	0	0	0	0	0
BTK	0	0	0	0	0	0	-0.032	0	0			0	-0.067	0	-0.06	0	0	-0.156	-0.231	0			0	0	0	0	0	0	0	-0.341	0
BTLA	0	0	0	0	0	0	0	0	0			0	0	0.001	0.092	0.075	0.003	0.09	0.154	0.004			0	0	0	0	0	0	0	0.227	0
BUB1B	0	0	0	0	0	0	0	0	0			0	0	0.131	0	0	0.063	0	0	0			0	0	0	0	0	0	0	0	0
C11orf1	0	0	0	0	0	0	0	0	0			0	0	0	0	0	0	0	0	0			0	0	0	0	0	0	0	0	0
HMGN2P46	0	0	0	0	0	0	0	-0.009	0			0	0	0	0	0	0.092	0.097	0	0			0	0	0	0	0	0	0	0	0
NUTM1	0.014	0	0	0	0	0	0	0	0			0.034	0	0	0	0	0	0	-0.063	0			0	0	0	0	0	0	0	0	0
RMI2	0	0	0	0.006	0	0	0	0.029	0			0.129	0	0	0.067	0	0	0	0.172	0.066			0	0	0	0	0	0	0	0	0
GID4	0	0	0	0	0	0	-0.013	0	0			0	0	0	0.077	0	0	0	0.03	0.176			0	0	0	0	0	0.092	0	0	0
METTL18	0	-0.006	0	0	0	0	0	0	0			0	-0.097	-0.1	0	0	0	0	0	0			0	0	0	0	0	0	0	0	0
TMEM230	0	0	0	0	0	0	0	-0.008	0			0	0	0	0	0	0	0.259	0	0			0	0	0.105	0	0	0	0	0	0
C2CD2L	0	0	0	0	-0.015	0.001	0	0	0			0	0.001	0	0	-0.235	0	0	0.073	0			0	0	0	0	0	0	0	0	0
MB21D2	-0.004	0	0	0	0	0	0.011	0.018	0			-0.082	0	0	0	0	0	0	0.053	0			0	0	0	0	-0.457	0	0	0	0
CEP85L	0	0	0	0	0	0	0	0.003	0			0	0	-0.049	0	0	0	-0.139	0	0			0	0	0	0	0	0	-0.208	0	0
CACNA1F	0	0	0	0	0	0	0	0	0			-0.024	0	0	0	-0.084	0	0	0	0.168			-0.233	0	0	0	0	0	0	0	0.196
CAD	0	0	0	0	0	0	0	0	0			0	0	0	0	0	0	-0.091	0	-0.073			0	0	0	0	0	0	0	0	0
CALR	0	0	0	0	0	0	0	0	0			0	0.063	0	0	0	0	0	0	0			0	0	-0.474	0	0	0	0	0	0
CAMK2B	0	0	0	0	0	0.011	0	0	0			0.077	0	0	0	0.162	0.042	0	0	0			0	0	0	0	0	0	0	0	0
CAMK2G	0	0	0	0	0	0	0	0	0			0	-0.039	0	0	0	0	0	0	0			0	0	0.17	0	0	0	0	0	0
CAPRIN1	0.003	0	0	0	0.025	0.004	0	0	0.002			0	0	0	0	0	0	0	0	0			0.064	0	0	0	0	0	0	0	0
CARS	0	0	0	0	0	-0.022	0	0	0			-0.126	0	0	0	-0.021	0	0	0	0			0	0	0	0	0	0	0	0	0
CASC5	0	0	0	0	0	0	0	0	0			0	0	0	0	0	0	0	0	0			0	0	0	0	0	0	0.407	0	0
CASP3	0	0	0	0	0	0	0	0	0			0	0	0	0	0	0	0	0	0			0	0	0	0	0	0	0	0	0
CASP7	0	0	0	0	0	0	0	0	0			0	0	0	0	0	0	0	0	0.103			0	0	0	0	0	0	0	0	0
CAV1	0	0	0	0	0	0	0	0	0			0	0	0	0	0	0	0	0	0			0	0	0	0	0	0	0	0	0
CBFA2T3	0	0	0	0	-0.019	0	0	0	0.013			0	0	0	0	0	0	0	0	0			-0.134	0	0	0	0	0	0	0	0
CBFB	-0.01	0	0	0	0	0	0	0	0			0	0	0	0	0	0	0.074	0	0.141			0	0	0	0	0	0	0	0	0
CBLB	0	0	0	0.01	0	0	0.081	0	-0.002			-0.107	-0.098	0	0	0	0	0.104	-0.113	-0.037			0	0	0	0	0	0	0.34	0	0
CBLC	-0.03	0	-0.026	0.012	0	0	0	-0.012	0			-0.063	0	0	0	-0.143	0	0	0	0			0	0	0	0	0	0	0	0	0
CBL	0.003	0	0	0	0	0	-0.001	0	0			0.08	0	0	0	0	0	0	0	0			0	0	0	0	0	0	0	0	0
CCDC28A	0	0	0	0	0	0	0	0	0			0	0	0	0	0	0	0	0	0			0	0	0	0	0	0	0	0	0
CCDC6	0	0	0	0	0	0	0	0	0			0	0	0	0	0	0.003	0	0	0			0	0	0	-0.839	0	0	0	0	0
CCDC88C	0	0	0	0	0	0	-0.019	0	0			0	0	0	0	0	0	0	0	0			0	0	0	0	0	0	0	0	0
CCK	0	0	0	0	0.014	0	0	0	0			0.138	0	0	0	0	0	0.054	0	0			0	0	0	0	0	0	0	0	0
CCL2	0	0	0	0	0	0	0	0	0.028			0	0	0	0	0	0	0	0	0.037			0	0	0	0	0	0	0	0	0
CCNA2	0	0	0	0	0	0	0	0	0			0	0	0	0	0	0.097	0	0	0			0	0	0	0	0	0	0	-0.119	0
CCNB1IP1	0	0	0	0	0	0	0	0	-0.004			0	0	0	0	0	0	0	0	-0.083			0	0	0	0	0	0	0	0	0
CCNB3	0	0	-0.011	0	0.035	0	0	0	0			0	0	0	0	0.039	0	0	0	0			0	0	0	-0.091	0	0	0	-0.177	0
CCND2	-0.004	-0.018	0	0	-0.007	0	0	0	0			-0.274	-0.156	0	0	0	0	0	0	0			-0.52	0	0	-0.09	0	0	-0.139	0	0
CCND3	0	0	0.041	0	0	0	0	0	0			0	0	0.068	0.034	0.376	0	0	0	0			0	0	0	0	0	0	0	0	0
CCNE1	0	0	0	0	0	0	0.044	0	0			0	0	0	0	0	0	0.253	0	0			0	0	0	0	0	0	0	0	0
CCNG1	0	0	0	0	0	0	0	-0.027	0			0	0	0.122	0	0	0	0.029	-0.195	0			0	0.103	0	0	0	0	0	-0.698	0
CCT6B	0	0	0	-0.001	0	0	0	0	0			0	0	-0.127	0	0	0	0	0	0			0	0	0	0	0	0	0	0	0
CD19	0	0	0	0	0	0	0	0.013	0			0.035	0	0	0	0	0	0	0	0			0	0	0	0	0	0	0	0	0
CD274	0	0	0	0	0	0	-0.026	0	0			0	0	0	0	0	0	-0.23	0	0			0	0	0	0	0	0	0	0	0
CD28	0	0	0	0	0	0	0	0	0			-0.068	0	0	0	0	0	-0.074	-0.023	-0.125			0	0	0	0	0	0	0	0	0
CD36	-0.01	0	0	0	0	0	0	0	-0.032			0	0	0	0	0	0	0	0	0			0	0	0	0	0	0	0	0	0
CD44	0	0	0	0	-0.001	0	0	0	0			0	0	0	0.026	0	0	0	0	0			0	0	0	0	0	0	0	0	0
CD58	0	0	0	0	-0.087	0	0	0	0			0	0	0.083	0	0	0	0	0.048	0			0	0	0	0	-0.463	0	0	0	0
CD70	0	0	0	0	-0.007	0	0	0	0			0	0	0	-0.215	0	0	0	0	0			0	0	0	0	0	0	0	0	0
CD74	0	0	0	0	0	0	0	0	-0.01			0	0	0	0	0	0	0.117	-0.087	-0.278			0	0	0	0	0	-0.214	0.332	0	0
CD79A	-0.02	0	0	0	0	0	0	0	0			0	0	0	0	0	0	0	0	0			0	0	0	0	0	0	0	0	0
CD79B	0	-0.017	0	0	0	0	0	0	0			0	0	0	0	0	0	-0.095	0	0			0	0	0	0	0	0	0	0	0
CD8A	0	0	0	0	0	0	0	0	0			0.083	0	0	0	0	0	0	0	0			0	0	0	0	0	0	0	-0.117	0
CDC14A	-0.002	0	0	0	0	0	-0.048	0	-0.002			0	-0.213	0	0	0	0	-0.137	0	-0.097			0	0	0	0	0	0	-1.103	0	0
CDC14B	0	0.015	0	0	0	0	0	0	0			0	0	0	0	0.244	0	0	0	0			0	0	0	0	0	0	0	0	0
CDC25A	-0.023	0	0	0	0	-0.008	0	0	0			-0.041	0	0	0	0	0	0.146	0	0			0	-0.092	0	0	0	0	0	0	0
CDC25C	0	0	0	0	0	0	0	0	0			0	0	0	0	0	0	-0.076	0	0			0	0	0	0	0	0	0	0	0
CDC42	0	0.005	0	0	0	0	0	0.066	0			0	0	0	-0.063	0	0	-0.323	0.261	0			0	0	0	0	0	0	0	0	0
CDC73	0	0	0	0	0	0	-0.003	0	0			0	0	0	0	0	0	0	0.037	0			0	0	0	0	0	0	0	0	0
CDH11	0	0	0	0	0	0	0	0	0			0	0	0	0	0	-0.136	0	0	0			0	0	0	0	0	0	0	0	0
CDH1	0	0	0	0	0	0	0	0	-0.004			-0.144	0	0	0	0	0	-0.37	0.064	-0.181			-0.322	0	0	0	0	0	0	0	0
CDK12	0	0	0	0	0	0	0	0	0			0	0	0	0	0	0	0.154	0	0			0	0	0	0	0	0	0	0	0
CDK1	-0.034	0	0	-0.015	0	-0.026	0	0	0.049			0	0	0	0	0	0	0	0	0.074			0	0	0	0	0	0	-0.566	0	0
CDK2	0	0	0	0	-0.011	0	0	0	0.019			0	0	-0.087	0	-0.018	0	0	0	0			0	0	0	0	0	0	0	0	0
CDK5RAP2	0	0	0.017	0	0	0	0	0	0			0	0	0.17	0	0	0	0	0	0			0	0	0	0	0	0	0	0	0
CDK6	0	0	0	0	-0.03	0	0	0	0			0.023	0	0	0	-0.087	0	0	0	0			0	0	0	0	-0.844	0	0	0	-0.775
CDK8	0	0	-0.045	0	-0.042	0	-0.04	0	0			0	0	-0.13	0	-0.175	0	-0.132	0	0			0	0	0	0	-0.143	0	0	0	0
CDK9	0	0	-0.015	0	0	0	0	0	0			0	0	-0.081	0	0	0	-0.153	0	0			0	0	-0.883	0	0	0	0	0	0
CDKL5	0	0	0	0	0	0	0	0	0			-0.043	0	0	0	0	0	0	0	0			0	0	0	0	0	0	0	0	0
CDKN1A	0	0	0	0	0	0	0	0	0			0.002	0	0	0	0	0	0	0	0			0	0	0	0	0	0	0	0	0
CDKN1B	0	0	0	0	0	0	0	0	0			0	0	0	0	0	0	0	0	0			0	0	0	0	0	0	0	0	0
CDKN2A	0	0	0	0	0	0	0	0	0			0	0	0	0	0	0	0	0	0			0	0	0.602	0	0	0	0	0	0
CDKN2B	0	0	0	0	0	0	0	0	0			0	0	0	0	0	0	0	0	0			0	-0.065	0	0	0	0	0	0	0
CDKN2D	-0.016	-0.001	0	0	-0.024	0	0	0	0			-0.107	-0.048	0	-0.156	-0.18	-0.104	-0.079	-0.002	0			0	0	0	0	0	-0.126	0	0	0
CDX1	0	0	0	0	0	0	0	0	0			0	0	0	0	0	-0.11	-0.092	0	0			0.081	0	0	0	0	0	0	0	0
CDX2	0	0	0	0	-0.002	0	0	0	0			0	0	0	0	-0.232	0	0	0	0			0	0	0	0	0	0	0	0	0
CEBPA	0	0	0	0	0	0	0	0	0			0	-0.058	0	0	0	0	0	0	0			0	0	0	0	0	0.072	0	0	0
CEBPB	0	0	0	0	0	0	0	0	0			-0.151	-0.03	0	0	0	-0.132	0	0	0			0	0	0	0	0	0	0	0	0
CEBPD	0	-0.012	0	0.036	0	0	0	0	0			0	0	0	0.132	0	-0.138	0	-0.055	-0.122			0	0	0	0	0	0	0	0	0
CEBPE	0	0	0	0	0	0	-0.032	0	0			0	0	0	0	0	0	-0.145	-0.08	0			0	0	0	0	0	0	0	0	0
CNTRL	0	0	0	0	-0.002	0	0	0	0			0	0	0	0	0	0	0	0	0			0	0	0	0	0	0	0	0	0
CEP57	0	0	0	0	-0.062	-0.018	0	0	0			0	0	0	0	-0.1	0	0	0.025	0			0	0	0	0	0	0	0	0	0
CHCHD7	0	0	0	0	0	0	0	0	0			0.029	0	0	0	0	0.092	0	0	0			-0.178	0	0	0	0	0	0	0	0
CHEK1	0	0	0	0	-0.012	0	0	0	0			0	0	0	0	0	0	0	0	0			0	0	0	0	0	0	0	0	0
CHEK2	0	0	0	0	0	0	0	0	0			0	0	0	0	0	0	0	0	0			0	0	0	0	0	0	0	0	0
CHIC2	0.002	0	0	0.016	0.077	0	0.001	0.001	0			0	0.005	0	0.051	0.221	0	0	0.116	0			0	0	0	0	0	0	0	0.327	0
CHL1	0	0	0	0	0	0	-0.003	0	0			0	0	0	0	0	0	0	0	0			0	0	0	0	0	0	0	0	0
CHST11	0	0	0	0	-0.031	0	0	0	0			0	0	0	0	0	0	0	0	0			0	0	0	0	0	0	0	0	0
CHUK	0	0	0	0	0	0	0.053	0	0			0	0	0	0	-0.096	0	0.1	-0.208	0			0	0	0	0	0	0	0	0	0
CIC	0	0.043	-0.042	0	-0.012	0	0	0	0			0	0.071	0	0	0	0	0	0	0			0	0	0.128	0	0	0	0.178	0	0
CIITA	0	0	0.015	0	-0.021	0	-0.036	0.004	0			0	0	0	0	-0.102	0	-0.294	0	0			0	0	0	0	0	0	-0.558	0.365	0
CIRH1A	0	0	0	0	0	0	0	0	0			0	-0.097	-0.135	0	0	0	0	0	0			0	0	0	0	0	0	0	0	0
CIT	0	0	0	0	0	0	0	0	0			0	0	0	0	0	0	0	0	-0.115			0	0	0	0	0	0	0	0	0
CKB	0	0	0	0	0	0	0	0	0			0.049	0	0	0	0	0	0	0.274	0			0	0	0	0	0	0	0	0	0
CLP1	0	0	0	0	0.007	0	0	0	0			0	0.113	0	0	0.159	0.079	0	0.004	0.026			0	0	0	0	0.432	0	0	0	0.352
CLTCL1	0	0	0	0	0	0	0	0	0			0	0	0	0	0	0	0	0	0			0	0	0	0	0	0	0	0	0
CMKLR1	0	0.017	0	0	0	0.008	0	0	0			0	0.104	0	0	0	0	0	0	0			0	0.12	0	0	0	0	0	0	0
CNTN1	0	0	0	-0.002	0	0	0	0	0			0	0	0	-0.046	0.127	0.198	0	0	0			0	0	0	0	0	0	0	0	0
COG5	0	0	0	0	0	0	0	0	0			0	0	0	0	0	0	0	0	-0.077			0	0	0	0	0	0	0	0	0
COL11A1	0	0	0	0	0	0	0	0	0			0	0	0	0	0	0	0	0	0			0	0	0	0	0	0	0	0	0
COL1A2	0	0	0	0	0.017	0	0	0	0.084			0	0.161	0	0	0.061	0	0	0	0			0	0.262	0	0	0	-0.158	0	0	0
COL3A1	0	0	0	0	0	0	-0.127	-0.029	0			0	0	0	0	0	-0.035	-0.354	0	0			0	0	0	0	0	-0.02	-0.516	0	0
COL6A3	0	0	0	0	0	0	0	0	0			0	0	0	0	0	0	0	0	0			0	0	-0.242	0	-0.067	0	0	0	0
COL9A3	0	0	0	0	0	0	0	0	0			0	0	0	0	0	0	0	0	0			0	0	0	0	0	0	0	0	0
COMMD1	0	0	0.075	0	0	0.059	0	-0.016	0			0	0	0.042	0	0.19	0	0	0	0			0	0	0	0	0	0.117	0	0	0
COX6C	0.01	0	0	0	-0.023	0	0	0	0			0.072	0	0	0	-0.058	0	0.08	0	0			0	0	-0.166	0	0	0	0.18	0	0
CPNE1	0	0	0	0	0	0	0	0	0			0	0	0	0	0	0	0	0	0			0	0	0	0	0	0	0	0	0
CPSF6	0	0	0	0	0.027	0	0	0	0			0	0	0	0.111	0.064	0	0	0	0			0	0	0	0	0	0	0	0	0
CRADD	0	0	0	0	0	0	0	0	0			0	-0.079	0	0	0	0	-0.113	0	0.051			0	-0.354	0	0.03	0	0	0	0	0.114
CRKL	0	0	0.054	0.115	-0.099	-0.018	0	0	0			0	0	0	0.089	-0.143	0	0	0	0			0	0	0	0	-0.249	0	0	0	0
CRLF2	0	0	-0.004	0	0.044	0	0	-0.06	0			0	0	0	0	0.04	0	0	-0.359	0			0	0	0	0	0	0	0	-0.423	0
CRTC3	0	0	0	-0.021	0	0	0	0	0			0	0	0	-0.158	0	0	0	0	0			0	0	0	-0.309	0	0	0	0	0
CSF1R	0	0	0	0	0	0	0	0	0			-0.194	0.097	0	0	0	0	0	0	0			0	0	0	0	0	0	0	0	0
CSF1	0	0	0	0	0	0	0	0	0			0	0	0	0	-0.107	0	0.28	0	0			0	0	0	0	0	0	0	0	0
CSF3R	0	0	0	0	-0.144	0	0	0	0			0	0	0	0	0	0	0	0	0			0	0	0	0	-0.77	0	0	0	0
CSNK1G2	0.014	0	-0.016	0	0	0	0	0	0			0	0	-0.088	0	0	0	0	0	-0.031			0	0.014	0	0	0	0	0	0	0
CSNK2A1	-0.04	-0.056	-0.021	0	-0.031	-0.045	0	0	0			0	-0.139	0	0	0	0	0	0	0			0	-0.357	0	0	0	0	0	0	0
CTCF	0	0	0	0	0	0	0	0	0			0	0	0	0	0	0	0	0	0			0	0	0	0	0	0	0	0	0
CTNNA1	0	0	0	0	0	0	0	0.055	0.044			0	0	0	0	0	0	0	0.105	0			0	0	0	0	0	0	0	0.195	0
CTNNB1	0	0	0	0	0	0	0	0	0			0	0	0	0	0	0	0	0	0			0	0	0	0	0	0	0	0	0
CTNND2	0	0	0	0	0	0	0	0	0			-0.121	0	-0.185	0	0	0	0	0	0			0	0	0	0	0	0	0	0	0
CTRB1	0	0	0.039	0	0	0	0	0	0			0	0	0	0	0	0	0	0	0			0	0	0	0	0	0	0	0	0
CXCR4	0	0	0	-0.004	0	0	-0.006	0	0			0	0	0	0	0	0	-0.072	0	0			0	0	0	0	-0.156	-0.326	0	0	0
ACKR3	0	0	0	0	0	0	0	0	0			0	0	0	0	0	0	0	0	0			0	0	0	0	0	0	0	0	0
CYP1B1	0	0	-0.023	0.006	0	-0.008	0	0	0			0	0	-0.215	0	0	0	0	0	0			0	0	0	0	0	0	0	0	0
CYP2C19	0	0	0	0	0	0	0	0	0			0	0	0	0	0	0	0	0	0			0	0	0	0	0	0	0	0	0
SPECC1	-0.005	0	0	0	0.006	-0.012	0	0	0			0	0	0	0	0.28	0	0	0	0			0	0	0	0	0	0	0	0	0
DACH1	0	0	0	0	0.008	0	0.012	0	0			0	0	0.114	0	0	0	0.105	0	0.066			0	0	0	0	0	0	0	0	0
DACH2	0	0	0	0	0.007	0	0	0	0			0	0.126	0	0	0.169	0	0	0.036	0			0	0	0	0	0	0	0	0	0
DAXX	0	0	0	0	0	0	0	0	0			0	0	-0.309	-0.091	0	0	0	-0.012	-0.002			0	0	0	-0.191	0	0	0	0	0
DCLK2	0	0	0	0	0	0	0.004	0	0.024			0	0	0	-0.034	-0.029	0	0	0	0			0	0	0	0	0	0	0	0	0
DCN	0	-0.06	0	0	0	0	0.017	0	0			0	-0.157	0	0	0	-0.029	0.155	0	-0.142			0	0	0	0	0	0	0	0	0
DDR2	0	0	0.004	0.003	0	0	0.017	0	0			0	0	0.031	0	0	0	0	0	0			0	0	0	0	0	0	0	0	0
DDX10	0	0	0	0	0	0	0	0	0			0	0	0	0	0	0	0	0	0			0	0	0	0	0	0	0	0	0
DDX5	0	0	0	0	0	-0.011	0	0	0			0	0	0	0	0	-0.023	0	0	0			0	0	0	0	0	0	0	0	0
DDX6	0	0	0	0	0	0	0	0.012	0			-0.056	0	0	0	0	0	0	0	0			-0.247	0	0	0	0	0	0	0	0
DEK	0	0	0	0	0	0	0	0	0			0	0	0	0	0	0	0.16	0	0			0	0	0	0	0	0	0	0	0
DGKB	0.075	0	0	0	0	0	0	0	0			0.219	0.053	0	0	0	0	0	0	0			0.332	0	0	0	0	0	0	0	0
DGKZ	0	0	0	0	0	0	0	0	0			0	0	0	0	0	0	0	0	0			0	0	0	0	0	0	0	0	0
DIRAS3	0.011	0	0	0	0	0	0	0	0			0	0	0	0	0	-0.133	0	-0.135	0			0	0	0	0	0	0	0	0	0
DKK1	0	0	0	0	0	0	0	0	0			0	0	0	0	0	0	0	0	0			0	0	0	0	0	0	0	0	0
DKK2	0	0	0	0	0	0	0	0	0			0	0	0	0.077	0	0	0	0	0			0	0	0	0	0	0	0	0	0
DKK4	-0.028	0	0	0	0	0	0	0	0			-0.188	0	0	0	0	0	0.189	0	0			-0.132	0	0	0	0	0	0	0.282	0
DLEC1	0	0	0	0	0	0	0	0.001	0			0	0	0	0	0	0	0	0.1	0			0	0	0	0	0	0	0.843	0	0
DLL1	0	-0.016	0	0	0	0	-0.021	-0.014	0			0	-0.101	0	0	0	0	-0.166	-0.189	0			0	0	0	0	0	0	0	0	0
DLL3	0	0	0	-0.007	0.006	0	0	-0.007	0			0	0	-0.176	-0.254	0	0	-0.102	0	0			0	0	0	0	0	0	0	-0.394	0
DLL4	0	0	-0.001	0	0	0	0.012	0	0			0	0	0	0	0	0	0	0	0			0	0	0	0	0	0	0	0	0
DMRT1	0.07	0	0	0	0	0	0	0	0			0.094	0	0.056	0	0	0	0	0.083	0			0.091	0	0	0	0	0	0	0	0
DMRTA2	0	0	-0.051	0	0	-0.013	0	0	0.019			0	0	0	0	0	0	0.159	0	0			0	0	-0.371	0	0	0	0	0	0
DNAJB1	0.002	0	0	0	0	0	0.021	0	0			0	-0.062	0	0	-0.097	0	0	-0.086	0			0	0	0	0	0	0	0	0	0
DNM1	0	0	0	0	0	0	0	0	0			0	0.045	0	0	0	0	0	0	0			0	0	-0.068	0	0.282	0.15	0	0	0
DNM2	0	0	0	0	0	0	0	0	0			0	0	0	0	0	0	0	0	0			0	0	0	0	0	0	0	0	0
DNM3	0	0	0	0	-0.044	0	0	0	0			0	0	0	0	0	-0.098	0	0	-0.166			0	0	0	0	0	-0.161	0	0	0
DNMT1	0	0	0	0	0	0	0	0	0			-0.088	0	0	0	0	0	0	0	0			0	0	0	0	0	0	0	0	0
DNMT3A	0	0.001	0	0	0	0	0	0	0			0	0	0	0	0	-0.032	0	0	0			0	0	0	0	0	-0.296	0	0	0
DOCK1	0	0	0	0	0	0	0	0	0			0	-0.068	0	0	0	0	0	-0.147	0.073			0.075	0	0	0	0	0	0	0	0
DOT1L	0.013	0	0	0	0	0	0	0	0			0.1	0	0	0	0	0.131	0	0	0			0	0	0	0	0	0	0	0	0
DPM1	0	0	0.004	0	0	-0.017	0	0.012	0			0	0	0.176	0	0	-0.132	0	0.081	0			0	0	0	0	0	-0.314	0	0	0
DST	0	0	0	0	-0.04	0	0	0	0			0	0	0	0	-0.17	0	0	0	0			0	0	0	0	0	0	0	0	0
DTX1	0	0	0	0	0	0	0	0	0			0	0	0	0	0.009	0	0	0	0			0	0	0	0	0	0	0	0	0
DTX4	-0.1	0	0	0	0	0	0	-0.027	0			0	0	0	0	0	0	0	0	0			0	0	0	0	0	0	0	0	0
DUSP26	0.006	0	0	0	0	0	0	-0.046	0			0	0	0	0	0	0	0	0	0			0	0	0	0	0	0	0	0	0
DUSP2	-0.005	0	0	0.006	0	0	0	0	-0.012			0	0	0	0.058	0	0	0	0	0			0	0	0	0	0	0	0	0	0
DUSP9	-0.003	0	-0.024	0	0	0	-0.001	0	0			-0.1	-0.056	-0.091	-0.088	0	0	-0.075	-0.041	0			0	0	-0.196	0	0	0	0	0	0
E2F1	0	0	0	0	0	0	0.054	0	0			0	0	0	0	0	0	0.07	0	0			0	0	0	0	0	0	0	0	0
EBF1	0	0	0	0	0	0	0	0	0			0	0	0	0	0	0	0	0	0			0	0	0	0	0	0	0.257	0	0
EDNRB	0	0	0	0	0	0	0	0	0			0	0	0	0	0	0	0	0	0			0	0	0	0	0	0	0	0	0
EED	0	0	0	0	0	0	0	0	0			0	0	0.09	0	0	0	0	0	0			0	0	0	0	0	0	0	0	0
EGFR	-0.028	0	0	0	-0.011	0	0	0	0			-0.204	0.062	0	0	-0.075	0	0	0	0			0	0	0	0	0	0	0	0	0
EGF	0	0	0	0	0	0	0	0	0			0	0	0	0	0	0.103	0	0	0			0	0	0	0	0	0	0	0	0
EGR1	0	0	0	-0.012	0	0	0.022	0	0			0	0	0	0	0	0	0	0	0			0	0	0	0	0	0	0	0	0
EGR2	0	0	0	0	0	0	0	0	0			-0.088	0	0	0	0	0	0	0	0			0	0	0	0	0	0	0	0	0
EGR4	0	0	0	0	0	0	0	0	0			0	0	0	0	0	0	0	0	0			0	0	0	0	0	0	0	0	0
EIF4E	0	0	0.005	0	0	0	0	0.044	0			0	0	0	0	0.038	0	0	0.242	0			0	0	0	0	0	0	0	0.515	0
ELF4	0	0	0	0	0	0	0	0	0			0	0	0	0	0	0	0	-0.116	0			0	0	0	0	0	0	0	0	0
ELK4	0	0	0	0	0	0	0	0	0			0	0	0	0	0	0	0	0	0			0	0	0	0	0	0	0	-0.21	0
ELL	0	0	0	0	0.013	0	0	0.025	0.008			0	0	0	0	0	0	0	0	0			0	0	0	0	0.397	0	0	0	0
ELN	0	0	0	0	0	0	0	0	0			0	0	0	0	0	0	-0.102	0	0			0	0	0	0	0	0	0	0	0
ELOVL2	0	0	0	0	0	0	0.056	0	0			0	0	0	0	0	0	0.248	0	0			0	0	0	0	0	0	0	0	0
ELP2	0	0	0	0	0	0	0	-0.013	0			0	0.156	0	0	0	0	0.198	0	0			0	0	0	0	0	0	0	0	0
EML1	0	0	0	0	0	0	0	0	0			0.086	0	0	0	0	0	0	0	0			0	0	0	0	0	0	0	0	0
EML4	0	0	0	0	-0.005	0.003	0	0	0			0	0	0.106	0	-0.038	0	0	0.213	0			0	0	0	0	0	0	0	0	0
ENPP2	0	0	0.02	0	0	0	0	0	0			0	0	0.115	0	0	0	0.126	0	0			0	0	0	0	0	-0.095	0	0	0
EP300	0	0	0	0	0	-0.006	0	0	0			0	0	0	0	0	0	-0.284	0	0			0	0	0	0	0	0	0	0	0
EPC1	0	0	0	0	0	0	0	0	0			0	0	0	0	0	0	0	0	0			0	0	0	0	0	0	0	0	0
EPCAM	0	0	0	0	-0.026	0	0	0	0			0	0	0	0	0	0	0	-0.079	0			0	0	0	0	0	0	0	0	0
EPHA2	0	0	0	0	0	0.013	0	0	0			0	0	0	0	0	0	0	0	0			0	0	0	0	0	0	0	0	0
EPHA3	0	0.006	0	0	-0.052	0	0	0.015	0			0	0	0	0	0	0	0	0.055	0			0	0	0	0	-0.351	0	0	0	0
EPHA7	-0.015	0	0	0	0.005	-0.037	0	0	0			0	0	0	0	0.166	0	0	0	0			0	0	0	0	0	0	-0.352	0.223	0
EPHB1	0	0	0	0	0	0	0	0	0			0	0	0	0	0	0	0	0.21	0			0	0	0	0	0	0.136	0	0.239	0
EPHB6	0	0.017	-0.043	0	0	0	0	0	0			0	0	0	0	0	0	0	0	0			0	0.272	0	0	0	0	0	0	0
EPOR	0	0	0	0	0	0	0	0	0			0	0	0	0	0	0	0	0	0			-0.047	0	0	0	0	0	0	0	0
EPO	0	0	0	0	0	0	0	0	0			-0.068	0	0	0	-0.205	0	0	0	0			0	0	0.081	0	-0.358	0.109	0	0.15	0
EPS15	0	0	0.035	0	0	0	-0.004	0	0.059			0	0	0.128	0	0	0	-0.193	0	0.158			0	0	0	0	0	0	-0.402	-0.141	0.315
ERBB2	0	0	0	0	0	0	0	0	-0.005			0	0	-0.056	-0.185	0	0	0	0	-0.165			0	0	0	0	0	0	0	0	0
ERBB3	0	0.02	0	0	0	0	0	0	-0.02			0	0.082	0	0	0	0	0	0	0			0	0	0	0	0	0	0	0	0
ERBB4	0	0	0	0	0	0	0	0	0			0.084	0	0	0	0	0.108	0	0.036	0			0	0	0	0	0.105	0	0	0	0
ERC1	0	0	0	0	0	-0.001	0	0	-0.022			0	0	0	0	0	-0.088	0.157	0	-0.085			0	0	0	0	0.239	0	0	0	0
ERCC1	0	0	0	0	0	0	0	0	0			0	0	0	0	0	0	-0.149	0	0			0	0	0	0	0	0	0	0	0
ERCC3	0	0	0	0	0	0	0	0	0			0	0	0	0	0	0.107	0	0.035	0			0	0	0	0	0	0.364	0	0	0
ERCC5	0	0	0	0	-0.017	0	0	0	0			0	0	-0.15	0	0	0	0	0	0			0	0	0	0	-0.088	0	0	0	0
ERCC6	0.016	0	0	0	0.007	0	0	0	0			0	0	0	0	0	0	0	0	0			0	0	0	0	0	0	0	0	0
ERG	0	0	0	0	0	0	0	0	0			0	0	0	0	0	0	0	0.035	0			0.145	0	0	0	0	0	0	0	0
ERLIN2	-0.011	0	0	0	0	0	0	0	0			0	0	0	0	0	0	0	0	0			0	0	0	0.02	0	0	0	0	0
ESR1	0	0	0	0	0	0	-0.008	0	0			0	0	0	0	0	0.072	-0.107	0	0			0	0	0	0	-0.105	0.123	-0.542	0	0
ETS1	0	0	0	0.083	-0.013	0	0	0	0			0	0	0.115	0.133	-0.026	0	0	0	0			0	0	0	0	0	0	0	0	0
ETS2	0	0	0	0	0	0	0	0	0.027			0	0	0	0	0	0	0	0	0			0	0	0	0	0	-0.136	0	0	0
ETV1	0	0	0	0	0	0	0	0	0			0	0	0	0	0	0	0	0	0			0	0	0	0	0	0	0	0	0
ETV4	0	0	0	0.019	0	0	0	0	0			0	0	0	0	0	0	0	0	0			0	0	0	0	0	0	0	0	0
ETV5	0	0.02	-0.019	0	0	0	0	0	0			0	0	-0.102	0	-0.031	0	0	0	0			0	0	0.077	0	0	0	0	0	0
ETV6	0.039	0	0.002	0.05	0.064	0	0.024	0	0.048			0.026	0	0	0.118	0.022	0.002	0.082	0	0.027			0	0	0	0	0	0	0	0	0
EWSR1	0	0	0	0	0	0	0	0	0			0	0	0.072	0	0	0	0	0	0			0	0	0	0	0	0	0	0.168	0
EXOSC6	0	0	0	0	0	0	0	0	0			0	0	0	0	0	0	0	0	0			0	0	0	0	0	0	0	0	0
EXT1	0	0	0	0	0	0	0	0	0			0	0	0	0	0	0	0	0	0.04			0	0	0	0	0	0	0.109	0	0
EXT2	0	0.081	0	0	0	0	0	0	0			0	0	0	0	0	0	0.197	-0.162	0			0	0	0	0	0	0	0	0	-0.22
EYA1	0	0	0	0	0	0	0	0	0			0	0	0	0	0	0	0	0	0			0	0	0	0	0	0	0	0	0
EYA2	0	0	0	0.117	0	0	0	0	0			0	0	0	0	0	-0.078	0	0	0			-0.423	0	0	0	0	0	0	0	0
EZH2	0	-0.015	0	0	0	0	0	0	0			0	0	0	0	0	0	0	0	0			0	0	0	0	0	0	0	0	0
FAF1	0	0	0	0	-0.016	-0.01	0.025	0	0			0	0	0	0	-0.082	0	0	0	0			0	0	0	0	0	0	0	0	0
AMER1	0	0	0	0	0	0	0	0	0			0	0	0	0	-0.158	-0.091	0.111	0	0			0	0	0	0	-0.574	-0.168	0	0	0
FAM127C	-0.018	0	0.01	0	0	0	0	0	0			0	0	0	0	0	0	0.117	0	0			0	0	0	0	0	0	0	0	0
FAM19A2	0	0	0	0.005	0	0	0	0.013	0			0	0	0	0.169	0	0	0.107	0.029	0			0	0	0	0	0	0	0	0	0
FAM19A5	0	0	0	0	0	0	0	0	0			0	0	0	0	0	0	-0.007	0	0			0	0	0	0	0	0	0	0	0
NUTM2A	0	0	0	0	0	0	0	0	0			0	0	0	0	0	0	-0.184	0	0			0	0	0	0	0	0	0	0	0
FAM46C	0	0	0	0	0.015	0	0	0	0			0	0	0	0	0	0	0	0	0			0	0	0	0	0	0	0	0	0
FANCC	0	0	0	0	0	0	-0.002	-0.002	0			0	0	0	0	0	0	-0.073	0	0			0	0	0	0	0	0	0	0	0
FANCD2	-0.032	0	0	0.009	0.011	0	-0.017	0	0			0	0	0	0	0	0	-0.117	0	0			-0.111	0.159	0	0	0	0	0	0	0
FANCE	0	0	0	0.03	0	0	0	0.027	0			-0.007	0	0	0	0	0	0	0	0			0	0	0	0	0	0	0	0	0
FANCF	0	0	0	0	0	0	0	0	0			0	0	0	0	0	0	0	0	0			0	0	0	0	0	0	0	0	0
FANCG	0	0	0	0	0	0	0	0	0			0	0	0	0	0	0.037	0	0.098	0			0	0	0.146	0	0	0	0	0	0
FANCI	0	0	0	0	0	0	0	0	0			0	0	0	0	0	0.11	0.11	0	0			0	0	0	0	0	0	0	0	0
FANCL	0	-0.004	0	0	0.077	0	-0.079	0	0			0	0	0	0	0	0	-0.133	0	0			0	0	0	0	0	0	-0.63	0	0
FANCM	0	0	0	0	0	0	0	0	0			0	0	0	0	-0.004	0	0	0	0			0	0	0	0	0	0	0	-0.348	0
FASLG	0	0	0	0	0	0	0	0	0			0.639	0	0	0	0	0.088	0	0	0.149			0	0	0	0	-0.177	0.208	0	0.066	0.007
FAS	0	0	0	0	0	0	0	-0.002	0			0	0	0	0	0	0	0	0	0			0	0	0	0	0	0	0	0	0
FBN2	0	0	-0.049	0	-0.011	0	0	0	0			0	0	-0.084	0	0	0.11	0	0	0			0	0	0	0	0	0	0	0	0
FBXW7	0	0	0.048	0	-0.035	0	0	0	-0.011			0	0	0.191	0	0	0	-0.096	0	0			0	0	0	0	0	0	-0.254	0	0
FCGR2B	0	0	0	0	0	0	0.023	0	-0.047			0	0	0.117	0	0	0	0.14	0	0			0	0	0	0	0	0	0	0	0
FCRL4	0	0	0	0	0	0	0	-0.033	0.013			0	0	0	0	0	0	0	-0.147	0.115			0	0	0	0	0	0	0	-0.344	0
FEN1	0	0	0	0	0.113	0	-0.004	0	0			0	0	0	0	0	0	0	0	0			0.287	0	0	0	0.337	0	0	0	0
FEV	0	0.039	0	0	-0.003	0	-0.007	0	-0.023			-0.091	0.09	0	0	0	0	0	0	0			0	0	0	0	0	0	0	0	0
FGF13	0	0	0	0.02	0	0	0	0	0			0	0	0	0	0.072	0	0	-0.097	0			0	0	0	0	0	0	0	0	0
FGF14	0.029	0	0	0	0	0	0	0	0			0	0	0	0	0	0	0	0	0			0.176	0	0	0	0	0	0.294	0	0
FGF19	0	0	0	0	0	-0.006	0	0	0			0	0	0	0	0	-0.097	0	0	0			0	0	0	0	0	0	0	0	0
FGF1	0	0	0	0	0	0	0	0	0			-0.162	0	0	0	-0.091	0	-0.225	0	0			0	0	0	0	0	0	0	0	0
FGF23	0	0	0	-0.009	0	-0.014	-0.002	0	0			0	0	0	-0.036	0	0	-0.254	0	0			0	0	0	0	0	0	0	0	0
FGF2	0	0	0.02	0	-0.002	0	0	0	0			0	0	0.108	0	0	0	0	0	0			0	0	0	0	0	0	0	0	0
FGF3	0	0	0	0	0	-0.021	0	0	0			0	0	0	0	0	0	0	0	0			0	0	0	0	0	0	0	0	0
FGF4	0	0.004	0	0	0	0	0	0	0			0	0	0	0	0	0	0	-0.095	0			0	0	0.966	-0.404	0	0	0	0	0
FGF6	0	0	0	0	-0.002	0	0	0	0			0.135	0	0	0.107	0	0	0	0	0			0	0	0	0	0	0.309	0	0	0
FGF8	0	0	0	0	0	0	0	0	0			0	0	0	0	0	0	0	0	0			0	0	0	0	0	0	0	0	0
FGF9	0.016	0	0	0	0	-0.032	0	0	0			0	0	0	0	0	-0.198	0	-0.202	0			0	0	0	0	0	0	0	0	0
FGFR1OP2	0	0	0	0	0	0	0	-0.041	-0.022			0	0	0	0	0	0	0	0	0			0	0	0.24	0	0	0	0	0	0
FGFR1OP	0	0.003	0	0	0	0	0	0	0.027			0	0	0	0	0	0	0	0	0			0	0	0	0	0	0	-0.481	0	0
FGFR2	0	0	0	0	0	0	0	0	0			0	0	0	0	0	0	0	0	0			0	0	0	0	0	0	0	0	0
FGFR3	0	0	0	0	0	0	0	0	0			0	0	0	0	0	0	0	0	-0.044			0	0	0	0	0	0	0	0	0
FGFR4	0.021	0	0	0	0	0	-0.009	0	-0.036			0	0	0	0	0	0	0	0.046	-0.069			0	0	0	0	0	0	0	0	0
FHL2	0	0	-0.001	0	0	0	0	0	0.059			0	-0.112	0	0	0	0.086	0	0	0			0	0	0	0	0	0	0	0	0.184
FH	0	0	0	0	0	0	0	0	0			-0.184	0.09	0	0	0.108	0	0	0	0			0	-0.054	0	0	0	0	0	0	0
FIGF	0	0	0	0	0	0	0	0	0			0	0	0	0	0	-0.158	0	0	0			0	0	0	0	0.24	0	0	-0.053	0
FLCN	0	0	0	0	0	0	0	0	0			0	0	0	0	0	0	0	0	0			0	0	0	0	0	0	0	0	0
FLNC	0	0	0	0	0	0	0	0	0			0	0	0	0	0	0	0	0	0			0	0	0	0	0	0	0	0	0
FLT1	-0.016	0	-0.017	0	-0.011	0	0	0	0			0	0	0	0	0	0	0	0.04	0			0	0	0	0	0	0	0	0	0
FLT3LG	0	0	0	0	-0.015	0	0	0	0			0	0	0	0	0	0	0	0	0			0	0	0	0	0	0	0	0	0
FLT3	0	0	0	0	0	0	0	0	-0.033			0	0	0	0	0	0	0	0	-0.073			0	0	0	0	0	0	0	0	-0.235
FLT4	0	0	0	0	0	0	0	0	-0.038			0.115	0	0	0	0	0	0	0	0			0	0	0	0	0	0	0	0	0
FLYWCH1	0	0	0	0	-0.023	-0.007	0	0	0			0	0	0	0	0	0	0.17	0	0			0	0	0	0	0	0	0.212	0	0
FNBP1	0	0	0	0	-0.012	0	0	0	0			0	0	0	0	0	0	0	0	0			0	0	0	0	0	0	0	0	0
FOSB	0	0	0	0	0	0	0.002	0	0			0	0	0	0	0	0	0	0	0			0	0	0	0	0	0.133	0	0	0
FOSL1	0	0	0	0	0	0	0	0	0			0	0	0	0	0	0	0	0	0			0	0	0	0	0	0	0	0	0
FOS	0	0	0	0	0	-0.003	0	0	-0.007			0	0	0	-0.08	0	-0.061	0	0	0			0	0	0	0	0	-0.114	0	0	0
FOXL2	0	0.01	0	0	0	0	-0.012	-0.005	0			0	0	0.065	0	0	0	0	0	0			0	0	0.32	0	0	0	0	0	0
FOXO1	0	0	0	0	0	0	0	-0.014	0			0	0	0	0	0	0	0	-0.086	0			0	0	0	0	0	0	0	0	0
FOXO3	0	0	0	0	0.004	0	0	0	0			0	0	0	0	0	0	0	0	0			0	0	0	0	0	0.095	0	0	0
FOXO4	0	0	0	0.012	0	0	0	0.027	0			0	-0.081	0	0	0	0	0	0.049	0			0	0	0	0	0	0	0	0	0
FRK	0	0	-0.007	0	0	0	0	0	0			0	0	0	0	0	0	0	0	0			0	0	0	0	0	0	0	0	0
FRMPD4	0	0	0	0	0	0	0	0	0			0	0	0	0	0	0	0	0	0			0	0	0	0	0	0	0	0	0
FRS2	0	-0.009	0	0	0	0	0	0	0			0	0	0	0	0	0	0	0	0			0	-0.006	0	0	0	0	0	0	0
FRYL	0	0.028	0	0	0	0	0	0	0			0.03	0.074	0.074	0	0	0	0.062	0	0			0	0	0	0	-0.065	0	0	0	0
FSTL3	0	0	0	0	0	0	0	0	0			0	0	0	0	0	0	0	0	0			0.169	0	0	0	0	0	0	0	0
FUS	0	0	0	0.001	0.054	0.08	0	0	0			0	0	0	0	0.023	0.131	0	0	0			0	0	0	0	0	0.304	-0.205	0	0
FUT1	0	0	0	-0.007	0	0	0	0	0			0	0	0	0	0	0	0	0	0			0	0	0	0	0	0	0	0	0
FZD10	0	0	0	0	-0.003	0	0	0	0			0	0	0	0	0	0	0	0.08	0			0	0	0	0	0	0	0	0	0
FZD2	0	0	-0.007	0	0	0	0	0	0			0	0	0	0	0	0	0	0	0			0	0	0	0	0	0	0	0	0
FZD3	0.12	0.02	0	0	0	0.056	0.007	0	0			0	0	0	0	0	0.059	0	0	0			0.194	0	0	0	0	0	0.252	0	0
FZD6	0	0	0	0	0	0	0	0	0			0	0	0	0	0.137	0.101	0.158	0	0			0	0	0	0	0	0	0	0	0
FZD7	-0.008	0	0	-0.015	0	0	0	0	0			0	0	0	0	0	0.045	0	0	0			0	0	0.19	-0.226	0	0	0.198	0	0
FZD8	0	0.007	-0.004	0	0	0	-0.023	0	0			0	0	-0.118	0	0	0	-0.066	0	0			0	0	0	0	0	0	0	0	0
GAB1	0	0	0	0	0	0	0	0.007	0			0.128	0	0	0	0	0	0	0.221	0			0	0	-0.194	0	0	0	-0.388	0.525	0
GANAB	0.007	0	-0.029	0	0	0	0	0	0			0	0	0	0	0	0	0	0	0			0	0	0	0	0	0	0	0	0
GAS1	0	0	0	0	0	0	0	0	0			-0.091	0	0	0	0	0	0	0	0.084			0	0	0	0	0	0	0	-0.085	0.183
GAS5	0	0	0	0	0	0	0	0	0			-0.022	0	0	0	0	0.06	0	0	0			0	0	0	0	0	0	0	0	0
GAS7	0	-0.007	0	0	-0.053	0	0	-0.03	0			0	-0.106	0	0	-0.199	0	0	-0.113	0			0	0	0	0	0	-0.244	0	0	0
GATA1	0	0.104	0	0	-0.05	0	0	0	0			0	0	0	0	-0.198	-0.03	-0.121	0	0			0	0.247	0	0	0	0	0	0	0
GATA6	0	0	0	0	0	0	0	0	0			0	0	0	0	0	0	-0.191	0	0			0	0	0	0	0	0	0	0	0
GBP2	0	0	0	0	0	0	0	0	0			0	0	0	0	0	0	0	0	0			0	0	0	0	0	0	-0.139	0	0
GHR	0	0	0	-0.04	0	0	0.125	0	0.041			0	0	0	0	0	0	0.126	0	0.103			0	0	0	0	0.159	0	0	0	0
GIT2	0	0	0	0	0	0	0	0	0			0	0	0	0	0	0.048	0	0	0			0	0	0	0	0	0	0	0	0
GLI1	0	0	0	0	0	0	0	0	0			0	0	0	0	0.027	0	0	0.002	0			0	0	-0.047	0	0	0	0	0	0
GLI3	0	0	0	0	-0.079	0	-0.007	0	0			0	0	0	0	0	0	0	0.063	0			0	0	0	0	0	0	0	0	0
GMPS	0	0	0	0	0	-0.014	0	0	0.004			0	0	0	-0.162	0	0	0.112	0	0			0	0	0	-0.204	0	0	0	0	0
GNA13	0	0	0	0	0	0	0	0	0			0	0	0	0	0	0.091	0	0	0			0	0	0	0	0	0	0	0	0
GNAI1	0	0	0	0	0	0	0	0	-0.06			0	0	0	0	0.225	0	0	0	-0.137			0	0	0	0	0	0	0.228	0	-0.409
GNAQ	0	0	0	0	0.002	0	0	0	0			0	0	0	0	0	0	0	0	0			0	0	0	0	0	0	0	0	0
GNG4	0	0	0	0	0	0	0	0	0.016			0	0	0	0	0	0	0	0	0			0	0	0	0	0	0	0	0.132	0
GOLGA5	-0.001	0	0	0	0	0	0	0	0			-0.121	0	0	0	0	0	0.209	0	0			0	0	0	0	0	0	0	0	0
GOPC	0	0	0	0	0.011	0	0	0	0			0	0	0	0	0	0	0	0	0			0	0	0	0	0	0	0	0	0
GOSR1	0	0	0	0	0.017	0	0.022	0	0			0	0	-0.069	0	0	0	0	0	0			0	0	0	0	0	0	0	0	0
GOT1	0.048	0	0	-0.005	0.02	-0.037	-0.02	-0.022	0			0	0	0	0	0	0	0	0	0			0	0	0	0	0	0	0	0	0
GPC3	0	0	0	0	0.031	0	0	0	0			0	0	0	0	0.14	0	0	0	0			0	0	0	0	0	0	0	0	0
GPHN	0	0	0	0	0	0	0	0	0			0	0	0	0	0	0	0	0	0			0	0	0	0	0	0	0.309	0	0
GPR34	0	0	0	0	0.022	0.034	0	0	0.016			0	0	0	0	0	0.047	0.216	0	0			0	0	0	0	0	0	0	-0.096	0
GRIN2A	0	0	0	0	0	0	0	0	0			0.076	0	0	0	0	0	0	0	0			0.101	0	0	0	0	0	0	0	0
GRIN2B	0	0	0	0	0	0	0	0	0			0	0	0	0	0.053	0	0	0	0			0	0	0	0	0.387	0.104	0	0.437	0
GRM1	0	0	-0.01	0	0	0	0	0	0			0	0	-0.262	0	0	0	0	0	0			0	0	0	0	0	0	0	0	0
GRM3	0	0	-0.076	0	0	0	0	0	-0.028			0	0	-0.098	0	0	0	0	0	-0.264			0	0	-0.335	0	0	0	0	0	0
GSK3B	0	0	0	0	0	0	0	0	0			0	0	0	-0.095	0	0.124	0	0	0			0	0	0	0	0	0	0	0	-0.237
GSTT1	0	0	0.019	0	0.005	0	0	0	0			0	0	0	0	0	-0.134	0	0	0			0	0	0	0	0	0	0	0	0
GTSE1	0	0	0	0	0	0	0	0	0			0	0	0.261	0	0	0	0	0	0			0	0	0	0	0	0	0	0	0
H3F3A	0	0	0	0	0	-0.007	0	0	0			0	0	0	0	0	0	0	0	0			0	0	0	0	0	0	0	0	0
HAS2	0	0	0	0	0	0	-0.002	0	0			0	0	0	0	0	0	0	0	0			0	0	0	0	0	0	0	0	0
HDAC1	0	0	0	0	0	0	0	0	0			0	0	0	0	0	0	0	0	0			0	0	0	0	0	0	0	0	0
HDAC2	0	0	0	0	0	0	0	0	0			0	0	0	0	-0.071	-0.066	0	0	0			0	0	0	0	0	0	0	0	0
HDAC3	0	0	0	0	0	0	0	0	0			0	0	0	0	0	0	0	0	0			0	0	0	0	0	0	0	0	0
HDAC6	0	0	0	0	0	0	0	0	0			0	0	0	0	0	0	0	0	0			0	0	0	0	0	0	0	0	0
HEPH	0	0	0	0	0	0	0	0	0			0	0	0	0	0	0	0	0	0			0	0	0	0	0	-0.077	0	0	0
HERPUD1	0	0	0	0	0	0	0	0	0			0	0	0	0	0	0	0	0	0			0	0	0	0	0	0	0	0	0
HES1	0	0	0	0	0	0	0	0	0			0	0	0	0	0	-0.182	0	0	0			0	0	0	0	-0.241	0	0	0	0
HES5	0	0	0	-0.021	0	0	0	-0.005	0			0	0	0	0	0	0	0	0	0			0	0	0	0	0	0	0.097	0	0
HHEX	0	0	0	0	0	0	0	0	0			0	0	0	0	0	0	0	0	0			0	0	0	0	-0.155	0	0.661	0	0
HIP1	0	0	0	0	0	0.018	0	0	0			0	0	0	0	0	0	0	0	0			0	0	0	0	0	0	0	0	0
HIPK1	0	0	0	0	0	0	0	0	0			0	0	0	0	0	0	0	0	0			0	0	0	0	0	0	0	0	0
HIPK2	0	-0.01	0	0	0	0	0	0	0			0	0	0	0	0	0	0.149	0	0			0	0	0	0	0	0	0	0	0
HIST1H1C	0	0	0	0	0	0	0	-0.02	0			0	0	0	0	0	0	0	0	0			0	0	0	0	0	0	0	0	0
HIST1H1D	0	0	0	0	0	0	0	0	0			0	0	0	0	0	0	0	0	0			0	0	0	0	0	0	0	0	0
HIST1H1E	0	0	0	0	0	0	0.001	0	0			0	0	0	0	0	0	0.211	0	0			0	0	0	0	0	0	0	0	0
HIST1H2AC	0	0	0	0	0	0	0	0	0			0	0	0	0	0	-0.14	-0.055	0	0			0	0	0	0	0	-0.134	0	-0.19	0
HIST1H2AG	0	0	0	0	-0.001	0	0	0	0			0	0	0	0	0	0	0	0	0			0	0	0	0	0	0	0	0	0
HIST1H2AL	-0.022	0	-0.006	0	0	0	0	0	0			-0.131	-0.005	-0.003	-0.003	-0.001	-0.066	-0.003	-0.001	-0.487			0	0	0	0	0	0	0	0	0
HIST1H2AM	0	0	0	0	0	0.001	0	0	0			0	0	0	0	0	0	0	-0.046	0			0	0	0	0	0	0	0	0	0
HIST1H2BC	0	0.021	0	0	0	0	0	0	0			0	0.124	0	0	0	0	0	0	0			0	0	0	0	0	0	0	0	0
HIST1H2BJ	0.057	0	-0.076	0	0	0	0	0	0			0	0	0	0	0	0	0	0	0			0.169	0	0	0	0	0	0	0	0
HIST1H2BK	0	0	0	-0.019	0	0	0	0	0			0	0	0	0	0	0	0	0	0			0	0	0.077	0	0	0	0	0	0
HIST1H2BO	0	0	0	0	-0.014	0	0.001	-0.032	0			0	0	0	0	-0.079	0	0	-0.147	0			-0.092	0	0	0	0	0	0	-0.279	0
HIST1H3B	0	0	0	0	0.021	0	0	0	0			0	0	0	0	0	0	0	0	0			0	0	0	0	0	0	0	0	0
HIST1H4I	0	0	0	0	0	-0.038	0.043	0	0			0	0	0	0	0	-0.057	0.108	0	0			0	0	0	0	0	0	0.341	0	0
HLF	0	0	0	0	0	0	0	0	0			-0.051	0	0	0	0	0	0	0	0			0	0	0	0	0	0.301	0	0	0
HMGA1	0	0	0	0	0	0	0	0	0			0	0	0	0	0	0	0.213	0	0			0	0	0	0	0	0	0	0	0
HMGB1	0	0	0	0	0	0	0	0	0			0	0	0	0	0	0	0	0.072	0			0	0	0	0	0	0	0	0	0
HNRNPA2B1	0	0	0	0	0	0	0	-0.008	0			0	0	0	0	0	0	0	0	0			0	0	0.385	0	0	0	0.414	0	0
HOXA11	0	0	0	-0.021	0	0	0	0	0			0	0	0	0	0	0	0	0	0			0	0	0	0	0	0	0	0	0
HOXA13	0	-0.003	0	0	0	0	0	0	0			0	0	0	0	-0.145	0	0	0	-0.122			-0.203	0	0	0	0	0	0	0	0
HOXA3	0	0	0	0	0	0	0	0	0			0	0	0	0	0	0	0	0	0			0	0	0	0	0	0	0	0	0
HOXA9	0	0	0	0	0	0	0	0	0			0	0	0	0	0	0	0	0	0			0	0	0	0	0	0	0	0	0
HOXC13	0	0	-0.008	0	-0.006	0	0	-0.021	-0.018			0	-0.035	-0.027	0	0	0	0	-0.032	-0.002			0	0	0	0	0	0	0	0	0
HOXD11	0	0	0	0	0	0	0.047	0	0			0	0.041	0	0	0	0	0.19	0	0			-0.124	0	0	0	0	0	0	0	0
HOXD9	-0.028	0	0	0	0	0	-0.036	0	0			0	0	0	0	0	0.017	0	0	0			0	0	0	0	0	0	-0.26	0	0
HRAS	0	0	0	0.054	0	0.005	-0.003	0	0			0	0	0	0	0	0	0	0	0			0	0	0	0	0	0	0	0	0
HSPA1A	0	0	0	0	0	0	0.025	0	0			0	0	0	0	0	0.138	0	0	0			0	0.204	0	0	0	0	0	0	0
HSPA2	0	0	0	0	0	0	0	-0.011	0			0	0	0	0	0	0	0	0	0			0	0	0	0	0	0	0	0	0
HSPA4	0	0	0	0	0	-0.085	0	0	0			0	0	0	0	0	-0.275	0	0	0			0	0	0	0	0	-0.372	0	0	0
HSPA5	0	0	0	0	-0.014	0	0	0	0			0	0	0	0	0	0	0	0	0			0	0	0	0	0	0	0	0	0
HTRA1	0	-0.023	0	0	0.003	0	0	0	0			0	0	0	0	0	0	0.23	0	0			0	0	0	0	0	0	0	0	0
IBSP	0	0	0.004	0	0	0	0	0	0			0	0	0	0	0	0	0	0	0			0	0	0	0	0	0	0	0	0
ICAM1	0	0	0	0	0	0	0	0	0			0	0	0	0	0	0	0	0	0			0	0	0	0	0	0	0	0	0
ICK	0.004	0	0	0	0	0	0	0	0			0	0	0.212	0	0	0	0	0	0			0	0	0	0	0	0	0	0	0
ID1	0	0	0	0	0	0	0	0.003	0			0	0	0	0	0	0	0	0	0			0	0	0	0	0.226	0	0	0	0.23
ID3	0	0	0	0	0	0	0	0	0			0	0	0	0	0	0	0	0	0			0	0	0	0	0	0	0	0	0
ID4	0	0	0	0.035	0	0	-0.038	0	0			0	0.045	0	0	0	0	-0.127	0	0			0	0	0	0	0.099	0	0	0	0
IDH1	0	0	0	0	0	0	0	0	0			0	0	0	0	0	0	0	0	0			0	0	0	0	0	0	0	0	0
IDH2	0	0	0	0	0	0	0.004	0	0			0	0	0	0	0	0	0.158	0	0			0.113	0	0	0	0	0	0.282	0	0
IFNG	0	0	0	0	0	0	0	0	0			0	0.017	0.051	0	0	0	0	0.104	0			0	0	0	0	0	0	0	0.38	0
IFRD1	0	0	0	0	0	0	0	0	0			0	0	0	0	0	0	0	0	0			0	0	0	-0.12	0	0	0	0	0
IGF1	0.008	0	0	0	-0.037	-0.032	0	0	0			0	0	0	0	0	0	-0.114	0	0			0.253	0	0	0	0	0	0	0	0
IGFBP2	0	0	0	0	0	0	0	0	0			-0.005	0	0	0	0	0	0	0	0			0	0	0	0	0	-0.149	0	0	0
IGFBP3	0	0	0	0	0	0	0	-0.022	0			0	0	0	0	0	0	-0.151	0	0			0	0	0	0	0	0	0	0	0
IKBKB	0	0	0	0	0	-0.015	0	0	0			0	0	0	0	0	0	0	0	0			0	0	0	0	0	-0.199	0	0	0
IKBKE	0	0	0	0	0.023	0	0	0	0			0	0	0.127	0	0.086	0	0	0.002	0			0	0	0.113	0	0	0	0	0.136	0
IKZF1	0	0	0	0	0	0	-0.011	0	0			0	0	0.062	0	-0.116	0	0	0	-0.096			0	0	0.16	0	0	0	0	0	-0.109
IKZF2	0	0.045	0	0	0	0	0	0	0			0.023	0	0	0	0	0.147	0	0	0			0	0	0	0	0	0	0	0	0
IKZF3	0	0	0	0	0	0	0.041	0	0			0.064	0	0	0	0	0	0	0	0			0	0	0	0	0	0	0	0	0
IL12RB2	0	0	0	0	0	0	0.012	0	0			0	-0.08	0	0	0	0	0	0	0			0	0	0	0	0	0	0	0	0
IL13RA2	0	0	0	0	0	0	0	0	0			-0.046	0	0	0	0	-0.049	-0.051	0	0			0	0	0	0	0	0	0	0	0
IL13	0	0	0	0	0	0	0	0	0			0	0	0	0	0	0	0	0	0			0	0	0	0	0	0	0	0	0
IL15	0	0	0	0	0	0	0	0	0			0	0	0	0	0	0	0	0	0			0	0	0	0	0	0	0	0	0
IL1B	0	0	0	0	0	0	0	0	0			0	0	0	0	0	0	0	0	0			0	0	0	0	0	0	0	0	0
IL1R1	0	0	0	0	0	0	0	0	0			0	0	0	0	0.103	0	0	0	0			0	0	0	0	0	0.286	0	0	0
IL1RAP	0	0	0	0	0.077	0	0	0	0			0	0	0	0	0.201	0	-0.182	0	0			0	0	0	0	0	0	0	0	0
IL21R	0	0	0	0	0	0	0	0	0			0	0	0	0	0	0	0	0	0			0	0	0	0	0	0	0	0	0
IL2RA	0	0	0	0	0	0	0	0	-0.013			0	0	0	0	0	0	0	0	0			0	0	0	0	0	0	0	0.365	-0.358
IL2	0.011	0	0	0	0	0	0	0	0			0.003	0	0	0	0	0	0.055	-0.175	0			0	0	0	0	0	0	0	0	0
IL3	-0.002	0	0	0	0	0	0	0	0			0	0	0	0	0	0	0	0	0			0	0	0	0.165	0	0	0	0	0
IL6	0	0	0	0	0	0	0	0	0			0	0	0	0	0	0	0	0	0			0	0	0	0	0	0	0	0	0
IL7R	0	0	0	0	0	0	0	0	0			0	0	0	0	0	0.075	0	0	0			0	0	0	0	0	0	0	0	0
CXCL8	0	0	0	0	0	0	0	0	0			0	0	0	0	0	0	0.057	0	0			0	0	0	0	0	0	0	0	0
INHBA	0	0	0	0	0	0	0	0.002	0			-0.08	0	0	0	0	0	0	0	0			0	0	0	0	0	0	0	0	0
INPP4A	0	0	0	-0.011	0	0.005	0	0	0			0	0	0	0	0	0	0.049	0	0			0	0	0	0	0	0	0.151	0	0
INPP4B	0	0	0	0	0	0	0	0	0			0	0	0	0	0	0	0	-0.144	0			0	0	0	0	0	0	0	0	0
INPP5A	0	0	0	0	0	0	0	0.034	0			0	0	0	0	0	0	0	0.107	0			0	0	0	0	0	0	0	0	0
INPP5D	0.014	0	0	0	0	-0.015	0	-0.007	-0.021			0	0	0	0	0	0	0	0	0			0	0	0	0	0	0	0	0	0
IQCG	-0.031	0	0	0	-0.016	0	0	0	0			0	0	0	0	0	0	0	0	0			0	0	0	0	0	0	0	0	0
IRF1	-0.002	0	0	-0.026	0	0	0	0	0			0	0	0	-0.051	0	0	0	0	0			0	0	0	0	0	-0.219	0	0	0
IRF8	0	0	0	0	0	0	0	0	0			0	0	0	0	0	0	0	0	0			0	0	0	0	0	0	0	0	0
IRS4	0.063	0	0	0	0	0	0	0	0			0.091	0	0	0	0	0	0	0	0			0.267	0	0	0	0	0	0	0	0
ITGA5	0	0	0	0	0.003	0	0	0	0			0	0	0	0	0	0.208	0	0	0			0	0	0	0	0	0	0	0.106	0
ITGA7	-0.01	0	0.006	0	0	0	0	0	0			0	0	0	0	0	0	0	0	0			0	0	0	0	0	0	0	0	0
ITGA8	0	0	0.017	0	0	0	0	0	0			0	0	0	0	0	0	-0.13	0	0			0	0	0	0	0	0	0	0	0
ITGB3	0.016	0	0	0	0	0	0	0	0			0.07	0	0	0	0	0	0	0	0			0	0	0	0	0	0	0	0	0
ITK	0.005	0	0.004	0.004	0	0	0	0	0			0	0	0	0	0	0	0	0.095	0			0	0	0	0	0	0	0	0	0
ITPKA	0	0	0	0	0	0	0	0	0			0	0	0	0	0	0	0	-0.013	0			0	0	0	0	0	0	0	0	0
JAG2	0	0	0	0	0	0	0	0	0			0	0	0	0	0	0	0	0	0			0	0	0	0	0	0	0	0	0
JAK1	0	0	0	0	0	0	0	0	0			0	0	0	0	0	0	0	0	0			0	0	0	0	0	0	0	0	0
JAK2	0	0	0	0	0	0	0.001	0	0			0	0	0	0	0	0	0.379	0	0			0	0	0	0	0	0	0.262	0	0
JAK3	0	0	0	0	0	0	0	0	0			0	0	0	0	0	0	0	0	0			0	0	0.584	0	0	0	0	0	0
JARID2	0	0	0.015	0	0	0	-0.025	0	0.018			0	0	0	0	0	-0.374	0	0	0			0	0	0	0	0	0	0	0	0.162
JAZF1	0	0	0	0	0	0	0	0	-0.001			0	0	0	0	0	0	0	0	0			0	0	0	0	0	0	0	0	0
JUN	0	0	0	0	0	0	0	0	0			0	0	0	0	0	0	0	0	0			0	0	0	0	0	0	0	0	0
KAT2B	0	0	0	0	0	0	0	0.015	0			0	0	0	0	0	0	0	0.066	0			0	0	0	0	0	0	0	0	0
KCNB1	0	0	0.005	0	0	0	0	0	0			0	0	0	0	0	0	0.132	0	0			0.107	0	0	0	0	0	0	0	0
KDM2B	0	0	0	0	0	0	0	0	-0.004			0	0	0	0	0	0	0	0	0			0	-0.235	0	0	0.322	0	0	0	0
KDM4C	0	0	0	0	0	0	0	0	0			0	0	0	0	0	0	0	0	0			0	0	0	0	0	0	0	0	0
KDM5A	0	0	0	0	0	0	0	0	0			0	0	0	0	0	0	0	0	0			0	0	0	0	0	0	0	0	0
KDM5C	0	0	0	0	0	0	0	0	0			0	0	0.198	0	0	0	0	0	0			0	0	0	0	0	0	0	0	0
KDM6A	0	0	0	0	0	0	0	0	0			0	0	0	0	0	0	0	0.153	0			0	0	0	0	0	0	0	0	0
KDR	0	0.015	0	0	0	0	-0.032	0	0			0	0	0	0	0	0	0	0	0			0	0	0	0	0	0	0	-0.15	0
KDSR	0	0	0	0	0.089	0	0	0	0			0	0	0	0	0	0	0	0	0			-0.067	0	0	0	0	0	0	0	0
KEAP1	-0.029	0	0	0	0	0.015	0.008	0	0			-0.033	0	0	0	0	0	0	0	0			0	0	0	0	0	0	0	0	0
KIAA0232	0	0	0	0	0	0.053	0	0	0			0	0.103	0	0	0	0.057	0	0	0			0	0	0	0	0	0.306	0	0	0
ATG13	0	0	0	0	-0.019	0	0	0.016	0			0	0	0	0	0	0	0	0	0			0	0	0	0	0	0	0	0	0
KIAA1524	0	0	0	0	0	0	0	0	0			0	0	0	0	0	0	0	0	0			0	0	0	0	0	0	0	0.2	0
CCAR2	0	0	-0.002	-0.029	-0.042	0	-0.041	0	0			-0.005	-0.247	-0.107	-0.134	-0.152	-0.025	-0.101	-0.001	-0.068			0	0	0	0	0	0	0	0	0
KIT	0	0	0	0.04	0	0	0	0	0			0	0	0	0	0	0	0	0	0			0	0	0	0	0	0	0.247	0	0
KLF4	0	0	0	0	0	0	0	0	0			0	0	0	0	0	0	0	0	0			0.341	-0.258	0	0	0	0	0	0	0
KLHL6	0	0	0	0	0	-0.042	0	0	0			0	0	0.2	0.189	0	0	0	0	0			0	0	0	0	0	0	0	0	0
KPNB1	0	0	0	0	0.024	0.005	0	-0.046	0			0	0	0	0	0	0	0.034	-0.208	0			0	0	0	0	0.396	0	0	0	0
KSR1	-0.006	0	0	0	-0.072	0	0	-0.032	0			0	0	0	0	-0.077	0	0	-0.089	0			0	0	0	0	0	0	0	0	0
LAMA1	0	-0.001	0	0	-0.005	0	0	-0.016	0			0	-0.069	-0.124	0	-0.257	-0.003	-0.106	-0.055	-0.12			0	0	0	0	-0.862	0	0	0	0
LAMA5	0	0	0	0	-0.028	0	0	0	0			0	0	0	0	-0.087	-0.112	-0.08	0	0			0.088	0	0	0	0	-0.162	0	0	0
LAMP2	0.034	0	0	0	0	0	0	0.025	0			0	0	0	0	0	0	0.068	0	0			0	0	0	0	0	0	0	0	0
LASP1	0	0	0	0	0	0	0.019	0	-0.01			0	0	0	0	0	0	0	0	0			0	0	0	0	0	0	0	0	0
LCK	0	0	0	0	0	0	0	0	0			0	0	0	0	0	0	0	0	0			0	0	0	0	0	0	0	-0.072	0
LEF1	0	0	0	0	0	0	0	0	0			0	0	0	0	0	0	0	0	0			0	0	0	0	0	0	0	0	0
LEFTY2	0	0	0	0	0	0	0	0	0			0	0	0	0	0	0	0	-0.07	0			0	0	0	0	0	0	0	0	0
LGALS3	0	0	0	0	0	0	0	0	0			0	0	0	0	0	0	0.102	0	0			0	0	0	0	0	0	0	0	0
LGR5	-0.018	0	-0.003	0	0	0	0	0	0			-0.06	0	0	0	0	-0.26	0	-0.002	0			-0.061	0	0	0	0	0	0	0	0
LHFP	0	0	0	0	0	0	0	0	0.005			0	0	0	0	0	0	0	0	0			0	0	0	0	0	0	0	0	0
LHX2	0	0	0	-0.021	-0.018	0	0	0	0			-0.042	0	0	-0.12	-0.073	0	0	0	0			0.208	0	0	0	0	0	0	0	0
LHX4	0	0	0	0	0	0	-0.03	0	0			0	0	0	0	0	0	-0.145	0	0			0.122	0	0	0	0	0	0	0	0
LINGO2	0	0	0	0	0	0	0	0	0			0	0	0	0	0	0	0	0	0			0	0	0	0	0	0	0	0	0
LMO1	0	0	0	0	0	0	0	0	0			0	0	0	0	0	0	0	0	0			0	0	0	0	0	0	0	0	0
LMO2	0.049	0	0	0	0.009	0	0	0.041	-0.029			0.056	0	0	0	0	0	0	0	0			0	0	0	0	0	0	0	0	0
LMO7	0	0	0	-0.014	0	0.012	0	0	0			0.1	0	0	0	0	0.28	0	0	0			0	0	0	0	0	0	0	0	0
LNP1	-0.011	-0.014	0	0	0	0	-0.008	0	0			0	-0.019	0	0	0	-0.06	0	0	0			0	0	0	0	0	0	0	0	0
LINC00598	0	0.045	0	0	0	0	-0.024	0	0			0	0	0	0	0	0	0	0	0			0	0	0	0	0	0	-0.09	0	0
LOX	0	0	0	0	0	0	0	0	0			0	0	0	0	0	0	0	0	0			-0.129	0	0	0	0	0	0	0	0
LPAR1	0	0	0	0	0	0	0	0	0			0	0	0	0	0	0	0	0	0			0	0	0	0	0	0	0	0	0
LPP	0	0	0	0	0	0	0	0	0			0	0	0	0	0	0	0	0	0			0	0	0	0	0	0	0	0	0
LPXN	0	0	0	0	0	0	0	0	0			0	0	0	0	0	0	0	0	0			-0.201	0	0	0	0	0	0	0	0
LRIG3	0	0	0	0	0	0	0	-0.003	0			0	0	0	0	0	0	0	0	0			0	0	0.145	0	0	0	0	0	0
LRMP	0	0	0	0	0	0	0	0	0			0	0	0	0	0	0	0.039	0	0			0	0	0	0	0	0	0	0	0
LRPPRC	0	0	0	0	0	0	0	0	0			0	0	0	0	0	0	0	0	0			0.109	0	0	0	0	0	0	0	0
LRRC37B	0	0	0	0	0	0	0	0	0			0	0	0	0	0	0	-0.163	0	0			0	0	0	0	0	0	0	0	0
LRRC59	0	0	0	0	0.042	0	0	0	0			0	0	0	0	0.108	0	0	0	0			0	0	0	0	0.285	0	0	0	0
LRRC7	0	0	0	-0.013	0	0	0	0	0			0	0	0	0	0.04	0	0	0	0			0	0	0	0	0	-0.366	0	0	0
LTBP1	0	0.008	0	0	0.014	-0.018	0	0	0			0	0	0	0	0.044	0	0	0	0			0	0	0	1.179	0	0	0	0	0
LYL1	0.005	0	0	0	0	0	0	0	0			0	0	0	0	0	0	0	0	0			0	0	0	0	0	0	0	0	0
LYN	0	0	0	0	0	0	0	0	0			0	0	0	0	0	0	0	0	0			0	0	0	0	0	0	0	0	0
MACROD1	-0.006	0	0	0	0	0	0	0	0			0	0	0	0	0	0	0	0	0			0	0	0	0	0	0	0	0	0
MAD2L1	0	0	0	0	0	0	0	0	0			0	0	0	0	0	0	0.032	0	0			0	0	0	0	0	0	0	0	0
MADD	0	0	0.015	0	0	0	0	0	0			0	0	0	0	0	0	0	0	0			0	0	0	0	0	0	-0.092	0	0
MAF	0	0	0.028	0	0	0	0	-0.003	0			0	0	0	0	0	0	0	0	0			0	0	0	0	0	0	0	-0.17	0
MAGED1	0	0	0	0	0	0.005	-0.005	0	0			-0.069	0	0	0	0	0	-0.171	0	0			0	0	0	0	0	0	0	0	0
MAGEE1	0	0	0	0	0	0.007	0.016	0	0			0	0	0	0	0	0.115	0	0	0			0	0	0	-0.163	0	0	0	0	0
MALT1	0	0	0	0	0	0	0	0	0.004			0	0	0	0	0	0	0	0	0			0	0	0	0	0	0	0	0	0
MAML1	0	0	0	0	0	0	0	-0.008	0			0	0	0	0	0	0	0.12	0	0			0	0	0	0	0	0	0	0	0
MAML2	0	0	0	0	0	0	0	0	0			0	0	0	0	0	0	0	0	0			0	0	0	0	0	0	0	0	0
MAP2K1	0	0	0	0	0	-0.004	0	0	0			0	0	0	0	0	0	0	0	-0.066			0	0	0	0	0	0	0	0	0
MAP2K4	-0.046	-0.017	-0.071	-0.022	0	0	0	0	0			0	-0.05	0	0	0	0	0	0.035	0			0	-0.006	0	0	0	0	0	0	0
MAP2K5	0	0	0.039	0	-0.001	0	0	0	0			0	0	0.114	0	0	0	0	0.077	0			0	0	0	0	0	0	-3.815	0.198	0
MAP2K6	0	0.001	-0.051	0	0	0	0	0	0			0	0	-0.105	0	0	0	0	-0.629	0			0	0	0	0	0	0	0	-0.306	0
MAP2	0	0	0	0	0.006	0	0	0	0			0	0	0	0	0	0	0	0	0			0	0	0	0	0	-0.22	0	0	0
MAP3K14	0	0	0	0	0	0	0	-0.012	0			0	0	0	-0.237	0	-0.096	0	-0.135	0			0	0	0	0	0	-0.184	0	-0.346	0.228
MAP3K1	0	0	0	0	0	0	0	0	0			0	0	0	0	0	0	0	0	0			0	0	0	0	0	0	0	0	0
MAP3K6	0.046	0	0	0	0	0	0	0	0			0	0	0	0	0	0	0	0	0			0	0	0	0	0	0	0	0	0
MAP3K7	0	0	0	0	0	0	0	0	-0.024			0	0	0	0	0	0	0	0	0			0	0	0.287	0	0	0	0	0	0
MAPK1	0.027	0	0	0	0	0	0	0	0			0.068	0	0	0	0	0	0	0	0			0	0	0	0	0	0	0	0	0
MAPK3	0	0	0	0	0	0	0	0	0			0	0	0	0	0	0	0	0.12	0			0	0	0	0	0	0	0	0	0
MAPK8	0	0	0	0	0.015	0	0	0	0			0	0	0	0	0	0	0	0	0			0	0	0	0	0	0	-0.414	0	0
MAPRE1	0	0	0	0	0	0	0	0	0			0	0	0	0	0	0	0.129	0	0			0	0	0	0	0	0	0	0	0
MATK	0	0	-0.043	0	0	0	0	0	0			0	0	-0.061	0	0	0	0	0	0			-0.084	0	-0.349	0	0	0	0	0	0
MAX	0	0	0	0	0	0	0	-0.024	0			0	0	0	0	0	0	0	-0.059	0			0	0	0	0	0	0	0	0	0
MBNL1	0	0	0	0	0	0	0	0	0			0	0	0	0	0	0	0	0	0			0	0	0	0	0	0	0	0	0
MBTD1	0	0	0	0	0	0	0	0	0			0	0	0	0	0	0.082	0	0	0			0	0	0	0	0	0	0	0	0
MCL1	0	0	0	0	0	0	0.011	0	0			0	0	0	0	0	0	0	0	0			0	0	0	0	0	0	0	0	0
MDC1	0	0	0	0	0	0	0	0	0			0	0	0	0	0	0	0	0	0			0	0	0	0	0	0	0	0	0
MDH1	0	0	0	0	0.03	0	0	0	0			-0.059	0	0	0	0	-0.04	0	0	0			0	0	0	0	0	0	0	0	0
MDM4	0	0	0	0	0	0	0	0	0			0	0	0	0	0	0	0	0	0			0	0	0	0	0	0.098	0	0	0
MDS2	0	0	0	0	0	0	0	0	0			0	0	0	0	0	0	0	0	0			0	0	0	0	0	0	0	0	0
MEAF6	0	0	0	0	0	0	0	0	0			0	0	0	0	0	0	0	0	0			0	0	0	0	0	0	0	0	0
MEF2B	0	0	0	0	0	0	0	0	0.008			-0.097	0	0	0	0	-0.077	0	0.159	0			0	0	0	0	0	0	0	0	0
MEF2C	0	0	0	0	0	0	-0.017	0	0			0	0	0	0	0	0	0	0	0			0	0	0	0	0	0	0	0	0
MEF2D	0	0	-0.074	0	0	0	0	0	0			0	0	-0.326	0	0	0	0	0	0			0	0	-0.331	0	0	0	0	0	0
MELK	0	0	0	0	0	0	0	0	0			0	0	0	0	0	0	0	0	0			0	0	0	0	0	0	0	0	0
METTL7B	0	0	0	0	0	0	0	0	0			0.036	0	0	0	0	0	0	0.053	0			0	0	0	0	0	0	0	0	0
MET	0	0	-0.009	0	0	0	0	0	0			0	0	0	0	0.117	0	0.055	0.054	0			0	0	0	0	0	0	0	0	0
MFNG	-0.001	0	0	0	0	0	0	0	-0.008			0	0	0	0	0	0	0	0	0			0	0	0	0	0	0	0	0	0
MGMT	0	0	0	0	0	0	0.046	0	0			-0.158	0	0	0	0	0	0	0	0			0	0	0	0	0	0	0	0	0
MIB1	0	0	0	0	0	0	0	0	0			0	0	0	0	0	0	0.053	0	0			0	0	0	0	0	0	0	0	0
MKI67	0	0	0	0	-0.028	0	-0.063	0	-0.026			-0.086	0	0.117	0	0	0	0	0	0			0	0	0	0	0	0	0	0	0
MKL1	0	0	0	0	0	-0.035	0	0	0			0	0	0	0	0	0	0.066	0	0			0	0	0	0	0	0	0	0	0
CENPU	0	0	0	0	0	0	0	0	0			0	0	0	0	0	0	0	0	0			0	0	0	0	0	0	0	0	0
MLF1	0	-0.004	0	0	0	-0.017	0	0	0			0	0	0	0	0	0	0	0	0			-0.07	0	0	0	0	0	0	-0.135	0.078
MLH1	0	0	0	0	0	0	0	0.008	0			0	0	0	0	0	0	0	0	0			0	0	0	0	0	0	0	0	0
KMT2B	0	-0.014	0	0	0	0	0	0	0			0	0	0	0	0	0	0	0	0			-0.087	0	0	0	0	0.45	0	0	0
MLLT10	0	0.06	0	0	0.059	0	0	-0.007	0			0	0	0	0	0	0	0	0	0			-0.176	0	0	0	0	0	0.159	0	0
MLLT1	0	0	0	0	0	0	0	0	0			0	0	0	0	0	0	-0.08	0	0			0	-0.044	0	0	0	0	0	0	0
MLLT3	0	0	0	0	0	0	0	0	0			0	0	0	0	0	-0.158	0	0	0			0	0	0	0	0	0	0.829	0	0
MLLT6	0	0.013	0	-0.04	0	0.003	0	0	0			0	0	0	0	0	0	0	0.132	0			0	0	0	0	0	0	0	0	0
MMP7	0	0	0	0	0	0.003	0	0	0			-0.047	0	0	0	-0.044	0	0	0	0			0	0	0	0	0	0	0	0	0
MMP9	0	0	0	0	0	0	0	0	0			0	0	0	0	0	0	0	0	0			0	0	0	0	0	0	0	0	0
MNAT1	0	0	0	0	0	0	0.016	0.002	0			0	0	0	0	0	0	0	0	0			0	0	0	0	0	0	0	0	0
MPL	0	0	0	0	0	0	0	0	0			0	0	0	0	0	0	0	0	0			0	0	0	0	0	0	0	0	0
MRE11A	0	0	0	0	0	0	0	0	0			0	0	0	0	0	0	0	0	0			0	0	0	0	0	0	0	0	0
MSH2	0	0	0	0	0	0	0	0	0			0	0	0	0	-0.073	0	0	0	0			0	0	0.451	0	0	0	0	0	0
MSH6	0	0	0	0	0	0	0	-0.01	0			0	0	0	0	0	0	0.121	0	0			0	0	0	0	0	0.078	0	0	0
MSI2	0	0	0	0	0	0	0	0	0			0	0.002	0.064	0.09	0.219	0	0.145	0.092	0.11			0	0	0	0	0	0	0	0	0
MSN	0	0	0	0	0	0	0	-0.035	0			0	0	0	0	0	0	0	0	0			0	0	0	0	0	0.197	0	-0.318	0
MTUS2	0	0	0	0	0	-0.024	-0.008	0	0			0	0	0	0	-0.144	0	-0.218	0	0			0	0	0	0	0	0	0	0	0
MUTYH	0	0	0	0	0	0	0	0	0			0	0	0	0	0	0	0.084	0	0			0	0	0	0	0	0	-0.122	0	0
MYB	0	0	0	0	0	0	0.054	0	0			0	0	0	0	0	0	0	0	0			0	0	0	0	0	0	0	0	0
MYCL	0	0	0	0	0	0	0	0	0			0	0	0	0	0	0	0	-0.142	0			0	0	0	0	0	0	0	-0.08	0
MYCN	0	0	0	-0.012	0	0.028	0	0	0			0	0	0.249	0	0	0	0.079	0	0			0	0	0	0	0	0	0	0	0
MYC	0	0	0	0	0	0	0.037	0	0			0	0	0	0	0	0	0	0	0			0	0	0	0	0	0	0	0	0
MYD88	0	0	0	0	0	0.062	0	0	0			0	0	0	0	0	0	0	0	0			0	0	0	0	0	0.137	0	0	0
MYO1F	0	0	0	0	0	0	0	0	0			0	0	0	0	0	0	0	0	0			0	0	0	0	0	0	0	0	0
KAT6A	0	0	0	0	0	0	0	0	0			0	0	0	0	0	0	0	0	0			0	0	0	0	0.071	0	0	0	0
KAT6B	0	0	0	0	0	0	0	0	0			0	0	0	0	0	0	0	0	0			0	0	0.056	0	0	0	0	0	0
NAB2	-0.03	0	-0.005	0.016	0	0	0	0	0			0	0	0	0	0	0	0	0	0			0	0	0	0	0	0	0	0	0
NAPA	0	0	0	0	0	0	0	-0.05	0			0	0	0	0	0	0	0	0	0			0	0	0	0	0	0	0	-0.117	0
NBN	0	0	0	0	0	-0.003	0	0	0			0	0	0	0	0	-0.061	0	0	0			0	0	0	0	0	0	0	0	0
NBR1	0	0	0	0	0	0	0	0	0			0	0	0	0	0	0	0	0	0			0	-0.018	0	0	0	0	0	0	0
NCAM1	-0.015	0	0	-0.007	-0.043	0	0	0	0			-0.035	0	0	-0.049	0	0	0	0	0			0	0	0	0	0	0	0	0	0
NCKIPSD	0	0	0.018	-0.018	0	0	0	0	0			0	0	0	0	0	0	0	-0.051	0			-0.181	0	0	0	0	0	0	0	0
NCOA1	0.033	0	0	0	0	0	-0.013	0	0			0	0	0	0	0	0	0	0	0			0	0	0	0	0	0	-0.13	0	0
NCOA2	-0.011	0	0	0	0	0	0	0	0			0	0	0.236	0	0	0	0	0	0			-0.114	0	0	0	0	0	0	-0.169	0
NCOA3	0	0	-0.044	-0.002	0	0	0	0	0			0	0	0	0	0	0	0	0	0			0	0	0	0	0	0	0	0	0
NCOA4	-0.026	0	0	0	0	0	0.084	-0.017	0			0	0	0	0	0	0	0	0	0			0	0	0	0	0	0	0	0	0
NCOR2	0	0.028	0	0	0.054	0.084	0	0	0			-0.115	0	0	0	0	0.064	0.164	0	-0.05			0	0	0	0	0.378	0.447	0	0	0
NCSTN	-0.029	0	0	0	0	0	0	0	0			0	0	-0.199	0	0.093	0	0	0	0			0	0	0	0	0.135	0	0	0	0
NDC80	0	0	0	0	0	0	0	0	0			0	0	0	0	0	0	0	0	0			-0.201	0	0	0	0	0	0	0	0
NDUFAF1	0	0	0	0	0	0	0	0	0			0	0	0	0	0	0	0	0	0			0	0	0	0	0	0	0	0	0
NEDD4	0	0	0	0	0	0	0	0	0			0	0	0	0	0	0	0	0	0			0	0	0	0	0	0	0	0	0
NEURL1	0	0	0	0	0	0	-0.012	-0.01	0			0	0	0	0	0	-0.035	0	0	0			0	0	0	0	0	0	0	0	0
NF1	0	0	-0.097	0	0	0.002	0	0	-0.015			0	0	0	0	0	0	0	0	0			0	0	-0.35	0	0	0	0	0	0
NFATC1	0	0	0	0	0	0	0	0	0			0	0	0	0	0	0	0	0	0			0	0	0	0	0	0	0	0	0
NFATC2	0	0	0	0	0	0	0	0	0			0	0	0	0	0	0	0	0	0			0	0	0	0	0	0	0	0	0
NFE2L2	0	0	0	0	0	0	0	0	0			0	0	0	0	0	0	0	0	0			0	0	0	0	0	0	0	0	0
NFIB	-0.022	0	0	0	0	-0.002	0	-0.046	0			-0.083	-0.067	-0.115	0	-0.156	-0.173	0	-0.126	0			0	0	0	0	0	0	0	-0.087	0
NFKB1	0	0	0	0	0	0	0	0	0			0	0	0	0	0	0.198	0	0	0			0	0	0	0	0	0	0	0	0
NFKB2	0	0	0	0	0	0.069	0	0	0			0	0	0	0	0	0.124	0	0	0			0	0	0	0	0	0	0	0	0
NFKBIA	-0.013	0	0	0	0	0	0	0	0			0	0	0	0	0	0	0	0	0			0	0	0	0	0	0	0	0	0
NGFR	0	0	0	0	0	0	0	0	0			0	0	0	0	0	0	0.029	0	0			0	0	0	0	0	0	0	0	0
NGF	0	0	0	0	0	0	0	0	0			0	0	0	0	0	0.211	0	0	0			0	0	0	0	0	0	0	0	0
NIN	0	0	0	0	0	0	0	0	0			0	0	0	0	0	0	0	0	0			0	0	0	0	0	0	0	0	0
NIPBL	0	0	0	0.002	0	-0.035	0	0	0			0	0	0	0	0	0	0	0	0			0	0	0	0	0	-0.096	0	0	0
NKX2-5	0	0	0	0	0	0	0	0	0			0	0	0	0	0	0	0	0	0			0	0	0	0	0	0	0	0	0
NOD1	0	0	0	0	0	0	0	0	0			0	0	0	0	0	0	0	0	0			0	0	0	0	0	0	0	0	0
NODAL	0.04	0.027	0	-0.02	0	0	0	0	0			0	0	0	0	0	0	0	0	0			0	0	0	0	0	0	0	0	0
NOTCH2	0	0	0	0	0	0	0	0	0			0	0	0	0	0	0	0	0	0			0	0	0	0	0	0	0	0	0
NOTCH4	0	0	0	0	0	0	0	0	0			0	0	0	0	0	0	0.094	0	0			0	5.225	0	0	0	0	0	0	0
NPM1	0	0	0	0	0	0	0	0	0			-0.016	0	0	0	0	0	0	0	0			0	0	0	0	0	0	0	0	0
NR3C1	0	0	0	0	0	0	0	0	0			0	0	0	0	0	0	0	0	0			0	0	0	0	0	0	0	0	0
NR4A3	0.034	0	0	0	0	0	0	0	0.009			0	0	0	0	0	0	0	0	0			0	0	0	0	0	0	0	0	0
NR6A1	0	0	0	0	0	0	0	0	0			0	0	0	0	0	0	0	0	0			0	0	0	0	0	0	0	0	0
NRAS	0	0	0	0	0	0	0	0	0			0	0	0	0	0	0	0	0	0			0	0	0	0	-0.734	0	0	0	0
NT5C2	0	0	0	0	0.012	-0.014	0	0	0			0	0	0	0	0	-0.189	0	0	0			0	0	0	0	0	-0.215	0	0	0
NTF3	0	0.013	0	0	0	0	0	0	0			0	0	0	0	0	0	0	0	0			0	0	0	0	0	0	0	-0.09	0
NTF4	0	0	0	0	0	0	0	0	0			0	0	0	0	-0.045	0	0	0	0			0	0	0	0	0	0	0	0	0
NTRK2	0	0	0	0	0	0	0	0	0			0	0	0	0	0	0.08	0	0	0			0	0	0	0	0	0	-0.055	0	0
NTRK3	0	0	0	0	0	0	0	-0.003	0			0	0	0	0	0	0.027	0	0	0			0	0	0	0	0	0.107	0	0	0
NUMA1	-0.032	0	0	0	0	0	0.018	0	0			-0.084	0	0.06	0	0	0	0	0	0.051			0	0	0	0	0	0	0	0	0
NUP107	-0.049	0	0	0	0	0	0	0.004	0			0	0	0	0	0	0	0	0	0			0	0	0	-0.082	0	0	0	0	0
NUP214	0	0	0	0	-0.075	0	0	-0.002	0			0	0	0	0	0	0	0	0	0			0	0	0	0	0	0	0	0	0
NUP93	0	0	0	-0.01	0	0	0	0	0			0	0	0	0	0	0	0	0	0			0	0	0	0	0	0	0	0	0
NUP98	0	0	0	0	0	0	0	0	0			0	-0.034	0	0	0	0	0	0	0			0	0	0	0	0	0	0	0	0
TENM1	0	-0.014	0	0	0.023	0	0	0	-0.039			0	0	0	0	0	0	0	0	-0.135			0	0	0	0	0	0	0	0	-0.299
OLIG1	0	0	-0.003	0	0	0	0	-0.048	0			0	0	0	0	0	0	0	0	0			0	0	0	0	0	0	0	0	0
OLIG2	0	0	0	0	0.02	0.005	0	0	0			0	0	0	0	0	0	0	-0.054	0			0	0	0	0	0	0	0	0	0
OLR1	0	0	0	0	0	0	0	-0.01	0			0	0	0	0	0	0	0	0	0			0	0	0	0	0	0	0	0	0
OMD	0	0	0	0	0	0	0	0	0			-0.089	0	0	0	0	0	0	0	0			0	0	0	0	0	0	0	0	0
P2RY8	0	-0.013	0	0	0	0	0	0	0			0	0	0	0	0	0	0	0	0			0	0	0	0	0	0	0	0	0
PAFAH1B2	0	0	0	0	0.036	0	0	0	0			0	0	0	0	0.25	0.105	0	0	0			0	0	0	0	0	0	0	0	0
PAK1	0	0	0	0	0	0	0.05	0	0			0	0	0	0	0	0	0	0	0			0	0	0	0	0	0	0	0	0
PAK6	0	0	0	0	0.002	0	0	0	0			0	0	0	0	0	0	0	0	0			0	0	0	0	0	0	0	0	0
PAK7	0	0	0	0	0	0	0	0	0			0	0	0	0	0	0	0	0	0			0	0	0	0	0	0	0.227	0	0
PAPPA	-0.021	0	0	0	0	-0.002	0	0	0			0	0	0	0.102	0	-0.073	0	0	0			0	0	0	0.12	0	0	0.204	0	0
PASK	0	0	0	0	0	0	0	0	0			0	0	0	0	0	0	0.066	0	0			0	0	0.512	0	0	0	0	0	0
PATZ1	0	0	0	0	0	0	-0.019	0	0			0	0.161	0	0	0.057	0	0	0	0			0	0	0	0	0	0	0	0	0
PAX3	0	0	0	0	0	0	0	0	0			0	0	0	0	0	0	-0.122	0	0			0	0	0	0	0	0	0	-0.201	0
PAX5	0	0	0	0	0	0	0	0	0.043			0	0	0	0	0	0	-0.215	0.084	0			0	0	0	0	0	0	0	0	0
PAX7	0	0	0	0	0.007	0	0	0	0			0	0	0	0	0.085	0	0	0	0			-0.104	0	0	0	0	0	0	0	0
PAX8	0	0	0	0	0	-0.074	-0.015	-0.034	0			0	0	0	0	0	0	0	0	0			0	0	0	0	0	0	0	0	0
PCBP1	0	0	0	0	0	0	0	0	0			0	0	0	0	0	0.072	0	0	0			0	0	0	0	0	0	0	0	0
PCM1	0	0	0	0	0	0	0	0	0			0	0	0	0	0	0	0	0	0			0	0	0	0	0	0	0	0	0
PCNA	0	0	0	0	0	0.001	0	-0.043	0			0	0	0	0	0	0.074	0	0	0			0	0	-0.299	0	0	0	0	0	0
PC	0	0	0	0	0	-0.002	0	0	0			0	0	0	0	0	-0.09	0	0	0			0	0	0	0	0	0	0	0	0
PDCD11	0	0	-0.046	0	0	0	0	0	0.008			0	0	0	0	0	0	0	0	0			0	0	0	0	0	0	0	0	0
PDCD1LG2	0	0	0	0	0	0	0	0	0.021			0	0	0	0	0	0	0	0	0			0	0	0	0	0	0	0	0	0
PDE4DIP	-0.003	0	0	0	0	0	0	0.003	0			0	0	0	0	0	0	0.178	0	0.137			-0.105	0	0	0	0	0	0	0	0
PDGFA	0	0	-0.012	0	0	-0.02	-0.008	-0.018	0			0	0	0	0	0.122	-0.131	-0.056	0	0			-0.023	0	0	0	0	0	0	0	0
PDGFB	0	0	0	0	0	0	0	0	0			0	0.059	0	0	0	0	0	0	0			0	0	0	0	0	0	0	0	0
PDGFD	0	0	0.001	0.002	0	0	-0.012	0	0			0	0	0	0	0	0	0	0	0			0	0	0	0	0	0	0	0	0
PDGFRA	0	0	0	0	0	0	0	0	0			0	0	0	0	0	0	0	-0.093	0			0	0	0	0	0	0	0.12	-0.202	0
PDGFRB	0	0	0	0	0	0	0	0	0			0	0	0	0	0	0	0	0	0			0	0	0	0	0	0	0	0	0
PDK1	0	0.016	0	0	0	0	0.016	0	0			0	0	0	0	0	0	0	0	0			0	0	0	0	0	0	0	0	0
PEG3	0	0	0	0	-0.014	0	0	0	0			0	0	0	0	0	0	0	0	0			0	0	0	0	0	0	0	0	0
PER1	0	0	0	0	0	0	0	0	0			0	0	0	0	0	0	0	0	0			0	0	0	0	0	0	0	0	0
PFDN5	0	0	0	0	0	0	0	0	0			0	0	0	0	0	0	0	0	0			0	0	0	0	0	0	0	0	0
PHB	0	0	0	0	0	0	0	0	0			0	0	0	0	0	0	0	0	0			0	0	0	0	0	0	-0.523	0	0
PHF1	0	0	-0.06	0	0	0	0	0	0.012			0	0	0	0	0	0	0	0	0			0	0	0	0	0	0	0	0	0
PHF23	0	0	0	0	0	0	0	0	0			0	0	0	0	0	0	0	-0.124	0			0	0	0	0	0	0	0	0	0
PHOX2B	0	0	0	0	0	0	0	0	0			0	0	0	0	0	0	0	0	0			0	0	0	0	0	0	0	0	0
PI4KA	0	0	0	0	0	0	-0.063	0.007	0			0	0	-0.217	0	0	0	-0.171	0	0			0	0	0	0	0	0	-0.325	0	0
PICALM	0	0	0	0	0	0	0	0	0			0	0	0	0	0	0	0	0	0			0	0	0	0	0	0	0	0	0
PIK3CA	0	0	0	0	0	0	-0.01	0	0			0	0	0	0	0	0	0	0	0			0	0	0	0	0	0	0	0	0
PIK3CB	-0.029	-0.029	0	0	0	0	0	0.063	0			0	0	0	0.031	0	0	0	0	0			-0.254	0	0	0	0	0	0	0	0
PIK3CD	-0.014	0	0	0	0	0	0.015	0	0			0	0	0	0	0	0	0	0	0			0	0	0	0	0	0	0	0	0
PIK3CG	0	0	0	0	0	0	0	0	0			0.103	0	0.028	0	0	0	0	0	0			0	0	0	0	0	0	0	0	0
PIK3R1	0	0	0	0	0	0.009	0	0.02	0.059			0	0	0	0	0	0	0	0.029	0			0	0	0	0	0	0	0	0	0
PIK3R2	0	0	0	0	0	0	0	0	0			0	0	0	0	0	0	0	0	0			0	0	0	0	0	0	0	0	0
PIM1	0	0	-0.036	0	0.018	0	0	0	0			0	0	-0.058	0	0	0	0	0	0			0.093	0	0	0	0	0	0	0	0
PKM	0	-0.023	0	0	0.107	0	0	0	0			0	0	0	0	0.216	0	0	0	0			0	0	0	0	0	0	0	0	0
PLA2G2A	0	0	0	0	0	0	0.017	0	0			0	0	0	0	0	0	0	0	0			0	0	0	0	0	0	0	0	0
PLA2G5	0	0	0	0	0.001	0	0.015	0	0			0	0	0	0	0	0	0	0	0			0	0	0	0	0	0	0	0	0
PLAG1	0.015	0	0	0	0	0	0	0	0			0	0	0	0	0	0	0	0	0			0	0	0	0	0	0	0	0	0
PLAT	0	0	0	0	0	0	0	0	0			0	0	0	0	0	0	0	0	0			0	0	0	0	0	0	0	0	0
PLCB1	0	0	0	0	0	0	0	0	0			0	0	0	0	0	0	0	0	0			0	0	0	0	0	0.068	0	0	0
PLCB4	0	0	0	-0.01	0	0	0	0	0			0	0	0	0	0	0	0	0	0			0	0	0	0	0	0	0	0	0
PLCG1	-0.005	0	0	0	0	-0.062	0	0	0			-0.185	0	0	0	0	-0.023	0	0	0			-0.162	0	0	0	0	0	0	0	0
PLEKHM2	0	0	0	0	0	0	0.038	0	0			-0.085	0	0	0	0	0	0.053	0	0			0	0	0	0	0	0	0	0	0
PML	0	0	0	0.051	0	0	0	0	0			0	0	0	0.188	0	0	0	0	0			0	0	0	0	0	0	0	0	0
PMS1	0	0	-0.002	0	0	0	0	0	-0.022			0	0	0	0	0	0	0	0	-0.023			0	0	0	0	0	0	0	0	0
POFUT1	0	0	0	0	0	0	0	0	0			0	0	0	0	0	0	0	0	0			0	0	0	0	0	0	0	-0.508	0
POLD1	0	0	0	-0.001	0	0	0	0	0			0	0	0	0	0	0.149	0	0	0			0	0	0	0	0	0	0	0	0
POLD4	0	0	0	0	0.028	0	0	-0.006	0			0	0	0	0	0.259	0	0.021	0	0			0	0	0	0	0	0	0	-0.169	0
POLR2H	0	0	0	0	0	0	0	0	0			0	0	0	0	0	0	0	0	0			0	0	0	0	0	0	0	0	0
POM121	0.03	0	-0.036	0	0	0	0	0	0			0	0	0	0	0	0	0	0	0			0.214	0	0	0	0	0.198	0	0	0
POSTN	0	0	0	0.002	0	0	0	0	0			0	0	0	0	0	0	0	0	0			0	0	0	0	0	0	0	0	0
POT1	0	0	0	0	0	-0.106	0	0	0			0	0	0	0	0	-0.243	0	0	0			0	-0.06	0	0	0	-0.49	0	0	0
POU2AF1	0	0	0	0	-0.017	0	0	0	0			0	0	0	0	-0.104	0	0	0	0			0	0	0	0	0	0	0	0	0
POU5F1	0	0	0	0	0	0	0	0	0			0	0	0	0	0	0	0	0	0			0	0	0	0	0	0	0	0	0
PPAP2B	0	0	0	0	0	0	-0.046	0	0			0.052	0	0	0	0	0	0	0	0			0	0	0	0	0	0	0	0	0
PPARGC1A	0	0	0	0	0.004	0	0	0	0			0	0	0	0	0	0	0.009	0	0			0	0	0	0	0	0	0	0	0
PPFIA2	0	0.015	0.029	0	0	0	0	0	0			0	0	0	0	-0.115	0	0	-0.029	0			0	0	0	0	0	0	0	0	0
PPFIBP1	0	0	0	0	-0.022	-0.006	0	0	0			0	0	0	0	0	-0.145	0	0	0			-0.052	0	0	0	0	0	0	0	0
PPM1D	0	0	0	0.018	0	0	0	0	0			0	0	0	0	0	0	0	0	0			0	0	0	0	0	0	-0.295	0	0
PPP1CB	0	0	0	0	0	0	0	0	0			0	0	0	0	0	0	0	0	0			0	0	0	0	0	0	0	0	0
PPP1R13L	-0.031	0	0	0	0	0	0	0	0			0	0	0.025	0.001	0.049	0	0	0.111	0			0	0	0	0	0.131	0	0	0	0
PPP2CB	0	0	0	0.02	0	0	0.062	0	0			0	0	0	0	0	0	0.05	0	0			0	0	0	0.154	0	0	0.596	0	0
PPP2R1A	0	0	0	0	0	0	0	0	0			0.032	0	0	0	0	0	0	0	0			0	0	0	0	-0.459	0	0	0	0
PPP2R4	-0.003	0	-0.076	0	0	0	-0.086	0	-0.028			0	0	-0.294	0	0	0	0	0.057	0			0	0	-1.025	0	0	0	0	0	0
PPP3CA	0	0	0	0	0	0	0	0	0			0	0	0	0	0	0	0	0	0			0	0	0	0	0	0	0	0	0
PPP3CB	0	0	0	0	0	0	0	0	0			0	0	0	0	0	0	0	0	0			0	0	0	0	0	0	0	0	0
PPP3CC	0	0	0	0	0	0	0	0	0			0	0	0	0	0	0	0	0	0			0	0	0	0	0	0	0	0	0
PPP3R1	0	0.018	0	0	0	0	0	0	-0.03			0	0	0	0	0	0	0	0	0			0	0	0	0	0	0	0	0	-0.213
PPP3R2	0	0	0	0	0	-0.006	0	0	0			0	-0.119	0	0	0	0	0	0	-0.099			0	0	0	0	0	0	0	0	0
PQLC3	-0.021	0	0	0	0	0	0	0	0			0	0	0	0	0	0	0	0	0			0	0	0	0	0	0	0	0	0
PRCC	0	0	0	0	0	0	0	0	0			0	0	0	0	0	0	0	0	0			0	0	0	0	0	0	0	0	0
PRKACA	0	0	0	0	0	0	0	0	0			0	0	0	0	0	0	0	0	0			0	0	0	0	0	0	0	0.203	0
PRKACG	0	0	0	0	0	0	0	0	0			0	0	0	0	0	0	0	0	0			0	0	0	0	0	0	0	0	0
PRKCB	0	0	0	0	0	0	0	-0.002	0			0	0	0	0	0	0	0	0	0			0.1	0	0	0	0	0	0	0	0
PRKCD	0	0	0	0	-0.02	0	0	0.014	0			0	0	0.098	0	0	0	0	0	0			0	0	0	0	0	0	0	0	0
PRKG2	0	0.074	0	-0.035	0	0	0	0	0			0	0	0	0	0	0	0	0	0			0	0.34	0	0	0	0	0	0	0
PRMT1	0	0	0	0	0	0	0	0.025	0			0	0	0	0	0	0	0	0	0			0	0	0	0	0	0	0	0	0
PRMT8	0	0	0	0	0	0	0	0	0			0	0	0	0	0	0	0	0	0			0	0	0	0	0	0	0	0	0
PRRX1	0	0	0	0	0	-0.008	0	0	0			0	0.049	0	0	0	0	0	0	0			0	0	0	0	0	0	0	0	0
PRRX2	0	0	0	0	0	0	0	0	0			0	0	0	0	0	0	0	0	0			0	0	0	0	0	0	0	0	0
PRSS8	0	0	0	0	0	0	0	0	0			0	0.087	0	0	0	0	0	0	0			0	0	0	0	0	0	0	0	0
PSEN1	0	0	0	0	0	0	0	0.006	0			0	0	0	0	0	0	0	0	0			0	0	0	0	0	0	0	0	0
PSMD2	0	0	0	0	-0.026	0	0	0	0			0	0	0	0	0	0	0	0	0			0	0	0	0	0	0	0	0	0
PTGS2	0	0	0	0	0	-0.018	-0.033	0.018	0			0	0	0	0	0	0	-0.228	0	0			0	0	0	0	0	-0.178	0	0	0
PTK2B	-0.008	0	0	0	0	0.017	0	-0.021	0			-0.192	0	0	0	0	0	0	-0.066	0			-0.183	0	0	0	0	0	0	0	0
PTK2	0	0	0	0.025	0	0	0	0	0			0	0	-0.049	0	0	0	-0.163	-0.131	0			0	0	0	0	0	0	0	0	0
PTK7	0	0	0	0	0	0	0	0	0			0	0	0	0	-0.151	0	0	0	0			0	0	0	0	0	0	0	0	0
PTPN2	0	0	0	0	0	0	0	0	0.028			0	0	0	0	0	0	0	0	0			0	0	0	0	0	0	0	0	0.245
PTPRA	0	0	0	0	0	0	0	0	0			0	0	0	0	0	0	0	0	0			0	0.19	0	0	0	0	0	0	0
PTPRK	0	0.019	0	0	0	0	0	0	0			0	0	0	0	-0.137	0	0	0	0			0	0	0	0	0	0	0	0	0
PTPRO	-0.002	0	0	0	0	0	0	0.013	0			0	0	0	0	0	0	0	0	0			0	0	0	0	0	0	0.497	0	0
PTPRR	0	0	0	0	0	0	0	0	0			0	0	0	0	0	0	0	0	0			0	0	0	0	0	0	0	0	0
PTTG1	0	0	-0.039	0	0	0	0	0	0			0	0	-0.156	0	0	0	0	0	0			0	0	0	0	0	0	0	0	0
PVT1	0	0	0	0	0	0	0.058	0	0			0	0	0	0	0	0	0	0.055	0			0	0	0	0	0	0	0	0	0
RABEP1	0	0	0	0	0	0	0	0	0			0	0	0	0	0	0	0	0	0			0	0	0	0	0	0	0	0	0
RAC3	0	0	0	0	-0.091	0.01	0	0.003	0			0	0	0	0	0	0	0	0.073	0			0	0	0	0	0	0	0	0	0
RAD21	0	0	0	0	0	0	0	0	0			0	0	0	0	0	0	0	0	0			0	0	0	0	0	0	0	0	0
RAD50	0	0	0	0	0	-0.001	0	0	0			0	0	0	0	0	0	0	0	0			0	0	0	0	0	0	0	0	0
RAD51C	0	0	0	0	0	0	0	0	0			0	0.095	0	0	0	0	0	0	0			0	0	0	0	0	0	0	0	0
RAD51B	0	0	0.006	0	0	-0.037	0	0	0			0	0	0	0	-0.151	-0.074	0	0	0			0	0	0.366	0	-0.467	0	0	0	0
RAD51D	0	0	0	0	0	0	0	0	0			0	0	0.025	0	0	0.003	0.314	0.001	0			0	0	0	0	0	0	0	0.202	0
RAD51	0	0	0.001	0	0	0	0	0	0			0	0	0	0	0	0	0	0	0			0	0	0.505	0	0	0	0.355	0	0
RAF1	0	0	0	0	0	0	-0.031	0	0			0	0	0	0	0	0	-0.076	0	0			0	0	0	0	0	0	-0.256	0	0
RANBP17	0	0	0	0	0	0	0	0	0			0	0	0	0	0	0	0	0	0			0	0	0	0	0.272	0	0	0	0
RANBP2	0	0	0	0	0	0	0	0	0			0	0	0	0	0	0	0	0	-0.076			0	0	0	0	0	0	0	0	-0.01
RAP1GDS1	0	0	0	-0.056	0	0	0	0	0			0	0	0	0	0	0	0	0	0			0	0	0	0	0	0	0	0	0
RARA	-0.006	0	0	0	0	0	0	0	0			0	0	0	0	0	0	0	0	0			0	0	0	0	0	0	0	0	0
RASAL1	0	0	0	-0.028	-0.041	0	0	0	0			0	0	0	-0.186	-0.15	0	0	0	0			0	0	-0.25	0	0	0	0	0	0
RASGEF1A	-0.007	0	0	0	0	0	0	0	0			0	0	0	0	0	0	0	0	0			-0.22	0	0	0	0	0	0	0	0
RASGRP1	0	0	0.035	0.035	-0.006	0	0	0.005	0			0	0	0	0	0	0	0	0	0			0	0	0	0	-0.13	0	0	0	0
RB1	-0.002	0	0	0	0	0	0	0	0			0	0	0	0	0	0	0	0	0			0	0	0	0	0	0	0	0	0
RBM15	0	0	0	0	0	0	0	0.021	0.006			0	0	0	0	0	0	0	0	0			0	0	0	0	0	0	0	0	0
RCOR1	0	0	0	0	0	0	0	0	0			0	0	0	0	0	0	0	0	0			0	0	0	0	0	0	0	0	0
REEP3	0	0	0	0	0	0	0	0	0			0	0	0	0	0	0	0	0	0			0	0	0	0	0	0	0	0	0
RELA	0	0	0	0	0	0	0	0	0			0	0	0	0	0	0	0	0	0			0	0	0	0	0	0	0	0	0
RELN	0	0	0	0	0	0	0	0	0			0	0	0	0	0	0	0	0	0			0	0	0	0	0	0	0	0	0
RERG	-0.002	0	0	0	0	0	0	0	0			0	0	0	0	0	0	0.246	0	0			0	0	0	0	0	0	0.465	0	0
RET	0	0	0	0.004	0	0.011	0	0.028	0			0	0.086	0.171	0	0	0	0	0	0			0	0	0.076	0	0	0	0	0	0
RGS7	0	0	0	0	0	0	-0.048	0	0			0	0	0	0	0	0	0	0	0			0.289	0	0	0	0	0	0	0	0
RHOA	0	0	0	0.059	0	0	0	0	0			0	0	0	0	0	0	0	0	0			0.308	0	0	0	0	0	0	0	0
RHOD	0	0.027	0	-0.03	0	0	0	-0.052	0			0	0	0	0	0.079	0	0	0	0			0	0	0.331	0	0	0	0	0	0
RHOH	0	0	0	0	0	0	0	0	0.016			-0.033	0	0	0	-0.063	0	0	0	0			0	0	0	0	0	0	0	0	0
RICTOR	0	0	0	0	0.062	0	0	0	0			0	0	0	0	0	0	0	0	0			0	0	0	0	0	0	0	0	0.165
RLTPR	0	0	0	0	0	0	0	0	0			0	0	0	0	0	0	0	0	0			0	0	0	0	0	0	0	0.007	0.34
RNF213	0	0	0	0.017	-0.1	0	0	-0.099	0			0	0	0	0	-0.239	0	0	0	0			0	0	0	0.277	0	0	0	-0.249	0
RNF43	0	0	0	0	0	0	0	0	0			0	0	0	0	0	0	0	0	0			0	0	0	0	-0.524	0	0	0	0
ROBO1	0	0	0	0	0	0.015	0	-0.073	0			0	0	0	0	0	0	0	0	0			0.005	0	0	0	0	0	0	-0.25	0.292
ROBO2	0	0	0	0	0	0	0	0	0			0	0	0	0	0	0	0	0	0			0	0	0	0	0	0	0	0	0
ROS1	0	-0.022	0	0	0	0.006	0	-0.003	0			0	-0.177	0	0	0.11	0	0	0	0			-0.051	-0.131	0	0	0	0	0	0	0.14
RPA3	0	-0.024	0	0	0	0	0	0	0			0	-0.146	0	0	0	0	0	0	0			0	0	0	0	0	0	0	0	0
RPL22	0	0	0	0	0	0	0	0	0			0	0	0	0	0	0	0	0	0			0	0	0	0	0	0	0	0	0
RPN1	0	0	0	0.042	0.021	0	0	0	0			0	0	0	0	0.149	0	0	0.096	0.108			0	0	0	0	0	0	0	0	0
RPN2	0	0	0	-0.026	0	0	0	0	0			0	0	0	0	0	0	0	0	0			0	0	0	0	0	0	0	0	0
RPS21	0	0	0	0	0	-0.009	0	0	0			0	0	0	0	0	0	0	0	0			0	0	0	0	0	0	0	0	0
RPS6KA1	0	0	0	0	0.005	0	0	0	0			0	0	0	0	0	0	0	0	-0.104			0	0	0	0	0	0	0	0	0
RPS6KA2	0	0	0	0	0	0	-0.009	0.006	0			0.116	0	0.101	0	0.084	0	0	0	0			0	0	0	0	0	0	0	0	0
RREB1	0	0	0	0	0	-0.022	-0.019	0	0			0	0.028	0	0	0	0	0	0	0			0	0	0	0	0	0	-0.277	0	0
RRM2B	0	0	0	0	0	0	0	0	0			0	0	0	0	0	0	0	0	0			0	0	0	0	0	0	0	0	0
RTN3	0	0	0	0	0	0	0	0	0			0	0	0	0	0	0	0	0	0			0	0	0	0	0	0	0	0	0
RUNX1T1	0.011	0	0	0	0	0	0	0	0			0	0	0	0	0	0	0	0.09	0			0	0	0	0	0	0	0	0	0
RUNX2	0.008	0	-0.01	0	-0.059	-0.011	-0.03	0	0			0	0	-0.169	0	0	0	-0.106	0	0			0	0	0	0	0	0	0	0	0
RYR3	0.011	0	0	0	0.034	0	0	0	0			0	0	0	0	0.036	0	0	0	0			0	0	0	0	0	0	0	0	0
SARNP	0	0	0	0	0	0	0	-0.004	0			0	0	0	0	0	0	0	0	0			0	0	0	0	0	0	0.033	0	0
SCN8A	0	0	0	0	0	0	0	0	0.07			0	0	0.037	0	0	0	0	0	0.148			0	0	0	0	0	0	0	0	0
SDC4	0	0	0	0	0	0	-0.04	0	0			0	0	0	0	0	0	0	0	0			0	0	0	0	0	0	-0.346	-0.076	0
SDHAF2	-0.007	0	0	-0.004	0	0	0	0	0			0	0	0	0	0	0	0	0	0			0	0	0	0	0	0	0	0	0
SDHA	0	0	0	0	0	0	0	0.007	0			-0.108	0	0	0	0	0	0	0	0			-0.082	0	0	0	0	0	0	0	0
SEPT2	0	0	0	0	0	-0.066	0	0	-0.007			0	0	0	0	0	0	0	0	0			0	0	0	0	0	0	0	0	0
SEPT5	0	0	0	0	-0.004	0	0	0	0			0	0	0	0	0	0	0	0	0			0	0	0	0	0	0	0	0	0
SEPT6	-0.031	0	0	0	0	0.021	0.024	0	0			-0.133	0	0	0	0	0	0.075	0	0			0	0	0	0	0	0.375	0	0	0
SEPT9	0	0	0	0	0	0	0	0	0			0	0	0	0	0	0	0	0	0			0	0	0	0	0	0	0	0	0
SERPINE1	0	0	0	0	0	0	0	0	0			0	0	0	0	0	0	0	0	0			0	0	0	0	0	0.145	0	0.157	0
SERPINF1	0	0	0	0	0	0	0	0	0			0	0	0	0	-0.049	0	0	0	0			0	0	0	0	0	0	0	0	0
SETBP1	0	0	0	0	0	0	-0.05	0	0			0	0	0	0	0	0	0	0	0			0	0	0	0	0	0	-0.451	0	0
SETD7	0	0	0	0	0	0	0	0	-0.048			0	0.087	0	0	0	0	0.092	0	0			0	0	0	0	0	0	0	0	-0.323
SET	0	0	-0.009	0	0	0	0	0	0			0	0	0	0	0	0	0	0	0			0.112	0	0	0	0	0	0	0	0
SF3B1	0	0	-0.013	0	0	0	0	0	0			0	0	0	0	-0.128	0	-0.136	0	0			0.122	0	0	0	0	0	-0.266	0	0
SFRP2	0	0	0	0	0	0	0.038	0	0			0	0	0	0	0	0	0.132	0	0			0	0	0.427	0	0	0	0	0	0
SUGP2	0	0	0	-0.006	0	0	0	0	0.001			0	0	0	0	0	0	0	0	0			0	0	0	-0.189	0	0	0	0	0
SRSF2	0	0	0	0	0	0.006	0	0.077	0			0	0	0	0	0	0	0	0.061	0			0	0	0	0	0	0	1.075	0.202	0
SRSF3	0	0	0	0	0	0	0	0	0			0	0	0	0	0	0	0	0	0			0	0	0	0	0	0	0	0	0
SGK1	0	0	0	0	0	0	0	0	0			0.098	0	0	0	0	0	0	0	0			0	0	0	0	0	0	0	0	0
SGPP2	0	0	0	0	0	0	0	0	0			0	0	0	0	0.056	0	0	0	0			0	0	0	0	0	0	0	0	0
SH2D5	0	0	0	0	0	0	0	0	0			0	0	0	0	0	0	0	0	0			0	0	0	0	0	0	0	0	0
SH3BP1	0	0	0	0	0	0	0	0	0			0	0	0	0	0	-0.125	0	0	0			0	0	0	0	0	0	0	0	0
SH3D19	0	0	0	0	0	0	0	0	0			0	0	0	0	0	0	0	0	0			0	0	0	0	0	0	0	0	0
SH3GL2	0	0	0	0	0	0	0	0	0			0	0	0	0	0	0	0	0	0			0	0	0	0	0	0	0	0	0
SHC1	0	0	0.007	0	0	0	0	0	0			0	0	0	0	0	0	0	0	0			0	0	0	0	0	0	0	0	0
SIN3A	0	0	0	0	0	0	0	0	0			0	0	0	0	0	0	0	0	0			0	0	0	0	0	0	0	0	0
SIRT1	0.06	0	0.071	0	0.038	0.006	0	0	0			0	0.041	0	0	0	0	0	0	0			0	0.096	0	0	0	0	0	0	0
SLC1A2	0	0	0	0	0	0	0.001	0	0			0	0	0	0	0	0	0.078	0	0.081			0	0	0	0	0	0	0	0	0
SLC45A3	0	0.006	0.015	-0.048	-0.064	0	0	0	0			0	0	0	0	0	0	0	0.146	0			0	0	0	0	0	0	0	0	0
SLC7A5	0	0	0	0	0	0	0	0	0			0	0	0	0	0	0	0	0	0			0	0	0	0	0	0	0	0	0
SLCO1B3	0	0	0	0	0	-0.004	0	0	-0.018			0	0	0	0	0	-0.067	0	0	0			0	0	0	0	0	0	0	0	0
SMAD4	0	0	0	0	0.044	0	-0.002	0	0			0	0	0	0	0	0	0.062	0	0			0	0	0	-0.495	0	0	0	0	0
SMAD6	0	0	0	0	0	0	0	0	0			0	0	0	0	0	0.117	0.074	0	0			0	0	0	0	0	0	0.135	0	0
SMARCA1	0	0	0	0	0.033	0	0	0	0			0	0	0	0	0	0	0	0	0			0	0	0	0	0	0	0	0	0
SMARCA4	0	0	0	0	0	0	0	0	0			0	0	0	0	0	0	0.024	0	0			0	0	0	0	0	0	0	0	0
SMARCA5	0	0	0	0	-0.027	0	0	0	0			0	0	0	0	0	0	0	0	0			0	0	0	0	0	0	0	0	0
SMARCB1	0	0	0	0	0	0	0	0	0			0	0	0	0	0	0	0	0	0			0	0	0	0	0.18	0	0	0	0
SMC1A	-0.004	0	0	-0.009	0	0	0	0	-0.006			0	0	0	0	0	0	0	0	0			0	0	0	0	0	0	0	0	0
SMC3	0	0	0	0	-0.014	0	0	0	0			0	0	0	0	0	-0.159	-0.049	0	0			0	0	0	0	0	0	0	0	0
SNAPC3	0	0	0.062	-0.005	0	0	-0.01	0	-0.039			0	0	0	0	0	-0.075	0	0	0			0	0	0	0	0	0	0	0	0
SNHG5	0	0	0	0.021	0	0	0	0	0			0	0	0	0	0	0	0	0	0			0	0	0	0.186	0	0	0	0	0
SNW1	0	0	0	0	0.06	0	0	0	0			0	0	0	0	0	0	0	0	0			0	0	0	0	0.319	0	0	0	0
SNX9	0	0	-0.002	0	0	0	0	0	0			0	0	0	0	0	0.152	0	0	0			0	0	0.087	0	0	0	0	0	0
SOCS1	-0.006	0	0	0	0	0	0	0	0			-0.05	0	0	0	0	0	0	0	0			0	-0.106	-0.609	0	0	0	0	0	0
SOCS2	0	0	0	0	0	0	0	0	0			0	0	0	0	0	0	0	0.108	0			0	0	0	0	0	0	0	0.074	0
SORBS2	0	0	0	0	0	0	0	0	0			0	0	0	0	0	0	0	0	0			0	0	0	0	0	0.08	0	0	0
SORT1	0	0	0	0	0	0	0	0	0			0	0	0	0	0	0	0	0	0			0	0	0	0	0	0	0	0	0
SOX11	0	0	-0.021	0	0	0.015	0	0	0			0	0	-0.2	0	0	0	0	0	0			0	0	0	0	0	0	0	-0.008	0
SOX2	0.004	-0.008	0	0	0	-0.015	0	0	0			0	0	0	0	0	0	0	0	0			0	0	0	0	0	-0.115	0	0	0
SP1	0	0	0	-0.032	0	0	0	0	0			0	0	0	0	0	0	0	0	0			0	0	0	0	0	0	0	0	0
SP3	0	0	0	0	0	0	0	-0.021	0			0	0	0	0	-0.028	0	0	-0.192	0			0	0	0	0	0	0	0	0	0
SPOP	0	0	-0.013	0	0	0	0	0.007	0			0	0	0	0	0	0	0	0	0			0	0	0	0	0	0	0	0	0
SPP1	0	0	0	0	0	0	0	0	0			0	0	0	0	0	-0.221	0	0	0			0	0	0	0	0	0	0	0	0
SPRY2	0	0	0	0	0	0.015	0	-0.007	0			0	0	0	0	0	0.169	0	0	0			0	0	0	0	0	0	0	0	0
SPRY4	0	0	0	-0.005	0	0	0	0	0			0	0	0	0	0	0	0	0	0			0	0	0	0	0	0	0	0	0
SPTAN1	0	0	0	-0.001	0	0	0	0	0			0	0	0	0	0	0	0	0	0			0	0	0	-0.111	0	0	0	0	0
SPTBN1	0	0	0	0	-0.002	0	0	0	-0.01			0	0	0	0	0	0	0	0	0			0	0	0	0	0	-0.118	0	0	0
SRC	0	0	-0.002	0	0	0	0	0	0			0	0	-0.124	0	0	0	0	0	0			0	0	0	0	0	0	-0.504	0	0
SRF	0	0	0	0	0	0	-0.008	0	0.023			0	0	0	0	0	0.092	0	0	0			0	0	0	0	0	0	0	0	0
SRGAP3	0	0	0	0	0	0	0	0	0			0	0	0	0	0	0	0	0	0			0	0	0	0	0	0	0	0	0
SRRM3	0	0	0	0	0	0	0	0	0			0	0	0	0	0	0	0	0	0			0	0	0	0	0	0	0	0	0
SS18L1	0	0	0	0	0	0	0.031	0	0			0	0	0	0	0	0	0	0	0			0	0	0	0	0	0	0.136	0	0
SS18	-0.024	0	0	0	0	0	0	0	0			0	0	0.129	0	0	0	0	0	0			-0.356	0	0	0	0	0	0	0	0
SSBP2	0	0	0	0	0	0.007	-0.01	0	0			0	0	0	0	0	0	-0.074	0	0			0	0	0	0	0	0	0	0.202	0
SSX1	0	0	0	0	0	0	0	0	0			0	0	0	0	0	0	0	0	0			-0.013	0	0	0	0	0	0	0	0
SSX2	0	0.016	0	0	0	0	0	0	0			0	0	0	0	0	0	0	0	0			0	0.713	0	0	0	0	0	0	0
SSX4	-0.016	0	0	-0.004	0	0	0	0	-0.024			0	0	0	0	0	0	0	0	0			-0.092	0	0	0	0	0	0	0	0
STAG2	0	0	0	0.036	0	0	0	0	0			0	0	0	0	0	0	0	0	0			0	0	0	0.548	0	0	0	0	0
STAT1	0	0	0	0	0	0	0	0	0			0.081	0	0	0	0	0	0	0	0			0.087	0	0	0	0	0	0	0	0
STAT3	0	0	-0.021	0	-0.075	0	-0.015	0	0			0	0	0	0	0	0	0	0	0			0.125	0	0	0	-0.168	0	0	0	0
STAT4	0	0	0	0	0	0	0	-0.003	0			0	0	0	0	0	0	0	0	0			0	0	0	0	0	-0.097	0	0	0
STAT5A	0	0	0	0	0	0	0	0	0			0	0	0	0	0	0	0	0	0			0	0	0	0	0	0	0	0	0
STAT5B	0	0	0	0.063	0	0	0	0	0			0	0	0	0	0	0	0	0	0			0	0	0	0.167	0	0	0	0	0
STIL	0	0.009	0	0.009	0	0	0	0	0			0	0	0	0	0	0	0	0	0			0	0	-0.066	0	0	0	0	0	0
STK11	0	0.025	0	0	0	0	0	-0.002	0			0	0.021	0	0	0	0	0	0	0			0	0	0	0	0	0	0	0	0
STRN	0	0	0	0	0	0	0	-0.03	0			0	0	0	0	0	0	0	-0.206	0			0	0.176	0	0	0	0	0	-0.251	0
STYK1	0	0	0	-0.036	-0.038	0	0	0	0			0	0	0	0	0	0	0	0.083	-0.046			0	0	0	0	0	0	0	0	0
SUFU	0	0	0	0	0	0	0	0	0			0	0	0	0	0	0	0	0	0			0	0	0	0	0	0	0	0	0
SULF1	0	0	0	0	0	0	0	0	0			0	0	0	0	0	0	0	0	0			0.064	0	0	0	0	0	0	0	0
SUV39H2	0	0	0	0	0	0	0	0	0			0	0	0	0	0	0	0	0	0			0	0	0	0	0	0	0	0	0
SUZ12	0	0	0	0	0	0	0	0	0			0	0	0	0	0	0	0	0	0			0	0	0	0	0	0	0	0	0
SYK	0	-0.011	0	0	0	0	-0.014	0	0			0	0	0	0	0	0	0	0	0			0	0	0	0	0	0	0	0	0
SYP	0	0	-0.041	0.025	0	0	0	0	0			0	0	-0.053	0	0	0	0	0	0			0	0	0	0	0	0	0	0	0
TACC2	0	0	0	0	0	0	0	0	0			0	0	0	0	0	0	0	0	0			0	0	0	0	0	0	0	0	0
TACC3	-0.002	0	0	0	0	0	0	0	0			0	0	0	0	0	0	0.491	0	0			0	0	0	0	0	0	0.463	0	0
TAF15	0	0	0.011	0.031	0	0	0.02	0	0			0	0	0	0	0	0	0	0	0			0	0.337	0	0	0	0	0	0.079	0
TAL1	0	0	0	0	0	0	0	0	0			0	0	0	0	0	0	0	0	0			0	0	0	0	0	0	0	0	0
TAL2	0	0	0	0	-0.029	0.001	0	0	0			0	0	0	0	0	0	0	0	0			0	0.205	0	0	0	0	0	0	0
TCEA1	-0.008	0	0	0	0	0	0	0	0			0	0	0	0	0	0	0	0	0			0	0	0	0	0	0	0.486	0	0
TCF12	0	0	0	0.04	0.019	0	0	-0.022	0			0	0	0	0	0	-0.179	0	0	0			0	0	0	0	0	0	0	0	0
TCF3	0.02	0	-0.021	0	0.003	0	0	0	-0.006			0.078	0	0	0	0	0	0	0.096	0			0	0	0	0	0	0	0	0	0
TCL1A	0	0	0	0	0.03	0	0	0	0			0	0	0	0.048	0.092	0	0	0	0			0	0	0	0	0	0	0	0	0
TCL6	0	0	0	0	0	0	0	0	0			0	0	0	0	0	0	0	0	0			0	-0.058	0	0	0	0	0	0	0
TCTA	0	0	-0.009	0	0	0	0	0	0			0	0	0	0	0	0	0	0	0			0	0	0	0	0	0	0	0	0
TEAD2	0	0.015	0	0	-0.048	-0.01	0	-0.011	0			0	0	0	0	0	0	0	0	0			0	0	0	0	0	0	0	0	0
TEAD3	0	0	0	0	0.011	0	0	0	0			0	0	0	0	0	0	0	0	0			0.117	0	0	0	0	0	0	0	0
TEAD4	0	0	0	0	0	0	0	0	0			0	0	0	0	0	0	0	0	0			0	0	0	0	0	0	0.213	0	0
TEC	0	0	0	0	0	0	0	0	0.014			0	0	0	0	0	0	0	0	0			0	0	0	0	0	0	0	0	0
TERF1	0	0	0	0	0	0	0	0	0			0	0	0	0	0	0	0	0	0			0	0	0	0	0	0	0	0	0
TERF2	0	0	0.007	0.032	0	0	0	0	0			0	-0.056	0	0	0	0	0	0	0			0	0	0	0	0	0	0	0	0
TERT	0	0	0	0	0	0	0	0	0			0	0	0	0	0	0	0	0	0			0	0	0	0	0	0	0	0	0
TFDP1	0	0	0	0	0	0	0	0	0			0	0	0	0	0	0	0	0	0			0	0	0	0	0	0.167	0	0	0
TFEB	0	0	0	0	0.023	0	0.009	0	0			0	0	0	0	0	0	0	0	0			0	0	0	0	0	0	0	0	0.105
TFG	0	0	0	0	0	0	-0.041	0.029	0			0	0	0	0	0	0.063	0	0	0			0	0	0	0	0	0	-0.277	0	0
TFPT	0	0	0	0	0	0	0	0	0			0	0	0	0	0	0	0	0	0			0	0	0	0	0	0	0	-0.381	0
TFRC	0	0	0	0	0	0	0	0	0			0	0	0	0	0	0	0	0	0			0	0	0	0	0	0	0	-0.094	0
TGFB2	0	0	0	0	0	0	0	0	0			0	0	0	0	0	0	0	0	0			0	0	0	0	0	0	0	0	0
TGFB3	0	0	-0.008	0	0	0	-0.042	0	0			0	0	0	0	0	0	0	0	0			0	0	0	0	0	0	0	0.23	0
TGFBI	-0.034	0	0	0	0	0	0	0	0			-0.059	0	0	0	0	0	0	-0.056	0			0	0	0	0	0	0	0	0	0
TGFBR2	0	0	0	0	0	0	0	0	0			0	0	0	0	0	0	0	0	0			0	0	0	0	0	0.097	0	0	0
TGFBR3	0	0	0	0	0	0	0	0	0			0	0	0	0	0	0	0	0	0			0	0.154	0	0	0	-0.073	0	0	0
THADA	0	0	0	0	0	0	0	0.025	-0.001			0	0	0	0	0	0	0	0	0			0	0	0	0	0	0	0	0.112	0
THBS1	0	0	0	0	0	0	0.043	0	0			0	0	0	0	0	0	0.198	0	0			0	0	0	0	0	0	0	-0.185	0
THRAP3	0	0	0	0	0	0	0	0	0			0	0	0	0	0	0	-0.07	0	0			0	0.143	0	0	0	0	0	0	0
TIAM1	0	0	0.044	0	0	0	0	0	0			0	0	0.087	0	0	0	0	0	0			0	0	0	0	0	0	0	0	0
TLR4	0	0	-0.008	0	-0.075	0	0	0	0			0	0	0	0	-0.15	0	0	0	0			0	0	0	0	0	0	0	0	0
TLX1	0	0	0	0	0	0	0	0	0			0	0	0	0	0	0	0	0	0			0	0	0	0	0	0	0	0	0
TLX3	0	0	0	-0.005	0	0	0	0	0			0	0	0	0	0	0	0	-0.077	0			0	0	0	0	0	0	0	0	0
TMEM127	0	0	0	0	0	0	0	0	0			0	0	0	0	0	0	0	0	0			0	0	0	0	0	0	0	0	0
TMEM30A	0	0	0	0.008	-0.021	-0.019	0	0	0			0	0	0	0	-0.026	0	0	0	0			0	0	0	0	0	-0.085	0	0	0
TNC	0	0	0	0	0	0	0	0	0			0	0	0	0	0	0	0	0	0			0	0	0	0	0	0	0	0	0
TNFAIP3	0	0	0	0	0	0	0	0	0.059			0	0	0	0	0	0	0	0	0			0	0	0	0	-0.145	-0.034	0	0	0.082
TNFRSF10B	0	0	0	0	0	0	0	0	0			0	0	0	0	0	0	0	0	0			0	0	0	0	0	0	0	0	0
TNFRSF10D	-0.045	0	0	0	0	0	0	0.04	0			-0.201	0	0	0	0	0	0	0	0			0	0	0	0	0	0	0	0.391	0
TNFRSF17	0.022	0	0	0	0	0	0	0	0			0	0	0	0	0	0	0	0	0			0	0.146	0	0	0	0	0	0	0
TNF	0	0	0	0	-0.002	-0.016	0	0.042	0			0	0	0	0	0	0	0.274	0	0			0	0	0	0	0	0	0	0	0
TOP1	0	0	0	0	0	0	0	0	0			0	0	0	0	0	0	0	0	0			0	0	0	0	0	0	0	0	0
TOP2A	0	0	0	0	-0.087	-0.047	0	0	0			0	0	0	0	0	-0.112	0	0	0			0	0	0	0	-0.42	0	0	0	0
TOP2B	-0.008	0	0	0	0.093	-0.024	0	0	0			0	0	0	0	0	0	0	-0.039	0			-0.122	0	-0.029	0	0.521	0	0	0	0
TP53BP1	0	0	0	0	0	0	0	0	0			0	0	0	0	0	0	0	0	0			0	0	0	0	0	0	0	0	0
TP73	-0.014	0	0	0	0	0	0	0	0			0	0	0	0	0	0	0	0	0			0	0	0	0	0	0.334	0	0	0
TPM4	0	-0.015	0	0	0	0.043	0	0	-0.008			0	-0.131	0	0	0	0	0	0	0			0	0	0	0	0	0	0	0	0
TPO	0	0	0	0	-0.005	0	0	0	0			0	0	0	0	0	0	0	0	0			0	0	0	0	0	0	0	0	0
TPR	0	0	0	0	0	0	0	0	-0.019			0.073	0	0	0	0	0	0	0	0			0	0	0	0	0	0	0	0	0
TRAF3	0	0	0	0	0	0	0	0	0			0	0	0	0	0	0	0	0.061	0			0	0	0	0	0	0	0	0	0
TRAF5	0	0	0	0	-0.015	0	0	0	0			0	0	0	0	-0.137	0	0	0	0			0	0	0.337	0	0	0	0	0	0
TRHDE	0	0	0.026	0	0	0	-0.057	0	0			0	0	0	0	0	0	0	0	0			0	0	0	0	0	0	0	0	0
TRIM27	0	0	0	0	0	0.054	0	0	0			0	0	0	0	0	0.079	0	0	0			0	0	0	0	0	0.164	0	0	0
TRIM33	0	0	0.032	0	0	0	0	-0.04	-0.047			0	0	0	0	0	0	0	-0.129	0			0	0	0	0	0	0	0	0	0
TRIP11	0	0	0	0	0	0	0	0	0			0	0	0	0	0	0	0	0	0			0	0	0	0	0	0	0	0	0
TRPS1	0	0	0.03	0	0	0	-0.003	-0.004	0			0	0	0	0	0	0	0	0	0			0	0	0	0	0	0	0	0	0
TSC1	0	0	0	0	0	0.001	0	0	0			0	-0.143	0	0	0	0	0	0	0			0	-0.091	0	0	0	0	0	0.055	0
TSHR	0	0	0	0	0	0	0	0	0			0	0	0	0	0	0	0	0	0			0	0	0	0	0	0	0	0	0
TTK	-0.014	0	0	0	0	0	0	0	0			0	0	0	0	0	0	0	0	0			0	0	0	0	0	0	0	0.1	0
TTL	0	0	0	-0.006	-0.064	0	0.036	0	0			0	0	0	0	0	0	0	0	0			0	0	0	0	0	0	0	0.244	0
U2AF2	0	0	0	0	0	0	0	0	0			0	0	0	0	0	0	0	0	0			0	0	0	0	0	0	0	0	0
UBE2B	0	0	0	0	0	0	0	0	0			0	0	0	0	0	0	0	0	0			0	0	0	0	0	0	0	0	0
UBE2C	0.008	0	0	0	-0.034	0	-0.05	-0.016	0			0	0	0	0	0	0	-0.084	-0.122	0			0	0	0	0	0	0.297	0	0	0
USP16	0	0	0	0	0	0	0	0	0			0	0	0	0	0	0	0	0	0			0	0	0	0	0	0	0	0	0
USP42	0	0	0	0	0.078	0	0	0	0			0	0	0	0	0	0	0	0	0			0	0	0	0	0	0	0	0	0
USP5	0	0	0	0	0	0	0	0	0			0	0	0	0	0	0	0	0	0			0	0	0	0	0	0	0	0	0
USP7	0	0	0	0	0	0	0	0	0			0	0	0	0	0	0	0	0	0			0	0	0	0	0	0	0	0	0
VCAM1	-0.01	0	0	0	0	0	0	0	0			0	0.025	0	0	0	0	0.06	0.15	0			0	0	0	0	0	0	0	0	0
VEGFA	0	0.002	-0.034	-0.021	0	-0.012	0	0	0			0	0	0	0	0	0	0	0	0			0	0	0.069	0	0	0	0	0	-0.22
VEGFC	0	0	0	0	0	0	0	0	0			0	0	0	0	0	0	0	0	0			0	0	0	0	0	0	0	0	0
VHL	0	0.002	0	0	0	0	0	0	0			0	0	0	0	0	0	0	0	0			0	0	0	0	0	0	0	0	0
VTI1A	0	0	0	0	0	0	0	0	0			0	0	0	0	0	0	0	0	0			0	0	0	0	0	0	0	0	0
WASF2	0	0	0.002	0	0	0	-0.012	0	0			0	0	0	0	0	0	-0.112	0	0			0	0	0	0	0	0	0	0	0
WDFY3	0	0	-0.015	0	0	0	0.061	0	0			0	0	0	0	0	0	0	0	0			0	0	0	0	0	0	0	0	0
WDR18	0	0	0	0	0	0.014	0	-0.045	0			0	0	0	0	0	0.075	0	0	0			0	0.356	0.103	0	0	0	0.176	-0.37	0
WDR1	0	0	0	0	-0.037	0	0	0	0			0	0	0	0	0	0	0	0	0			0	0	0	0	0	0	0	0	0
WDR70	0	0	0	0	0	0	0	0	0			0	0	0	0	0	0	0	0	0			0.126	0	0	0	0	0	0	0	0
WEE1	0	0	0	0	0	0	0	0	0			0	0	0.135	0	0	0	0	0	0			0	0	-0.058	0	0	0	0	0	0
WHSC1L1	0	0	0	0	0	0	0	0	0			0	0.041	0	0	0	0	0	0	0			0	0	0	0	0	0.207	0	0	0
WHSC1	-0.012	0	0	0	0	0	0	0	0			0	0	0	0	0	0	0	0	0			0	0	0	0	0	0	0	0	0
WIF1	0	0	0	0	0	0	0	0	0			0	0	0	0	0	0	0	0	0			0	0	0	0.198	0	0	0	0	0
WISP3	0	0	0	0	0	0.001	0.002	0	0			0	0	0	0	0	0	0	0	0			0	0	0	0	0	0	0	0	0
WNT10A	0	0	0	0	0	0	0.024	0	0			0	0	0	0	0	0	0	0	0			0	0	0	0	0	0	0	0	0
WNT11	0	0	0	0	0	-0.012	0	0	0			0	0	0	0	0	0	0.041	0	0			0	0	0	0.052	0	0	0	0	0
WNT16	0	0	0	0	0	0	-0.04	0	0			0	0	0	0	0	0	-0.168	0	0			0	0	0	0	0	0	0	0	0
WNT2B	-0.005	0	0	0	0	0	0	0	0			0	0	0	0	0	0	0	0	0			0	0	0	0	-0.338	0	0	0	0
WNT3	0	0	0	0	-0.017	0	0	0	0			0	0	0	0	0	0	0	0	0			0	0	0	0	0	0	0	-0.258	0
WNT4	0	0	0	0	0.005	0	0	0	0			0	0	0	0	0	0	0	0	0			0	0	0	0	0	0	0	0	0
WNT5B	0	0	0	0	0	0	0	0	0			0	0	0	0	0	0.122	0	0	0			0	0	0	0	0	0	0	0	0
WNT6	0	0	0	0	0	-0.039	0	0	0			0	-0.087	-0.208	0	0	-0.119	-0.071	-0.039	0			0	0	0	0	0.49	-0.15	0	0	0
WNT7B	0	0	0	0	0	0	0.021	0	0			0	0	0	0	0	0	0.115	0	0			0	0	0	0	0	0	0	0	0
WNT8B	0	0	0	0	0	0	0	0	-0.024			0	0	0	0	0	0	0	0	0			0	0	0	0	0	0	0	0	0
WRN	0	0	0	0	0.014	0	0	0	0			0	0	0	0	0	0	0	0	0			0	0	0	0	0	0	0	0	0
WSB1	0	0	0	0	0	0	0	0	0			0	0	0	0	0	0	0	0	0			0	0	0	0	0	0	0	0	0
WT1	0	0	0	0.005	0	0.031	0	0	0			0	0	0	0	0	0	0	0	0			0	0	0	0	0	0	0	0	0
WWOX	0	-0.02	0	0	-0.017	0	0	0	0			0	-0.062	0	0	-0.153	0	0	0	0			0.036	-0.277	0	0	0	0	0	0	0
WWTR1	0	0	0	0	0	0	0	0	0			0	0	0	0	0	0	0	0	0			0	0	0	0	0	0	0	0	0
XBP1	0	0	0	0	0	0	0	0	0			0	0	0	0	0	0	0	0	0			0	0	0	0	0	0	0	0	0
XIAP	0	0	0	0	0	0.016	0	0	0			0	0	0	0	0	0	0	0	0			0	0	0	0	0	0	0	0	0
XKR3	0	0	-0.064	0	0	0	0	0	0			0	0	0	0	0	0	0	0	0			0	0	-0.405	0	0	0	0	0	0
XPA	0	0	0	0	0	0	0	0	0			0	0	0	0	0	0	0	0	0			0	0	0	0	0	0	0	0	0
XPC	0	0	0	0	0	-0.005	-0.045	-0.1	0			0	0	0	0	0	0	0	-0.134	0			0	0	0	0	0	0	0	-0.514	0
YAP1	0	0	0	0	0	0	0	0	0.018			0	0	0	0	0	0	0	0	0			0	0	0	0	0	0	0	0	0
YPEL5	0	0	0	0	0	0	0	0	0			0	0	0	0	0	0	0	0	0			0	0	0	0	0	0	0	0.632	0
YTHDF2	0	0	0	0	0	0	0	0	0			0	0	0	0	0	0	0	0	0			0	-0.067	0	0	0	0	0	0	0
YY1AP1	0	0	0	0	0	0	0	0	0			0	0	0	0	0	0	0	0	0			0	0.188	0	0	0	0	0	0	0
ZFP64	0	0	0	0	0	0	0	0	0			-0.125	0	0	0	0	0	0	0	0			0	0	0	0	0	0	0	0	0
ZFPM2	0	0	0	0	0	0	0	0	0			0	0	0	0	0	0	0	0	0			0	0	0	0	0	0	0.726	0	0
ZFYVE19	0	0	0	0	0	0	0	0	0			0	0	0	0	0	0	0	0	0			0	-0.214	0	0	0	0	-0.259	0	0
ZMIZ1	0	0	-0.001	0	-0.028	0	0	0	0			0	0	0	0	0	0	0	0	0			0	0	0	0	0	0	0	0	0
ZMYM2	0	0	0	0	0	0	0	0	0			0	0	0	0	0	-0.129	0	0	0			0	0	0	0	0	-0.367	0	0	0
ZMYM3	0	0	0	0	0	0	0	0	0			0	0	0	0	0	0	0	0	0			0	0	0	0	0	0	0	0	0
ZMYND11	0	0	0	0	0	0	0	0	0			0	0	0	0	0	0	0	0	0			0	0	0	0	0	0	0	0	0
ZNF207	0	0	0	0	0	0	0	0	0			0	0.151	0	0	0	0	0	0	0			0	0	0	0	0	0	0	0	0
ZNF217	0	0	0	0	0	0	0	0.032	0			0	0	0	0	0	0	0	0	0			0	0	0	0	0	0	0	0	0
ZNF24	0	0	0	0	0	0	-0.026	0	0			0	0	0	0	0	0	0	0	0			0	0	0	0	0	0	0	-0.48	0
ZNF444	0	0	0	0	0	0	0	0	0			0	0	0	0	0	0	0	0	0			0	0	0	0	0	0	0	0	0
ZNF521	0	0	0	0	0	0	0	0	0			0	0	0	0	0	0	0	0	0			0	0	0	0	0	0	0	0	0
ZNF687	0.008	0	0	0	0	0	0	0	0			0.08	0	0	0	0	0	0	0	0			0	0	0	0	0	0	0	0	0
ZNF703	0	0	0	0	0	0	0	0	0			0	0	0	0	0	0	0	0	0			0	0	0	0	0	0	0	0	0
ZRSR2	-0.025	0	0	0.004	0	0	0	0	0			0	0	0.049	0	0	0	0	0	0			0	0	0	0	0	0	0	0	0

## Sheet: Genelist for marginal model
A1			A2				A3
Gene	Number of the associated cancer types		Gene	Number of the associated cancer types			Gene	Number of the associated cancer types
APH1A	9		APH1A	9			LAMA1	8
ETV6	8		CXCR4	8			IGF1	7
MAPK1	8		MAPK1	8			NAPA	7
MDS2	8		ACVR2A	7			TCTA	7
AKT2	7		ARID1A	7			TNFRSF10D	7
ATIC	7		ATIC	7			AIP	6
AXIN1	7		AXIN1	7			CSNK2A1	6
IFRD1	7		BCL9	7			ID1	6
PPP3R1	7		CLP1	7			MAP2K4	6
RABEP1	7		DOT1L	7			PIK3R1	6
SLC1A2	7		E2F1	7			PRKG2	6
ARID1A	6		ETV4	7			SERPINE1	6
CCL2	6		ETV6	7			TP53BP1	6
CHIC2	6		FANCI	7			ADM	5
CLTCL1	6		FGF1	7			AKT3	5
PPP2CB	6		FUT1	7			ANKRD28	5
RELN	6		IFRD1	7			ARHGAP26	5
SERPINE1	6		PPP3R1	7			ATIC	5
TNFRSF10D	6		RABEP1	7			BCL11B	5
CLP1	5		TFRC	7			BCL2L2	5
CMKLR1	5		AFF3	6			BCORL1	5
CTRB1	5		AHR	6			BRCA2	5
DOT1L	5		BTG1	6			CD28	5
FGF1	5		MB21D2	6			CDC25C	5
KDSR	5		CASP7	6			COX6C	5
KEAP1	5		CCL2	6			CRLF2	5
PIK3R1	5		CCND3	6			CSNK1G2	5
PLAT	5		CDC25C	6			CTNNA1	5
PPARGC1A	5		CHIC2	6			CTRB1	5
RYR3	5		CLTCL1	6			CYP1B1	5
SEPT2	5		CTRB1	6			DNM1	5
AURKB	4		DNMT3A	6			DTX4	5
BCL11B	4		EED	6			EGR2	5
BCL2L2	4		FOXO4	6			EP300	5
CBFA2T3	4		GNG4	6			EPHA2	5
CCND3	4		HERPUD1	6			FANCD2	5
CDC25C	4		ITGB3	6			FAS	5
CHCHD7	4		KEAP1	6			FLT1	5
CSNK1G2	4		MAP3K1	6			FOXO1	5
FGFR4	4		MEF2B	6			GAS7	5
FOXO1	4		MYD88	6			GATA1	5
FUS	4		OLIG2	6			GOT1	5
FZD3	4		PFDN5	6			GPHN	5
HSPA2	4		PIK3CD	6			HTRA1	5
HTRA1	4		PPARGC1A	6			IGFBP3	5
MAML1	4		PPFIA2	6			IL15	5
PDE4DIP	4		PPP2CB	6			INPP5D	5
PRKG2	4		RELN	6			ITGA7	5
PTPN2	4		SERPINE1	6			KDM2B	5
ROS1	4		SLC1A2	6			KIAA1524	5
SIRT1	4		SMARCB1	6			CCAR2	5
SPRY2	4		TLX1	6			LASP1	5
TFRC	4		VTI1A	6			LMO2	5
VEGFC	4		ANLN	5			MAML1	5
WWTR1	4		ARNT	5			MDS2	5
AFF3	3		ATL1	5			NCOA2	5
AKT3	3		ATR	5			NCOA3	5
ANKRD28	3		AUTS2	5			NUP107	5
BCAS3	3		BACH1	5			TENM1	5
BCL9	3		BCL2L2	5			PCBP1	5
CD28	3		CEP85L	5			PDE4DIP	5
COL1A2	3		CBL	5			PHF1	5
COX6C	3		CMKLR1	5			PPP3CC	5
CRLF2	3		CPNE1	5			RABEP1	5
DGKZ	3		CSF1R	5			RANBP17	5
DKK1	3		CSNK1G2	5			RAP1GDS1	5
DNM1	3		ERCC6	5			RERG	5
E2F1	3		FANCL	5			RET	5
ELF4	3		FGF9	5			SIRT1	5
ERG	3		FGFR4	5			SLC1A2	5
ETS2	3		FOXO1	5			SNAPC3	5
FGFR1OP2	3		FOXO3	5			TAF15	5
FOXO4	3		FUS	5			TAL2	5
GPC3	3		FZD3	5			TCF3	5
GPR34	3		GOPC	5			TFRC	5
HRAS	3		HES1	5			TNFAIP3	5
IDH2	3		HTRA1	5			TRIM33	5
ITGA7	3		INPP5D	5			VEGFC	5
KDM4C	3		KDM4C	5			AMH	4
LEFTY2	3		KDSR	5			ANLN	4
LMO2	3		KPNB1	5			ARHGAP20	4
MAD2L1	3		LAMP2	5			ARIH2	4
MAPK8	3		LRPPRC	5			AURKB	4
MGMT	3		MALT1	5			AUTS2	4
MYB	3		MAML1	5			AXIN1	4
NUP107	3		MAML2	5			BCL2A1	4
PHF1	3		MAP3K6	5			BLM	4
PHF23	3		MGMT	5			BRIP1	4
PIK3CD	3		CENPU	5			BUB1B	4
PPFIBP1	3		MLH1	5			GID4	4
PPP3CC	3		MYB	5			CAMK2B	4
PTPRA	3		NFKBIA	5			CBLB	4
RET	3		NPM1	5			CCL2	4
SHC1	3		PAK6	5			CDH1	4
STAG2	3		PAX3	5			CDK9	4
TCF3	3		PDE4DIP	5			CDKN2D	4
VTI1A	3		PIK3R1	5			CEBPA	4
ZNF207	3		PLA2G2A	5			CEBPD	4
ACVR2A	2		PLAT	5			CEP57	4
AHR	2		POM121	5			CHCHD7	4
AKAP6	2		PPP1CB	5			CHIC2	4
AMH	2		RET	5			CMKLR1	4
ATL1	2		RHOA	5			COL6A3	4
AUTS2	2		RHOH	5			CSF3R	4
BCL2A1	2		SEPT2	5			DKK1	4
BCL2L1	2		SGK1	5			DLL4	4
GID4	2		SH2D5	5			EBF1	4
CAMK2B	2		SIRT1	5			ELN	4
CASP7	2		SPRY2	5			ERBB2	4
CD58	2		SYP	5			ERBB3	4
CDC42	2		TGFBR2	5			ERC1	4
CIRH1A	2		USP5	5			ETV1	4
CRKL	2		VEGFC	5			ETV5	4
CSNK2A1	2		WDR18	5			EZH2	4
CTCF	2		WDR70	5			FAM127C	4
DTX4	2		YY1AP1	5			FANCC	4
DUSP26	2		ZNF207	5			FASLG	4
EPS15	2		ZNF444	5			FBXW7	4
ERBB3	2		AMH	4			FEV	4
ERCC1	2		ANKRD28	4			FGF19	4
ERCC6	2		ATF3	4			FGF9	4
ETV4	2		ATP8A2	4			FGFR1OP	4
EXT2	2		AURKB	4			FOSB	4
EYA1	2		BRWD3	4			FOXL2	4
FAF1	2		CD58	4			FRK	4
FAM127C	2		CHCHD7	4			FRMPD4	4
FBXW7	2		COL11A1	4			FRYL	4
FGF4	2		COMMD1	4			FZD3	4
FGF6	2		COX6C	4			GNAQ	4
FGF9	2		CRKL	4			GNG4	4
FLT3	2		CRLF2	4			GOSR1	4
FOXO3	2		CTCF	4			GPR34	4
FUT1	2		CYP2C19	4			GRM3	4
FZD8	2		DMRT1	4			H3F3A	4
GAS1	2		DST	4			HLF	4
GHR	2		EPOR	4			HOXA11	4
GNG4	2		EPS15	4			HOXA13	4
GOLGA5	2		ERCC1	4			HRAS	4
GOSR1	2		ETS2	4			HSPA2	4
GOT1	2		EXT2	4			ID4	4
IFNG	2		EYA2	4			IDH2	4
IGF1	2		FAM127C	4			IFNG	4
IKZF3	2		FANCE	4			INPP4A	4
IL15	2		FBN2	4			IRF1	4
IRS4	2		FGF13	4			ITGA5	4
ITGA5	2		GNAI1	4			JAK3	4
ITGB3	2		GOT1	4			KDR	4
KAT2B	2		H3F3A	4			KIAA0232	4
KDM2B	2		HNRNPA2B1	4			KLHL6	4
KDM5C	2		HSPA1A	4			LAMA5	4
LAMA1	2		IFNG	4			LGALS3	4
LAMP2	2		IL13	4			LHFP	4
MAML2	2		IRS4	4			LRIG3	4
MAP2	2		LGALS3	4			MAD2L1	4
MBTD1	2		MRE11A	4			MAGED1	4
MEF2C	2		NEDD4	4			MAGEE1	4
CENPU	2		NF1	4			MATK	4
MLH1	2		NFKB2	4			MKI67	4
MRE11A	2		NR4A3	4			CENPU	4
MUTYH	2		NUP93	4			MLF1	4
NCOR2	2		PCNA	4			MRE11A	4
NF1	2		PDGFB	4			MYB	4
NPM1	2		PER1	4			NAB2	4
NUMA1	2		PIK3R2	4			NCOA4	4
TENM1	2		PRKACG	4			NFIB	4
OLIG1	2		PRKG2	4			NFKBIA	4
PAK6	2		PTK7	4			NOD1	4
PAX3	2		PTPRO	4			NR3C1	4
PCM1	2		RAC3	4			NT5C2	4
PCNA	2		RAD51	4			NUMA1	4
PDGFB	2		ROS1	4			PAFAH1B2	4
PER1	2		SERPINF1	4			PAPPA	4
PIK3CB	2		SHC1	4			PAX8	4
PLA2G2A	2		SS18L1	4			PEG3	4
PML	2		STAT5A	4			PHF23	4
POLD4	2		SUFU	4			PIK3CA	4
PPFIA2	2		TAL2	4			PLA2G5	4
PPP1CB	2		TFPT	4			PMS1	4
PPP3R2	2		TMEM127	4			POFUT1	4
PRCC	2		TPM4	4			PPARGC1A	4
PTK2B	2		WNT10A	4			PPFIBP1	4
PTK7	2		XIAP	4			PPP2R4	4
PTPRO	2		ZFPM2	4			PPP3R2	4
RHOA	2		ASXL1	3			PRKACG	4
RHOD	2		BCL2A1	3			PRRX1	4
RHOH	2		BMP4	3			PTTG1	4
SCN8A	2		CBLB	3			RAF1	4
SGK1	2		CD28	3			RASAL1	4
SH3BP1	2		CDK8	3			RNF213	4
SNAPC3	2		CEBPA	3			ROBO1	4
SSBP2	2		CHEK2	3			ROS1	4
SSX1	2		CIC	3			RPS21	4
STYK1	2		CIT	3			RPS6KA2	4
SUZ12	2		COL6A3	3			RUNX2	4
SYP	2		EGR1	3			SARNP	4
TAF15	2		EXOSC6	3			SCN8A	4
TAL2	2		EZH2	3			SEPT2	4
TCF12	2		FAM19A2	3			SHC1	4
TEC	2		FAS	3			SMAD6	4
TERF2	2		FOSB	3			SNW1	4
TGFBR2	2		FZD6	3			SOX2	4
TLX1	2		FZD8	3			SPOP	4
TPM4	2		GHR	3			SPRY2	4
USP5	2		GOSR1	3			SPRY4	4
USP7	2		GRM3	3			SPTAN1	4
WDR18	2		HHEX	3			SRC	4
WNT8B	2		HOXA11	3			SSBP2	4
XIAP	2		HOXA3	3			SSX1	4
ZFPM2	2		IKZF1	3			SSX2	4
ZFYVE19	2		IKZF2	3			STAT5A	4
ZMYM3	2		IKZF3	3			STYK1	4
ZNF444	2		IL2RA	3			SUZ12	4
ABLIM1	1		KIAA0232	3			TCL1A	4
ACSL6	1		LEFTY2	3			TNF	4
AIP	1		LINGO2	3			TOP2B	4
ANLN	1		LRRC7	3			TP73	4
ARHGAP26	1		LYL1	3			TPM4	4
ARIH2	1		MAD2L1	3			UBE2C	4
ARNT	1		MEF2C	3			VEGFA	4
AR	1		MELK	3			WDFY3	4
ASXL1	1		MSN	3			WDR70	4
ATP8A2	1		NCOR2	3			WHSC1L1	4
ATR	1		TENM1	3			WNT5B	4
BACH1	1		PKM	3			WNT6	4
BHLHE22	1		POSTN	3			WWTR1	4
BLM	1		PPFIBP1	3			XIAP	4
BMP4	1		RAD21	3			XPC	4
BRCA2	1		RAP1GDS1	3			YAP1	4
BRWD3	1		RPN1	3			YY1AP1	4
BTG1	1		SARNP	3			ZRSR2	4
NUTM1	1		SRSF3	3			ABLIM1	3
MB21D2	1		SNHG5	3			ACVR2A	3
CEP85L	1		SPTBN1	3			ADD3	3
CBFB	1		SRGAP3	3			AFF3	3
CBLB	1		STAG2	3			AFF4	3
CBL	1		STAT5B	3			AHI1	3
CCDC28A	1		TERF2	3			AHR	3
CCK	1		TIAM1	3			AKAP6	3
CCNE1	1		TOP2B	3			AKT1	3
CD19	1		WNT2B	3			AKT2	3
CD44	1		ZFP64	3			APH1A	3
CD79B	1		ZFYVE19	3			APOD	3
CDC14A	1		BLM	2			ARID2	3
CDC14B	1		CD44	2			ASMTL	3
CDH11	1		CEP57	2			ATL1	3
CDK12	1		ERC1	2			ATP1B4	3
CDK1	1		FEV	2			BACH2	3
CDK8	1		GATA1	2			BAP1	3
CEBPA	1		IGFBP2	2			BARD1	3
CEBPD	1		IL1RAP	2			BAZ2A	3
CEP57	1		KAT2B	2			BCL2L1	3
CHEK2	1		KIT	2			BCL7A	3
CHL1	1		LASP1	2			BIRC3	3
CIC	1		LRRC37B	2			BIRC6	3
CIT	1		MET	2			BMP4	3
CKB	1		NIN	2			BRAF	3
COL11A1	1		NUMA1	2			BRSK1	3
COL6A3	1		PML	2			BTG1	3
COMMD1	1		PTK2B	2			BTK	3
CPNE1	1		PVT1	2			BTLA	3
CSF3R	1		RAF1	2			RMI2	3
CTNNA1	1		RRM2B	2			MB21D2	3
CXCR4	1		RUNX1T1	2			CEP85L	3
CYP1B1	1		RUNX2	2			CARS	3
CYP2C19	1		SDHA	2			CBFA2T3	3
DCLK2	1		TCTA	2			CBL	3
DCN	1		ZNF521	2			CCNB1IP1	3
DDR2	1		DLL3	1			CCNG1	3
DGKB	1		FEN1	1			CD19	3
DLL3	1		MSH2	1			CD274	3
DLL4	1		MYC	1			CD36	3
DMRT1	1		NAPA	1			CD58	3
DMRTA2	1		WDFY3	1			CD74	3
DST	1		ABI1	0			CD79B	3
DUSP2	1		ABL2	0			CDC25A	3
EGR1	1		ABLIM1	0			CDC73	3
ELL	1		ACACA	0			CDK6	3
ELN	1		ACSBG1	0			CDKL5	3
ELP2	1		ACSL6	0			CDKN1A	3
EML1	1		ACVR1B	0			CEBPB	3
EPHA2	1		ACVR1C	0			CHST11	3
EPHB6	1		ADD3	0			CHUK	3
EPOR	1		ADM	0			CIRH1A	3
ERC1	1		AFF4	0			CLP1	3
EWSR1	1		AGR3	0			CLTCL1	3
EXOSC6	1		AHI1	0			CNTN1	3
EYA2	1		AIP	0			CPNE1	3
EZH2	1		AK2	0			CXCR4	3
FAM19A2	1		AK5	0			SPECC1	3
FAM46C	1		AKAP6	0			DAXX	3
FANCI	1		AKT1	0			DCLK2	3
FANCL	1		AKT2	0			DCN	3
FAS	1		AKT3	0			DEK	3
FBN2	1		ALDH1A1	0			DGKB	3
FCGR2B	1		ALDH2	0			DGKZ	3
FEN1	1		ALDOC	0			DIRAS3	3
FEV	1		ALK	0			DKK4	3
FGF3	1		ANGPT1	0			DLL1	3
FGF8	1		APC	0			DMRTA2	3
FGFR1OP	1		APOD	0			DNAJB1	3
FHL2	1		ARAF	0			DOT1L	3
FLT3LG	1		ARHGAP20	0			DST	3
FOSB	1		ARHGAP26	0			DUSP26	3
FOS	1		ARHGEF7	0			EDNRB	3
FZD2	1		ARID2	0			ELK4	3
FZD6	1		ARIH2	0			EPHA3	3
GATA1	1		ARRDC4	0			EPS15	3
GBP2	1		AR	0			ERCC1	3
GNAI1	1		ASMTL	0			ERCC6	3
GOPC	1		ATF1	0			ERG	3
GRM3	1		ATG5	0			ETS2	3
H3F3A	1		ATM	0			ETV6	3
HDAC3	1		ATP1B4	0			EXT1	3
HEPH	1		ATRNL1	0			FANCL	3
HERPUD1	1		AURKA	0			FBN2	3
HES1	1		AXL	0			FCGR2B	3
HIPK1	1		BACH2	0			FCRL4	3
HIPK2	1		BAP1	0			FEN1	3
HIST1H2BJ	1		BARD1	0			FGF13	3
HLF	1		DDX39B	0			FGF1	3
HNRNPA2B1	1		BAX	0			FGF4	3
HOXA11	1		BAZ2A	0			FGF6	3
HOXA3	1		BCAS3	0			FGFR1OP2	3
HOXC13	1		BCL10	0			FGFR4	3
HSPA1A	1		BCL11B	0			FIGF	3
HSPA4	1		BCL2L1	0			FLCN	3
HSPA5	1		BCL2	0			FLT3	3
ID4	1		BCL7A	0			FLT4	3
IGFBP2	1		BCORL1	0			FLYWCH1	3
IGFBP3	1		BCR	0			FNBP1	3
IKBKB	1		BHLHE22	0			FUS	3
IKZF1	1		BICC1	0			FZD8	3
IKZF2	1		BIN1	0			GANAB	3
IL13	1		BIRC3	0			GHR	3
IL1RAP	1		BIRC6	0			GLI3	3
IL2RA	1		BRAF	0			GNAI1	3
CXCL8	1		BRCA1	0			GOLGA5	3
INHBA	1		BRCA2	0			GRIN2A	3
INPP4A	1		BRIP1	0			GSK3B	3
INPP5D	1		BRSK1	0			HDAC1	3
IRF1	1		BTG2	0			HEPH	3
ITK	1		BTK	0			HERPUD1	3
JAK1	1		BTLA	0			HES5	3
KIAA0232	1		BUB1B	0			HIP1	3
KIT	1		C11orf1	0			HIPK1	3
KPNB1	1		HMGN2P46	0			HIPK2	3
LAMA5	1		NUTM1	0			HIST1H2AM	3
LASP1	1		RMI2	0			HIST1H2BC	3
LEF1	1		GID4	0			HIST1H2BK	3
LGALS3	1		METTL18	0			HNRNPA2B1	3
LHFP	1		TMEM230	0			HOXA3	3
LINGO2	1		C2CD2L	0			HOXC13	3
LRPPRC	1		CACNA1F	0			HSPA5	3
LRRC37B	1		CAD	0			IL1B	3
LRRC7	1		CALR	0			IL1R1	3
LYL1	1		CAMK2B	0			IL1RAP	3
MALT1	1		CAMK2G	0			IL21R	3
MAP3K1	1		CAPRIN1	0			IL2RA	3
MAP3K6	1		CARS	0			IL3	3
MBNL1	1		CASC5	0			CXCL8	3
MDH1	1		CASP3	0			INHBA	3
MEF2B	1		CAV1	0			IRS4	3
MEF2D	1		CBFA2T3	0			ITGB3	3
MELK	1		CBFB	0			ITK	3
MET	1		CBLC	0			JARID2	3
MLF1	1		CCDC28A	0			JAZF1	3
MLLT3	1		CCDC6	0			KAT2B	3
MLLT6	1		CCDC88C	0			KDM4C	3
MSH2	1		CCK	0			KDM5C	3
MSN	1		CCNA2	0			KDSR	3
MYC	1		CCNB1IP1	0			KPNB1	3
MYD88	1		CCNB3	0			KSR1	3
NAPA	1		CCND2	0			LAMP2	3
NCOA2	1		CCNE1	0			LEFTY2	3
NCOA3	1		CCNG1	0			LHX2	3
NCOA4	1		CCT6B	0			LNP1	3
NEDD4	1		CD19	0			LINC00598	3
NFKB2	1		CD274	0			LRPPRC	3
NFKBIA	1		CD36	0			LRRC37B	3
NIN	1		CD70	0			LRRC7	3
NKX2-5	1		CD74	0			LYL1	3
NOD1	1		CD79A	0			MALT1	3
NR4A3	1		CD79B	0			MAML2	3
NR6A1	1		CD8A	0			MAP2K6	3
NRAS	1		CDC14A	0			MAP2	3
NUP93	1		CDC14B	0			MAP3K6	3
OLIG2	1		CDC25A	0			MAP3K7	3
P2RY8	1		CDC42	0			MAPK3	3
PAFAH1B2	1		CDC73	0			MAPK8	3
PAX5	1		CDH11	0			MBNL1	3
PAX7	1		CDH1	0			MDC1	3
PCBP1	1		CDK12	0			MEF2C	3
PC	1		CDK1	0			MEF2D	3
PDCD1LG2	1		CDK2	0			MGMT	3
PDK1	1		CDK5RAP2	0			MLH1	3
PFDN5	1		CDK6	0			MLLT3	3
PI4KA	1		CDK9	0			MLLT6	3
PIK3R2	1		CDKL5	0			MMP7	3
PKM	1		CDKN1A	0			MPL	3
PMS1	1		CDKN1B	0			MSH6	3
POM121	1		CDKN2A	0			MSI2	3
POSTN	1		CDKN2B	0			MUTYH	3
PPM1D	1		CDKN2D	0			MYD88	3
PPP2R4	1		CDX1	0			NBR1	3
PRKACG	1		CDX2	0			NCKIPSD	3
PRKCD	1		CEBPB	0			NCOR2	3
PRRX1	1		CEBPD	0			NDC80	3
PSEN1	1		CEBPE	0			NEURL1	3
PTK2	1		CNTRL	0			NFATC2	3
PTTG1	1		CHEK1	0			NIN	3
PVT1	1		CHL1	0			NIPBL	3
RAC3	1		CHST11	0			NKX2-5	3
RAD21	1		CHUK	0			NPM1	3
RAD51C	1		CIITA	0			NR4A3	3
RAD51	1		CIRH1A	0			NRAS	3
RAF1	1		CKB	0			NUP93	3
RANBP2	1		CNTN1	0			OLIG2	3
RAP1GDS1	1		COG5	0			OMD	3
RNF213	1		COL1A2	0			P2RY8	3
RNF43	1		COL3A1	0			PAK6	3
ROBO2	1		COL9A3	0			PAX3	3
RPS6KA1	1		CPSF6	0			PAX5	3
RREB1	1		CRADD	0			PAX7	3
RRM2B	1		CRTC3	0			PCM1	3
RUNX1T1	1		CSF1	0			PC	3
RUNX2	1		CSF3R	0			PDGFD	3
SARNP	1		CSNK2A1	0			PDK1	3
SDHA	1		CTNNA1	0			PER1	3
SERPINF1	1		CTNNB1	0			PHOX2B	3
SETBP1	1		CTNND2	0			PI4KA	3
SRSF3	1		ACKR3	0			PIK3CB	3
SH2D5	1		CYP1B1	0			PIK3CD	3
SH3D19	1		SPECC1	0			PKM	3
SMARCA1	1		DACH1	0			PLA2G2A	3
SMARCB1	1		DACH2	0			PLCB1	3
SNHG5	1		DAXX	0			PLCG1	3
SNX9	1		DCLK2	0			PLEKHM2	3
SOCS1	1		DCN	0			POU5F1	3
SP1	1		DDR2	0			PPFIA2	3
SPOP	1		DDX10	0			PPP1CB	3
SPP1	1		DDX5	0			PPP1R13L	3
SPTBN1	1		DDX6	0			PPP2CB	3
SRGAP3	1		DEK	0			PPP3R1	3
SS18L1	1		DGKB	0			PQLC3	3
SSX2	1		DGKZ	0			PRMT8	3
STAT5A	1		DIRAS3	0			PSEN1	3
STAT5B	1		DKK1	0			PSMD2	3
SUFU	1		DKK2	0			PTGS2	3
TAL1	1		DKK4	0			PTK2B	3
TCL1A	1		DLEC1	0			PTK7	3
TCL6	1		DLL1	0			PTPN2	3
TCTA	1		DLL4	0			PTPRO	3
TEAD3	1		DMRTA2	0			PVT1	3
TERF1	1		DNAJB1	0			RAD21	3
TFPT	1		DNM1	0			RAD51C	3
TGFBR3	1		DNM2	0			RAD51B	3
TIAM1	1		DNM3	0			RELN	3
TLX3	1		DNMT1	0			RHOA	3
TMEM127	1		DOCK1	0			RHOD	3
TOP2B	1		DPM1	0			RHOH	3
TP73	1		DTX1	0			RLTPR	3
TPO	1		DTX4	0			RNF43	3
TPR	1		DUSP26	0			RPN2	3
VHL	1		DUSP2	0			RPS6KA1	3
WASF2	1		DUSP9	0			RREB1	3
WDFY3	1		EBF1	0			RTN3	3
WDR1	1		EDNRB	0			RUNX1T1	3
WDR70	1		EGFR	0			RYR3	3
WHSC1L1	1		EGF	0			SEPT5	3
WNT10A	1		EGR2	0			SETBP1	3
WNT11	1		EGR4	0			SETD7	3
WNT2B	1		EIF4E	0			SGPP2	3
WNT3	1		ELF4	0			SH3BP1	3
WNT4	1		ELK4	0			SH3GL2	3
XBP1	1		ELL	0			SIN3A	3
YTHDF2	1		ELN	0			SOCS1	3
YY1AP1	1		ELOVL2	0			SORT1	3
ZFP64	1		ELP2	0			SPTBN1	3
ZNF521	1		EML1	0			SS18	3
ABI1	0		EML4	0			STAT5B	3
ABL2	0		ENPP2	0			SULF1	3
ACACA	0		EP300	0			SYK	3
ACSBG1	0		EPC1	0			TAL1	3
ACVR1B	0		EPCAM	0			TCF12	3
ACVR1C	0		EPHA2	0			TEC	3
ADD3	0		EPHA3	0			TERF2	3
ADM	0		EPHA7	0			TGFB2	3
AFF4	0		EPHB1	0			TGFBR2	3
AGR3	0		EPHB6	0			THADA	3
AHI1	0		EPO	0			TIAM1	3
AK2	0		ERBB2	0			TLR4	3
AK5	0		ERBB3	0			TLX1	3
AKT1	0		ERBB4	0			TLX3	3
ALDH1A1	0		ERCC3	0			TNFRSF10B	3
ALDH2	0		ERCC5	0			TOP1	3
ALDOC	0		ERG	0			TOP2A	3
ALK	0		ERLIN2	0			TPO	3
ANGPT1	0		ESR1	0			TPR	3
APC	0		ETS1	0			TRIP11	3
APOD	0		ETV1	0			TRPS1	3
ARAF	0		ETV5	0			TTL	3
ARHGAP20	0		EWSR1	0			USP16	3
ARHGEF7	0		EXT1	0			USP42	3
ARID2	0		EYA1	0			VCAM1	3
ARRDC4	0		FAF1	0			VHL	3
ASMTL	0		AMER1	0			WASF2	3
ATF1	0		FAM19A5	0			WDR18	3
ATF3	0		NUTM2A	0			WHSC1	3
ATG5	0		FAM46C	0			WNT3	3
ATM	0		FANCC	0			WNT4	3
ATP1B4	0		FANCD2	0			WNT8B	3
ATRNL1	0		FANCF	0			WWOX	3
AURKA	0		FANCG	0			XBP1	3
AXL	0		FANCM	0			XKR3	3
BACH2	0		FASLG	0			YTHDF2	3
BAP1	0		FBXW7	0			ZFPM2	3
BARD1	0		FCGR2B	0			ZFYVE19	3
DDX39B	0		FCRL4	0			ZMIZ1	3
BAX	0		FGF14	0			ZMYM3	3
BAZ2A	0		FGF19	0			ABL2	2
BCL10	0		FGF23	0			ACSL6	2
BCL2	0		FGF2	0			ACVR1B	2
BCL7A	0		FGF3	0			AGR3	2
BCORL1	0		FGF4	0			ALK	2
BCR	0		FGF6	0			ARHGEF7	2
BICC1	0		FGF8	0			ARID1A	2
BIN1	0		FGFR1OP2	0			ARRDC4	2
BIRC3	0		FGFR1OP	0			ASXL1	2
BIRC6	0		FGFR2	0			ATG5	2
BRAF	0		FGFR3	0			ATP8A2	2
BRCA1	0		FHL2	0			ATRNL1	2
BRIP1	0		FH	0			ATR	2
BRSK1	0		FIGF	0			AURKA	2
BTG2	0		FLCN	0			BACH1	2
BTK	0		FLNC	0			DDX39B	2
BTLA	0		FLT1	0			BCAS3	2
BUB1B	0		FLT3LG	0			BCL10	2
C11orf1	0		FLT3	0			BCL9	2
HMGN2P46	0		FLT4	0			BHLHE22	2
RMI2	0		FLYWCH1	0			BICC1	2
METTL18	0		FNBP1	0			BIN1	2
TMEM230	0		FOSL1	0			BRWD3	2
C2CD2L	0		FOS	0			BTG2	2
CACNA1F	0		FOXL2	0			HMGN2P46	2
CAD	0		FRK	0			NUTM1	2
CALR	0		FRMPD4	0			TMEM230	2
CAMK2G	0		FRS2	0			C2CD2L	2
CAPRIN1	0		FRYL	0			CAMK2G	2
CARS	0		FSTL3	0			CAPRIN1	2
CASC5	0		FZD10	0			CASC5	2
CASP3	0		FZD2	0			CASP3	2
CAV1	0		FZD7	0			CBLC	2
CBLC	0		GAB1	0			CCDC28A	2
CCDC6	0		GANAB	0			CCDC88C	2
CCDC88C	0		GAS1	0			CCK	2
CCNA2	0		GAS5	0			CCND2	2
CCNB1IP1	0		GAS7	0			CD44	2
CCNB3	0		GATA6	0			CD70	2
CCND2	0		GBP2	0			CD79A	2
CCNG1	0		GIT2	0			CD8A	2
CCT6B	0		GLI1	0			CDC14A	2
CD274	0		GLI3	0			CDC14B	2
CD36	0		GMPS	0			CDC42	2
CD70	0		GNA13	0			CDH11	2
CD74	0		GNAQ	0			CDK12	2
CD79A	0		GOLGA5	0			CDK8	2
CD8A	0		GPC3	0			CDX2	2
CDC25A	0		GPHN	0			CHEK1	2
CDC73	0		GPR34	0			CHEK2	2
CDH1	0		GRIN2A	0			CHL1	2
CDK2	0		GRIN2B	0			CIC	2
CDK5RAP2	0		GRM1	0			CIITA	2
CDK6	0		GSK3B	0			CIT	2
CDK9	0		GSTT1	0			CKB	2
CDKL5	0		GTSE1	0			COL11A1	2
CDKN1A	0		HAS2	0			COL1A2	2
CDKN1B	0		HDAC1	0			COMMD1	2
CDKN2A	0		HDAC2	0			CRKL	2
CDKN2B	0		HDAC3	0			CSF1R	2
CDKN2D	0		HDAC6	0			CTCF	2
CDX1	0		HEPH	0			CTNND2	2
CDX2	0		HES5	0			DACH2	2
CEBPB	0		HIP1	0			DDX5	2
CEBPE	0		HIPK1	0			DKK2	2
CNTRL	0		HIPK2	0			DLL3	2
CHEK1	0		HIST1H1C	0			DOCK1	2
CHST11	0		HIST1H1D	0			DPM1	2
CHUK	0		HIST1H1E	0			DTX1	2
CIITA	0		HIST1H2AC	0			DUSP2	2
CNTN1	0		HIST1H2AG	0			E2F1	2
COG5	0		HIST1H2AL	0			EED	2
COL3A1	0		HIST1H2AM	0			EGFR	2
COL9A3	0		HIST1H2BC	0			EGF	2
CPSF6	0		HIST1H2BJ	0			EIF4E	2
CRADD	0		HIST1H2BK	0			ELF4	2
CRTC3	0		HIST1H2BO	0			EML1	2
CSF1R	0		HIST1H3B	0			EML4	2
CSF1	0		HIST1H4I	0			EPC1	2
CTNNB1	0		HLF	0			EPCAM	2
CTNND2	0		HMGA1	0			EPHA7	2
ACKR3	0		HMGB1	0			EPHB1	2
SPECC1	0		HOXA13	0			ERLIN2	2
DACH1	0		HOXA9	0			ESR1	2
DACH2	0		HOXC13	0			ETS1	2
DAXX	0		HOXD11	0			ETV4	2
DDX10	0		HOXD9	0			EWSR1	2
DDX5	0		HRAS	0			EXOSC6	2
DDX6	0		HSPA2	0			EXT2	2
DEK	0		HSPA4	0			EYA1	2
DIRAS3	0		HSPA5	0			EYA2	2
DKK2	0		IBSP	0			FAF1	2
DKK4	0		ICAM1	0			FAM46C	2
DLEC1	0		ICK	0			FANCG	2
DLL1	0		ID1	0			FANCI	2
DNAJB1	0		ID3	0			FGF14	2
DNM2	0		ID4	0			FGF23	2
DNM3	0		IDH1	0			FGF8	2
DNMT1	0		IDH2	0			FGFR3	2
DNMT3A	0		IGF1	0			FHL2	2
DOCK1	0		IGFBP3	0			FH	2
DPM1	0		IKBKB	0			FLT3LG	2
DTX1	0		IKBKE	0			FOSL1	2
DUSP9	0		IL12RB2	0			FOS	2
EBF1	0		IL13RA2	0			FOXO4	2
EDNRB	0		IL15	0			FRS2	2
EED	0		IL1B	0			FSTL3	2
EGFR	0		IL1R1	0			FUT1	2
EGF	0		IL21R	0			FZD2	2
EGR2	0		IL2	0			FZD6	2
EGR4	0		IL3	0			GAB1	2
EIF4E	0		IL6	0			GAS1	2
ELK4	0		IL7R	0			GAS5	2
ELOVL2	0		CXCL8	0			GATA6	2
EML4	0		INHBA	0			GLI1	2
ENPP2	0		INPP4A	0			GMPS	2
EP300	0		INPP4B	0			GRM1	2
EPC1	0		INPP5A	0			HAS2	2
EPCAM	0		IQCG	0			HDAC2	2
EPHA3	0		IRF1	0			HES1	2
EPHA7	0		IRF8	0			HHEX	2
EPHB1	0		ITGA5	0			HIST1H1C	2
EPO	0		ITGA7	0			HIST1H1D	2
ERBB2	0		ITGA8	0			HIST1H2AC	2
ERBB4	0		ITK	0			HIST1H2AG	2
ERCC3	0		ITPKA	0			HIST1H2BJ	2
ERCC5	0		JAG2	0			HIST1H2BO	2
ERLIN2	0		JAK1	0			HMGA1	2
ESR1	0		JAK2	0			HMGB1	2
ETS1	0		JAK3	0			HOXD9	2
ETV1	0		JARID2	0			HSPA4	2
ETV5	0		JAZF1	0			ICK	2
EXT1	0		JUN	0			IDH1	2
AMER1	0		KCNB1	0			IFRD1	2
FAM19A5	0		KDM2B	0			IGFBP2	2
NUTM2A	0		KDM5A	0			IKBKB	2
FANCC	0		KDM5C	0			IKZF1	2
FANCD2	0		KDM6A	0			IKZF2	2
FANCE	0		KDR	0			IL13	2
FANCF	0		ATG13	0			IL2	2
FANCG	0		KIAA1524	0			ITGA8	2
FANCM	0		CCAR2	0			JAG2	2
FASLG	0		KLF4	0			JAK1	2
FCRL4	0		KLHL6	0			JUN	2
FGF13	0		KSR1	0			KCNB1	2
FGF14	0		LAMA1	0			KDM6A	2
FGF19	0		LAMA5	0			KEAP1	2
FGF23	0		LCK	0			ATG13	2
FGF2	0		LEF1	0			KIT	2
FGFR2	0		LGR5	0			LHX4	2
FGFR3	0		LHFP	0			LINGO2	2
FH	0		LHX2	0			LMO7	2
FIGF	0		LHX4	0			LPAR1	2
FLCN	0		LMO1	0			LRMP	2
FLNC	0		LMO2	0			LRRC59	2
FLT1	0		LMO7	0			LTBP1	2
FLT4	0		LNP1	0			LYN	2
FLYWCH1	0		LINC00598	0			MACROD1	2
FNBP1	0		LOX	0			MADD	2
FOSL1	0		LPAR1	0			MAF	2
FOXL2	0		LPP	0			MAP2K1	2
FRK	0		LPXN	0			MAP3K1	2
FRMPD4	0		LRIG3	0			MAPK1	2
FRS2	0		LRMP	0			MBTD1	2
FRYL	0		LRRC59	0			MDH1	2
FSTL3	0		LTBP1	0			MEAF6	2
FZD10	0		LYN	0			MEF2B	2
FZD7	0		MACROD1	0			MELK	2
GAB1	0		MADD	0			METTL7B	2
GANAB	0		MAF	0			MET	2
GAS5	0		MAGED1	0			MIB1	2
GAS7	0		MAGEE1	0			KMT2B	2
GATA6	0		MAP2K1	0			MLLT10	2
GIT2	0		MAP2K4	0			MSN	2
GLI1	0		MAP2K5	0			MTUS2	2
GLI3	0		MAP2K6	0			MYCL	2
GMPS	0		MAP2	0			MYCN	2
GNA13	0		MAP3K14	0			MYC	2
GNAQ	0		MAP3K7	0			NCAM1	2
GPHN	0		MAPK3	0			NCSTN	2
GRIN2A	0		MAPK8	0			NDUFAF1	2
GRIN2B	0		MAPRE1	0			NEDD4	2
GRM1	0		MATK	0			NF1	2
GSK3B	0		MAX	0			NFKB1	2
GSTT1	0		MBNL1	0			NFKB2	2
GTSE1	0		MBTD1	0			NGFR	2
HAS2	0		MCL1	0			NGF	2
HDAC1	0		MDC1	0			NODAL	2
HDAC2	0		MDH1	0			NOTCH2	2
HDAC6	0		MDM4	0			NOTCH4	2
HES5	0		MDS2	0			NR6A1	2
HHEX	0		MEAF6	0			NTF3	2
HIP1	0		MEF2D	0			NUP214	2
HIST1H1C	0		METTL7B	0			NUP98	2
HIST1H1D	0		MFNG	0			OLIG1	2
HIST1H1E	0		MIB1	0			OLR1	2
HIST1H2AC	0		MKI67	0			PAK7	2
HIST1H2AG	0		MKL1	0			PCNA	2
HIST1H2AL	0		MLF1	0			PDCD11	2
HIST1H2AM	0		KMT2B	0			PDCD1LG2	2
HIST1H2BC	0		MLLT10	0			PDGFA	2
HIST1H2BK	0		MLLT1	0			PDGFB	2
HIST1H2BO	0		MLLT3	0			PDGFRA	2
HIST1H3B	0		MLLT6	0			PIK3CG	2
HIST1H4I	0		MMP7	0			PIM1	2
HMGA1	0		MMP9	0			PLAT	2
HMGB1	0		MNAT1	0			PML	2
HOXA13	0		MPL	0			POLD1	2
HOXA9	0		MSH6	0			POLD4	2
HOXD11	0		MSI2	0			POT1	2
HOXD9	0		MTUS2	0			POU2AF1	2
IBSP	0		MUTYH	0			PPAP2B	2
ICAM1	0		MYCL	0			PPP2R1A	2
ICK	0		MYCN	0			PRKACA	2
ID1	0		MYO1F	0			PRKCB	2
ID3	0		KAT6A	0			PRKCD	2
IDH1	0		KAT6B	0			PRSS8	2
IKBKE	0		NAB2	0			PTK2	2
IL12RB2	0		NBN	0			PTPRK	2
IL13RA2	0		NBR1	0			PTPRR	2
IL1B	0		NCAM1	0			RAC3	2
IL1R1	0		NCKIPSD	0			RANBP2	2
IL21R	0		NCOA1	0			RARA	2
IL2	0		NCOA2	0			RASGEF1A	2
IL3	0		NCOA3	0			RASGRP1	2
IL6	0		NCOA4	0			RBM15	2
IL7R	0		NCSTN	0			REEP3	2
INPP4B	0		NDC80	0			RELA	2
INPP5A	0		NDUFAF1	0			RGS7	2
IQCG	0		NEURL1	0			RPA3	2
IRF8	0		NFATC1	0			RRM2B	2
ITGA8	0		NFATC2	0			SEPT6	2
ITPKA	0		NFE2L2	0			SEPT9	2
JAG2	0		NFIB	0			SERPINF1	2
JAK2	0		NFKB1	0			SET	2
JAK3	0		NGFR	0			SF3B1	2
JARID2	0		NGF	0			SFRP2	2
JAZF1	0		NIPBL	0			SUGP2	2
JUN	0		NKX2-5	0			SRSF2	2
KCNB1	0		NOD1	0			SRSF3	2
KDM5A	0		NODAL	0			SGK1	2
KDM6A	0		NOTCH2	0			SH2D5	2
KDR	0		NOTCH4	0			SLC45A3	2
ATG13	0		NR3C1	0			SLCO1B3	2
KIAA1524	0		NR6A1	0			SMAD4	2
CCAR2	0		NRAS	0			SMARCA5	2
KLF4	0		NT5C2	0			SMARCB1	2
KLHL6	0		NTF3	0			SMC1A	2
KSR1	0		NTF4	0			SNX9	2
LCK	0		NTRK2	0			SOCS2	2
LGR5	0		NTRK3	0			SOX11	2
LHX2	0		NUP107	0			SP1	2
LHX4	0		NUP214	0			SPP1	2
LMO1	0		NUP98	0			SRF	2
LMO7	0		OLIG1	0			SSX4	2
LNP1	0		OLR1	0			STAG2	2
LINC00598	0		OMD	0			STAT3	2
LOX	0		P2RY8	0			STIL	2
LPAR1	0		PAFAH1B2	0			STK11	2
LPP	0		PAK1	0			SYP	2
LPXN	0		PAK7	0			TACC2	2
LRIG3	0		PAPPA	0			TACC3	2
LRMP	0		PASK	0			TCL6	2
LRRC59	0		PATZ1	0			TEAD2	2
LTBP1	0		PAX5	0			TERF1	2
LYN	0		PAX7	0			TFPT	2
MACROD1	0		PAX8	0			TGFB3	2
MADD	0		PCBP1	0			TGFBI	2
MAF	0		PCM1	0			TGFBR3	2
MAGED1	0		PC	0			THRAP3	2
MAGEE1	0		PDCD11	0			TMEM127	2
MAP2K1	0		PDCD1LG2	0			TNC	2
MAP2K4	0		PDGFA	0			TRHDE	2
MAP2K5	0		PDGFD	0			TSC1	2
MAP2K6	0		PDGFRA	0			TTK	2
MAP3K14	0		PDGFRB	0			USP5	2
MAP3K7	0		PDK1	0			USP7	2
MAPK3	0		PEG3	0			VTI1A	2
MAPRE1	0		PHB	0			WDR1	2
MATK	0		PHF1	0			WEE1	2
MAX	0		PHF23	0			WIF1	2
MCL1	0		PHOX2B	0			WISP3	2
MDC1	0		PI4KA	0			WNT11	2
MDM4	0		PICALM	0			WNT16	2
MEAF6	0		PIK3CA	0			WNT7B	2
METTL7B	0		PIK3CB	0			WRN	2
MFNG	0		PIK3CG	0			YPEL5	2
MIB1	0		PIM1	0			ZFP64	2
MKI67	0		PLA2G5	0			ZNF207	2
MKL1	0		PLAG1	0			ZNF24	2
KMT2B	0		PLCB1	0			ZNF521	2
MLLT10	0		PLCB4	0			ABI1	1
MLLT1	0		PLCG1	0			ACSBG1	1
MMP7	0		PLEKHM2	0			AK2	1
MMP9	0		PMS1	0			AK5	1
MNAT1	0		POFUT1	0			ALDH1A1	1
MPL	0		POLD1	0			ALDH2	1
MSH6	0		POLD4	0			ALDOC	1
MSI2	0		POLR2H	0			ANGPT1	1
MTUS2	0		POT1	0			ARAF	1
MYCL	0		POU2AF1	0			ARNT	1
MYCN	0		POU5F1	0			AR	1
MYO1F	0		PPAP2B	0			ATF1	1
KAT6A	0		PPM1D	0			ATF3	1
KAT6B	0		PPP1R13L	0			ATM	1
NAB2	0		PPP2R1A	0			AXL	1
NBN	0		PPP2R4	0			BAX	1
NBR1	0		PPP3CA	0			BCL2	1
NCAM1	0		PPP3CB	0			BCR	1
NCKIPSD	0		PPP3CC	0			BRCA1	1
NCOA1	0		PPP3R2	0			C11orf1	1
NCSTN	0		PQLC3	0			METTL18	1
NDC80	0		PRCC	0			CACNA1F	1
NDUFAF1	0		PRKACA	0			CAD	1
NEURL1	0		PRKCB	0			CALR	1
NFATC1	0		PRKCD	0			CASP7	1
NFATC2	0		PRMT1	0			CAV1	1
NFE2L2	0		PRMT8	0			CBFB	1
NFIB	0		PRRX1	0			CCDC6	1
NFKB1	0		PRRX2	0			CCND3	1
NGFR	0		PRSS8	0			CCNE1	1
NGF	0		PSEN1	0			CDK1	1
NIPBL	0		PSMD2	0			CDK5RAP2	1
NODAL	0		PTGS2	0			CDKN2A	1
NOTCH2	0		PTK2	0			CDKN2B	1
NOTCH4	0		PTPN2	0			CEBPE	1
NR3C1	0		PTPRA	0			COG5	1
NT5C2	0		PTPRK	0			COL3A1	1
NTF3	0		PTPRR	0			COL9A3	1
NTF4	0		PTTG1	0			CPSF6	1
NTRK2	0		RAD50	0			CRADD	1
NTRK3	0		RAD51C	0			CRTC3	1
NUP214	0		RAD51B	0			CSF1	1
NUP98	0		RAD51D	0			CTNNB1	1
OLR1	0		RANBP17	0			ACKR3	1
OMD	0		RANBP2	0			CYP2C19	1
PAK1	0		RARA	0			DDR2	1
PAK7	0		RASAL1	0			DDX10	1
PAPPA	0		RASGEF1A	0			DDX6	1
PASK	0		RASGRP1	0			DLEC1	1
PATZ1	0		RB1	0			DMRT1	1
PAX8	0		RBM15	0			DNM2	1
PDCD11	0		RCOR1	0			DNM3	1
PDGFA	0		REEP3	0			DNMT1	1
PDGFD	0		RELA	0			DNMT3A	1
PDGFRA	0		RERG	0			DUSP9	1
PDGFRB	0		RGS7	0			EGR1	1
PEG3	0		RHOD	0			ELL	1
PHB	0		RICTOR	0			ELOVL2	1
PHOX2B	0		RLTPR	0			ELP2	1
PICALM	0		RNF213	0			ENPP2	1
PIK3CA	0		RNF43	0			EPHB6	1
PIK3CG	0		ROBO1	0			EPOR	1
PIM1	0		ROBO2	0			EPO	1
PLA2G5	0		RPA3	0			ERBB4	1
PLAG1	0		RPL22	0			ERCC3	1
PLCB1	0		RPN2	0			ERCC5	1
PLCB4	0		RPS21	0			AMER1	1
PLCG1	0		RPS6KA1	0			FAM19A2	1
PLEKHM2	0		RPS6KA2	0			FAM19A5	1
POFUT1	0		RREB1	0			NUTM2A	1
POLD1	0		RTN3	0			FANCF	1
POLR2H	0		RYR3	0			FANCM	1
POT1	0		SCN8A	0			FGF3	1
POU2AF1	0		SDC4	0			FOXO3	1
POU5F1	0		SDHAF2	0			FZD10	1
PPAP2B	0		SEPT5	0			FZD7	1
PPP1R13L	0		SEPT6	0			GBP2	1
PPP2R1A	0		SEPT9	0			GNA13	1
PPP3CA	0		SETBP1	0			GOPC	1
PPP3CB	0		SETD7	0			GPC3	1
PQLC3	0		SET	0			GRIN2B	1
PRKACA	0		SF3B1	0			HDAC3	1
PRKCB	0		SFRP2	0			HDAC6	1
PRMT1	0		SUGP2	0			HIST1H1E	1
PRMT8	0		SRSF2	0			HIST1H2AL	1
PRRX2	0		SGPP2	0			HIST1H4I	1
PRSS8	0		SH3BP1	0			HOXA9	1
PSMD2	0		SH3D19	0			HOXD11	1
PTGS2	0		SH3GL2	0			HSPA1A	1
PTPRK	0		SIN3A	0			ID3	1
PTPRR	0		SLC45A3	0			IKBKE	1
RAD50	0		SLC7A5	0			IKZF3	1
RAD51B	0		SLCO1B3	0			IL13RA2	1
RAD51D	0		SMAD4	0			IL6	1
RANBP17	0		SMAD6	0			IL7R	1
RARA	0		SMARCA1	0			INPP4B	1
RASAL1	0		SMARCA4	0			IQCG	1
RASGEF1A	0		SMARCA5	0			IRF8	1
RASGRP1	0		SMC1A	0			JAK2	1
RB1	0		SMC3	0			KDM5A	1
RBM15	0		SNAPC3	0			KLF4	1
RCOR1	0		SNW1	0			LEF1	1
REEP3	0		SNX9	0			LMO1	1
RELA	0		SOCS1	0			LOX	1
RERG	0		SOCS2	0			LPP	1
RGS7	0		SORBS2	0			LPXN	1
RICTOR	0		SORT1	0			MAP2K5	1
RLTPR	0		SOX11	0			MAP3K14	1
ROBO1	0		SOX2	0			MAPRE1	1
RPA3	0		SP1	0			MAX	1
RPL22	0		SP3	0			MCL1	1
RPN1	0		SPOP	0			MFNG	1
RPN2	0		SPP1	0			MKL1	1
RPS21	0		SPRY4	0			MLLT1	1
RPS6KA2	0		SPTAN1	0			MMP9	1
RTN3	0		SRC	0			MSH2	1
SDC4	0		SRF	0			MYO1F	1
SDHAF2	0		SRRM3	0			KAT6B	1
SEPT5	0		SS18	0			NBN	1
SEPT6	0		SSBP2	0			NCOA1	1
SEPT9	0		SSX1	0			NFATC1	1
SETD7	0		SSX2	0			NFE2L2	1
SET	0		SSX4	0			NTRK2	1
SF3B1	0		STAT1	0			NTRK3	1
SFRP2	0		STAT3	0			PAK1	1
SUGP2	0		STAT4	0			PASK	1
SRSF2	0		STIL	0			PATZ1	1
SGPP2	0		STK11	0			PDGFRB	1
SH3GL2	0		STRN	0			PFDN5	1
SIN3A	0		STYK1	0			PHB	1
SLC45A3	0		SULF1	0			PICALM	1
SLC7A5	0		SUV39H2	0			PIK3R2	1
SLCO1B3	0		SUZ12	0			PLAG1	1
SMAD4	0		SYK	0			POLR2H	1
SMAD6	0		TACC2	0			POM121	1
SMARCA4	0		TACC3	0			POSTN	1
SMARCA5	0		TAF15	0			PPM1D	1
SMC1A	0		TAL1	0			PPP3CA	1
SMC3	0		TCEA1	0			PPP3CB	1
SNW1	0		TCF12	0			PRCC	1
SOCS2	0		TCF3	0			PRRX2	1
SORBS2	0		TCL1A	0			PTPRA	1
SORT1	0		TCL6	0			RAD50	1
SOX11	0		TEAD2	0			RAD51D	1
SOX2	0		TEAD3	0			RAD51	1
SP3	0		TEAD4	0			RB1	1
SPRY4	0		TEC	0			RCOR1	1
SPTAN1	0		TERF1	0			RICTOR	1
SRC	0		TERT	0			ROBO2	1
SRF	0		TFDP1	0			RPL22	1
SRRM3	0		TFEB	0			SDC4	1
SS18	0		TFG	0			SDHAF2	1
SSX4	0		TGFB2	0			SDHA	1
STAT1	0		TGFB3	0			SH3D19	1
STAT3	0		TGFBI	0			SLC7A5	1
STAT4	0		TGFBR3	0			SMARCA4	1
STIL	0		THADA	0			SMC3	1
STK11	0		THBS1	0			SNHG5	1
STRN	0		THRAP3	0			SORBS2	1
SULF1	0		TLR4	0			SP3	1
SUV39H2	0		TLX3	0			SRRM3	1
SYK	0		TMEM30A	0			SS18L1	1
TACC2	0		TNC	0			STAT4	1
TACC3	0		TNFAIP3	0			STRN	1
TCEA1	0		TNFRSF10B	0			SUFU	1
TEAD2	0		TNFRSF10D	0			SUV39H2	1
TEAD4	0		TNFRSF17	0			TEAD3	1
TERT	0		TNF	0			TERT	1
TFDP1	0		TOP1	0			TFDP1	1
TFEB	0		TOP2A	0			TFEB	1
TFG	0		TP53BP1	0			TFG	1
TGFB2	0		TP73	0			TMEM30A	1
TGFB3	0		TPO	0			TNFRSF17	1
TGFBI	0		TPR	0			TRAF3	1
THADA	0		TRAF3	0			TRAF5	1
THBS1	0		TRAF5	0			TRIM27	1
THRAP3	0		TRHDE	0			TSHR	1
TLR4	0		TRIM27	0			U2AF2	1
TMEM30A	0		TRIM33	0			UBE2B	1
TNC	0		TRIP11	0			WNT10A	1
TNFAIP3	0		TRPS1	0			WNT2B	1
TNFRSF10B	0		TSC1	0			WT1	1
TNFRSF17	0		TSHR	0			XPA	1
TNF	0		TTK	0			ZMYM2	1
TOP1	0		TTL	0			ZMYND11	1
TOP2A	0		U2AF2	0			ZNF217	1
TP53BP1	0		UBE2B	0			ZNF444	1
TRAF3	0		UBE2C	0			ZNF687	1
TRAF5	0		USP16	0			ZNF703	1
TRHDE	0		USP42	0			ACACA	0
TRIM27	0		USP7	0			ACVR1C	0
TRIM33	0		VCAM1	0			APC	0
TRIP11	0		VEGFA	0			CCNA2	0
TRPS1	0		VHL	0			CCNB3	0
TSC1	0		WASF2	0			CCT6B	0
TSHR	0		WDR1	0			CDK2	0
TTK	0		WEE1	0			CDKN1B	0
TTL	0		WHSC1L1	0			CDX1	0
U2AF2	0		WHSC1	0			CNTRL	0
UBE2B	0		WIF1	0			DACH1	0
UBE2C	0		WISP3	0			EGR4	0
USP16	0		WNT11	0			FANCE	0
USP42	0		WNT16	0			FGF2	0
VCAM1	0		WNT3	0			FGFR2	0
VEGFA	0		WNT4	0			FLNC	0
WEE1	0		WNT5B	0			GIT2	0
WHSC1	0		WNT6	0			GSTT1	0
WIF1	0		WNT7B	0			GTSE1	0
WISP3	0		WNT8B	0			HIST1H3B	0
WNT16	0		WRN	0			IBSP	0
WNT5B	0		WSB1	0			ICAM1	0
WNT6	0		WT1	0			IL12RB2	0
WNT7B	0		WWOX	0			INPP5A	0
WRN	0		WWTR1	0			ITPKA	0
WSB1	0		XBP1	0			LCK	0
WT1	0		XKR3	0			LGR5	0
WWOX	0		XPA	0			MDM4	0
XKR3	0		XPC	0			MNAT1	0
XPA	0		YAP1	0			KAT6A	0
XPC	0		YPEL5	0			NTF4	0
YAP1	0		YTHDF2	0			PLCB4	0
YPEL5	0		ZMIZ1	0			PRMT1	0
ZMIZ1	0		ZMYM2	0			RPN1	0
ZMYM2	0		ZMYM3	0			SMARCA1	0
ZMYND11	0		ZMYND11	0			SRGAP3	0
ZNF217	0		ZNF217	0			STAT1	0
ZNF24	0		ZNF24	0			TCEA1	0
ZNF687	0		ZNF687	0			TEAD4	0
ZNF703	0		ZNF703	0			THBS1	0
ZRSR2	0		ZRSR2	0			WSB1	0

## Sheet: Genelist for joint model
B1			B2			B3
Gene	Number of the associated cancer types		Gene	Number of the associated cancer types		Gene	Number of the associated cancer types
ETV6	6		APH1A	9		EPO	4
GOT1	6		HIST1H2AL	9		FASLG	4
CHIC2	5		CCAR2	9		WDR18	4
CSNK2A1	5		BTLA	8		CCND2	3
RUNX2	5		LAMA1	8		CRADD	3
AKT2	4		MSI2	8		DNM1	3
CAPRIN1	4		CDKN2D	7		EPS15	3
CBLC	4		ETV6	7		ESR1	3
CDK1	4		BRSK1	6		FZD7	3
CIITA	4		DUSP9	6		GAB1	3
CRKL	4		NFIB	6		GRIN2B	3
ELL	4		ATIC	5		MAP3K14	3
FANCD2	4		CBLB	5		MLF1	3
FEV	4		CHIC2	5		ROBO1	3
FUS	4		CLP1	5		ROS1	3
FZD3	4		WNT6	5		TNFAIP3	3
HOXC13	4		AHR	4		TOP2B	3
INPP5D	4		AIP	4		AHR	2
CCAR2	4		AKT2	4		AKT2	2
KSR1	4		AKT3	4		APC	2
LMO2	4		BCL7A	4		ARHGAP26	2
MAP2K4	4		BCORL1	4		CACNA1F	2
PDGFA	4		BTK	4		CCNB3	2
PPP2R4	4		RMI2	4		CCNG1	2
RASGRP1	4		CD28	4		CD74	2
SIRT1	4		CDH1	4		CDK6	2
SLC45A3	4		CEBPD	4		CIC	2
SNAPC3	4		DAXX	4		CIITA	2
TCF3	4		DCN	4		CLP1	2
TEAD2	4		FRYL	4		COL1A2	2
UBE2C	4		HOXC13	4		COL3A1	2
VEGFA	4		NCOR2	4		COL6A3	2
AHR	3		PPP1R13L	4		COX6C	2
AK5	3		RAD51D	4		CXCR4	2
ARIH2	3		ACVR1B	3		DKK4	2
ATL1	3		ACVR1C	3		EPHA7	2
ATR	3		ACVR2A	3		EPHB1	2
AXIN1	3		ADM	3		AMER1	2
BLM	3		AK2	3		FANCD2	2
BRIP1	3		AKAP6	3		FEN1	2
MB21D2	3		ANKRD28	3		FGF14	2
CBLB	3		ARHGAP26	3		FGF4	2
CCND2	3		ASMTL	3		FIGF	2
CDC14A	3		ATG5	3		FUS	2
CDK8	3		ATP1B4	3		FZD3	2
CDKN2D	3		ATRNL1	3		GAS1	2
CIC	3		ATR	3		GNAI1	2
COMMD1	3		BACH2	3		HHEX	2
COX6C	3		BAP1	3		HIST1H2AC	2
CRLF2	3		DDX39B	3		HIST1H2BO	2
CXCR4	3		BAZ2A	3		HNRNPA2B1	2
CYP1B1	3		BCL11B	3		ID1	2
SPECC1	3		BCR	3		IDH2	2
DDR2	3		GID4	3		IKBKE	2
DLL1	3		C2CD2L	3		IKZF1	2
DLL3	3		CACNA1F	3		IL2RA	2
DMRTA2	3		CAMK2B	3		KDM2B	2
DPM1	3		CCND3	3		KLF4	2
DUSP2	3		CCNG1	3		LAMA5	2
DUSP9	3		CD74	3		MAP2K5	2
EML4	3		CDC14A	3		MATK	2
EPHA3	3		CDC42	3		KMT2B	2
EPHA7	3		CDK6	3		MLLT10	2
EPS15	3		CDK8	3		MSN	2
FAF1	3		CEBPB	3		NCOA2	2
FANCL	3		CHUK	3		NCOR2	2
FBXW7	3		CNTN1	3		PAPPA	2
FGF23	3		COX6C	3		PDGFRA	2
FGFR1OP	3		CRADD	3		POM121	2
FGFR4	3		DACH1	3		POT1	2
FLT1	3		DACH2	3		PPP2CB	2
FOXL2	3		DLL1	3		RAD51B	2
FZD8	3		DLL3	3		RAD51	2
GAS7	3		DMRT1	3		RLTPR	2
GHR	3		DNAJB1	3		RNF213	2
GPR34	3		DOCK1	3		SDC4	2
HIST1H2BO	3		DPM1	3		SERPINE1	2
HRAS	3		EGFR	3		SF3B1	2
IGF1	3		EML4	3		SRSF2	2
ITK	3		EPS15	3		SOCS1	2
JARID2	3		ERBB2	3		STAT3	2
KEAP1	3		ERBB4	3		STRN	2
KPNB1	3		ERC1	3		TAF15	2
LAMA1	3		ETS1	3		TGFBR3	2
LNP1	3		AMER1	3		TSC1	2
LTBP1	3		FAM19A2	3		VEGFA	2
MKI67	3		FASLG	3		WNT6	2
MLLT10	3		FGF1	3		WWOX	2
MLLT6	3		FH	3		ZFYVE19	2
NAB2	3		FZD6	3		ABI1	1
NCAM1	3		GAS7	3		ACVR1C	1
NCOA4	3		GATA1	3		AHI1	1
NCOR2	3		GRM3	3		AIP	1
NF1	3		IFNG	3		AK5	1
NFIB	3		IKBKE	3		AKT1	1
NODAL	3		IKZF1	3		ALDH2	1
TENM1	3		IL13RA2	3		ALDOC	1
PAX8	3		IL2	3		ANGPT1	1
PDGFD	3		KIAA0232	3		ANLN	1
PIK3CB	3		LAMA5	3		APOD	1
PIK3R1	3		LGR5	3		ARHGAP20	1
PTGS2	3		LHX2	3		ARID1A	1
PTK2B	3		MAP3K14	3		ARID2	1
RAC3	3		MEF2B	3		ASMTL	1
RET	3		MET	3		ATF1	1
RHOD	3		NUMA1	3		ATL1	1
RNF213	3		PDGFA	3		ATM	1
ROS1	3		PTK2	3		ATP1B4	1
SEPT6	3		RPN1	3		AURKA	1
SMC1A	3		RPS6KA2	3		AXL	1
SOX2	3		SETD7	3		BCAS3	1
SSX4	3		SMC3	3		BCL2L2	1
STAT3	3		VCAM1	3		BCORL1	1
TAF15	3		ABLIM1	2		BCR	1
TCF12	3		ACACA	2		BICC1	1
TMEM30A	3		ACSL6	2		BMP4	1
TNF	3		AFF3	2		BRAF	1
TOP2B	3		AGR3	2		BRIP1	1
TPM4	3		AHI1	2		BTK	1
TRIM33	3		ALDH2	2		BTLA	1
TRPS1	3		ALDOC	2		GID4	1
TTL	3		ANLN	2		TMEM230	1
XPC	3		APOD	2		MB21D2	1
ARHGAP20	2		ARHGEF7	2		CEP85L	1
ARHGAP26	2		ARIH2	2		CALR	1
ARID1A	2		ARNT	2		CAMK2G	1
AR	2		AR	2		CAPRIN1	1
ATF1	2		ATF1	2		CASC5	1
ATF3	2		ATL1	2		CBFA2T3	1
ATIC	2		AURKB	2		CBLB	1
ATP1B4	2		AXIN1	2		CCDC6	1
AURKB	2		AXL	2		CCNA2	1
AUTS2	2		BACH1	2		CD58	1
BACH1	2		BCAS3	2		CD8A	1
BCL10	2		BCL10	2		CDC14A	1
BCL2	2		BIN1	2		CDC25A	1
BCORL1	2		BLM	2		CDH1	1
BCR	2		BRCA2	2		CDK1	1
BRAF	2		BRIP1	2		CDK8	1
BRCA1	2		BRWD3	2		CDK9	1
BRSK1	2		BTG2	2		CDKN2A	1
RMI2	2		BUB1B	2		CDKN2B	1
C2CD2L	2		HMGN2P46	2		CDKN2D	1
CAMK2B	2		NUTM1	2		CDX1	1
CBFA2T3	2		METTL18	2		CEBPA	1
CBL	2		MB21D2	2		CHCHD7	1
CCNB3	2		CEP85L	2		CHIC2	1
CCNG1	2		CAD	2		CMKLR1	1
CCT6B	2		CARS	2		COMMD1	1
CD274	2		CBFB	2		CRKL	1
CD36	2		CBLC	2		CRLF2	1
CDC25A	2		CCK	2		CRTC3	1
CDC42	2		CCND2	2		CSF3R	1
CDK2	2		CD58	2		CSNK1G2	1
CEBPD	2		CDC25A	2		CSNK2A1	1
CEP57	2		CDK2	2		CTNNA1	1
CMKLR1	2		CDK9	2		DAXX	1
COL1A2	2		CDX1	2		DDX6	1
COL3A1	2		CEBPE	2		DGKB	1
CSNK1G2	2		CEP57	2		DLEC1	1
CTNNA1	2		CHCHD7	2		DLL3	1
DACH1	2		CIITA	2		DMRT1	1
DCLK2	2		CIRH1A	2		DMRTA2	1
DCN	2		CKB	2		DNM3	1
DLL4	2		COL1A2	2		DNMT3A	1
DNAJB1	2		COL3A1	2		DOCK1	1
DTX4	2		COMMD1	2		DPM1	1
DUSP26	2		CPSF6	2		DUSP9	1
EGFR	2		CRKL	2		EBF1	1
EGR1	2		CRLF2	2		EIF4E	1
EIF4E	2		CSF1R	2		ELK4	1
EPHB6	2		CSF1	2		ELL	1
ERBB3	2		CSNK1G2	2		ENPP2	1
ERC1	2		CTNND2	2		EPHA3	1
ERCC6	2		DCLK2	2		EPHB6	1
ETS1	2		DGKB	2		EPOR	1
ETV5	2		DIRAS3	2		ERBB4	1
FAM127C	2		DKK4	2		ERC1	1
FAM19A2	2		DNM3	2		ERCC3	1
FAM46C	2		DOT1L	2		ERCC5	1
FANCC	2		EIF4E	2		ERG	1
FANCE	2		ELP2	2		ERLIN2	1
FBN2	2		ENPP2	2		ETS2	1
FCGR2B	2		EPO	2		ETV5	1
FCRL4	2		ERCC3	2		EWSR1	1
FEN1	2		ESR1	2		EXT1	1
FGF2	2		ETV5	2		EXT2	1
FGF4	2		EXT2	2		EYA2	1
FGF9	2		FANCG	2		FANCG	1
FGFR1OP2	2		FANCI	2		FANCL	1
FHL2	2		FBN2	2		FANCM	1
FLYWCH1	2		FBXW7	2		FBXW7	1
FOS	2		FCGR2B	2		FCRL4	1
FOXO4	2		FCRL4	2		FGF6	1
FZD7	2		FEV	2		FGFR1OP2	1
GANAB	2		FGF13	2		FGFR1OP	1
GATA1	2		FGF23	2		FHL2	1
GLI3	2		FGF6	2		FH	1
GMPS	2		FGF9	2		FLT3	1
GOSR1	2		FGFR4	2		FLYWCH1	1
GRM3	2		FHL2	2		FOSB	1
GSTT1	2		FOS	2		FOS	1
HES5	2		FOXO4	2		FOXL2	1
HIST1H2AL	2		FUS	2		FOXO3	1
HIST1H2BJ	2		FZD8	2		FRS2	1
HIST1H4I	2		GAB1	2		FRYL	1
HOXD9	2		GAS1	2		FSTL3	1
HSPA5	2		GAS5	2		GAS7	1
HTRA1	2		GHR	2		GATA1	1
ID4	2		GLI1	2		GBP2	1
INPP4A	2		GMPS	2		GHR	1
IQCG	2		GNAI1	2		GLI1	1
IRF1	2		GOLGA5	2		GMPS	1
ITGA7	2		GPR34	2		GNG4	1
KDR	2		GSK3B	2		GPHN	1
ATG13	2		HDAC2	2		GPR34	1
LAMP2	2		HIST1H2AC	2		GRIN2A	1
LASP1	2		HIST1H2BO	2		GRM3	1
LGR5	2		HIST1H4I	2		GSK3B	1
LHX2	2		HOXA13	2		HEPH	1
LMO7	2		HOXD11	2		HES1	1
LINC00598	2		ID4	2		HES5	1
MAF	2		IKZF2	2		HIST1H2BJ	1
MAGED1	2		IL1RAP	2		HIST1H2BK	1
MAGEE1	2		KLHL6	2		HIST1H4I	1
MAP2K5	2		KPNB1	2		HLF	1
MAP2K6	2		KSR1	2		HOXA13	1
MFNG	2		LMO7	2		HOXD11	1
MLF1	2		LNP1	2		HOXD9	1
MNAT1	2		MAGED1	2		HSPA1A	1
MTUS2	2		MAP2K4	2		HSPA4	1
MYCN	2		MAP2K5	2		ID4	1
NCKIPSD	2		MAP2K6	2		IFNG	1
NCOA1	2		MDH1	2		IFRD1	1
NCOA3	2		METTL7B	2		IGF1	1
NEURL1	2		MKI67	2		IGFBP2	1
NIPBL	2		MMP7	2		IKBKB	1
NR4A3	2		MTUS2	2		IL1R1	1
NT5C2	2		MYCN	2		IL3	1
NUMA1	2		NCAM1	2		INPP4A	1
NUP107	2		NCSTN	2		IRF1	1
NUP214	2		PAFAH1B2	2		IRS4	1
OLIG1	2		PAPPA	2		ITGA5	1
OLIG2	2		PATZ1	2		JAK2	1
PAPPA	2		PAX5	2		JAK3	1
PCNA	2		PDE4DIP	2		JARID2	1
PDCD11	2		PI4KA	2		KCNB1	1
PDE4DIP	2		PIK3CG	2		KDR	1
PDK1	2		PLCG1	2		KDSR	1
PHF1	2		PLEKHM2	2		KIAA0232	1
PI4KA	2		PML	2		KIAA1524	1
PIK3CD	2		POLD4	2		KIT	1
PIM1	2		PPFIA2	2		KPNB1	1
PKM	2		PPP2R4	2		LAMA1	1
PLA2G5	2		PPP3R2	2		LCK	1
PLCG1	2		PTK2B	2		LGR5	1
PMS1	2		RAD51B	2		LHX2	1
POLD4	2		RASAL1	2		LHX4	1
POM121	2		RET	2		LINC00598	1
PPFIA2	2		RHOH	2		LOX	1
PPFIBP1	2		ROS1	2		LPXN	1
PPP2CB	2		RUNX2	2		LRIG3	1
PPP3R1	2		SCN8A	2		LRPPRC	1
PRKCD	2		SEPT6	2		LRRC59	1
PRKG2	2		SF3B1	2		LRRC7	1
PTPRO	2		SLC1A2	2		LTBP1	1
RAD51B	2		SMAD6	2		MADD	1
RASAL1	2		SOX11	2		MAF	1
RBM15	2		SP3	2		MAGEE1	1
ROBO1	2		STYK1	2		MAP2K4	1
RPN1	2		TCF3	2		MAP2K6	1
RPS6KA2	2		TCL1A	2		MAP2	1
RREB1	2		TGFBI	2		MAP3K7	1
RYR3	2		UBE2C	2		MAPK8	1
SDHAF2	2		WWOX	2		MDM4	1
SEPT2	2		ABI1	1		MEF2D	1
SUGP2	2		AFF4	1		MLLT1	1
SRSF2	2		AK5	1		MLLT3	1
SLCO1B3	2		AKT1	1		MSH2	1
SMAD4	2		AMH	1		MSH6	1
SNHG5	2		ANGPT1	1		MUTYH	1
SOX11	2		APC	1		MYCL	1
SPOP	2		ARAF	1		MYD88	1
SPRY2	2		ARHGAP20	1		KAT6A	1
SPTBN1	2		ARID1A	1		KAT6B	1
SRF	2		ARRDC4	1		NAPA	1
SS18	2		ASXL1	1		NBR1	1
SSBP2	2		ATF3	1		NCKIPSD	1
STIL	2		ATM	1		NCOA1	1
STK11	2		AUTS2	1		NCSTN	1
STYK1	2		BAX	1		NDC80	1
SYK	2		BCL2L2	1		NF1	1
SYP	2		BCL9	1		NFIB	1
TAL2	2		BICC1	1		NIPBL	1
TERF2	2		BIRC6	1		NOTCH4	1
TFEB	2		BRAF	1		NRAS	1
TFG	2		BRCA1	1		NT5C2	1
TGFB3	2		BTG1	1		NTF3	1
THADA	2		TMEM230	1		NTRK2	1
TLR4	2		CALR	1		NTRK3	1
TNFRSF10D	2		CAMK2G	1		NUP107	1
TOP2A	2		CAPRIN1	1		TENM1	1
TRHDE	2		CASP7	1		PAK7	1
WASF2	2		CBL	1		PASK	1
WDFY3	2		CCDC6	1		PAX3	1
WDR18	2		CCL2	1		PAX7	1
WISP3	2		CCNA2	1		PCNA	1
WT1	2		CCNB1IP1	1		PDE4DIP	1
WWOX	2		CCNB3	1		PDGFA	1
ZMIZ1	2		CCNE1	1		PHB	1
ZRSR2	2		CCT6B	1		PI4KA	1
ABLIM1	1		CD19	1		PIK3CB	1
ACSBG1	1		CD274	1		PIM1	1
ACVR1C	1		CD44	1		PLCB1	1
AFF3	1		CD70	1		PLCG1	1
AFF4	1		CD79B	1		POFUT1	1
AIP	1		CD8A	1		POLD4	1
AK2	1		CDC14B	1		PPFIBP1	1
AKT1	1		CDC25C	1		PPM1D	1
AKT3	1		CDC73	1		PPP1R13L	1
ANKRD28	1		CDH11	1		PPP2R1A	1
APC	1		CDK12	1		PPP2R4	1
APH1A	1		CDK1	1		PPP3R1	1
ARAF	1		CDK5RAP2	1		PRKACA	1
ARHGEF7	1		CDKL5	1		PRKCB	1
ARNT	1		CDKN1A	1		PRKG2	1
ATG5	1		CDX2	1		PTGS2	1
ATM	1		CEBPA	1		PTK2B	1
ATP8A2	1		CIC	1		PTPN2	1
ATRNL1	1		CIT	1		PTPRA	1
BAP1	1		CMKLR1	1		PTPRO	1
DDX39B	1		COG5	1		RAD51D	1
BCL11B	1		CRTC3	1		RAF1	1
BCL2A1	1		CSNK2A1	1		RANBP17	1
BCL2L1	1		CTNNA1	1		RANBP2	1
BRCA2	1		CXCR4	1		RASAL1	1
BTG2	1		CYP1B1	1		RASGEF1A	1
BTK	1		SPECC1	1		RASGRP1	1
HMGN2P46	1		DDR2	1		RERG	1
NUTM1	1		DDX5	1		RET	1
GID4	1		DDX6	1		RGS7	1
METTL18	1		DEK	1		RHOA	1
TMEM230	1		DKK2	1		RHOD	1
CEP85L	1		DLEC1	1		RICTOR	1
CARS	1		DMRTA2	1		RNF43	1
CASP3	1		DNM1	1		RREB1	1
CBFB	1		DNMT1	1		SARNP	1
CCDC88C	1		DNMT3A	1		SDHA	1
CCK	1		DST	1		SEPT6	1
CCL2	1		DTX1	1		SETBP1	1
CCNB1IP1	1		DUSP2	1		SETD7	1
CCND3	1		E2F1	1		SET	1
CCNE1	1		EED	1		SFRP2	1
CD19	1		EGF	1		SUGP2	1
CD44	1		EGR2	1		SIRT1	1
CD58	1		ELF4	1		SMAD4	1
CD70	1		ELN	1		SMAD6	1
CD74	1		ELOVL2	1		SMARCB1	1
CD79A	1		EML1	1		SNHG5	1
CD79B	1		EP300	1		SNW1	1
CDC14B	1		EPCAM	1		SNX9	1
CDC73	1		EPHA3	1		SOCS2	1
CDH1	1		EPHA7	1		SORBS2	1
CDK5RAP2	1		EPHB1	1		SOX11	1
CDK6	1		ERBB3	1		SOX2	1
CDK9	1		ERCC1	1		SPTAN1	1
CDKN2B	1		ERCC5	1		SPTBN1	1
CDX2	1		ERG	1		SRC	1
CEBPE	1		EWSR1	1		SS18L1	1
CNTRL	1		EXT1	1		SS18	1
CHEK1	1		EYA2	1		SSBP2	1
CHL1	1		FAF1	1		SSX1	1
CHST11	1		FAM127C	1		SSX2	1
CHUK	1		FAM19A5	1		SSX4	1
CLP1	1		NUTM2A	1		STAG2	1
CNTN1	1		FANCC	1		STAT1	1
CPSF6	1		FANCD2	1		STAT4	1
CRTC3	1		FANCE	1		STAT5B	1
CSF3R	1		FANCL	1		STIL	1
CTRB1	1		FANCM	1		SULF1	1
DACH2	1		FGF19	1		TACC3	1
DDX5	1		FGF2	1		TAL2	1
DDX6	1		FGF4	1		TCEA1	1
DGKB	1		FGFR3	1		TCL6	1
DIRAS3	1		FIGF	1		TEAD3	1
DKK4	1		FLT1	1		TEAD4	1
DLEC1	1		FLT3	1		TFDP1	1
DMRT1	1		FLT4	1		TFEB	1
DNM3	1		FLYWCH1	1		TFG	1
DNMT3A	1		FOXL2	1		TFPT	1
DOT1L	1		FOXO1	1		TFRC	1
DST	1		FRMPD4	1		TGFB3	1
E2F1	1		FZD10	1		TGFBR2	1
ELOVL2	1		FZD3	1		THADA	1
ELP2	1		FZD7	1		THBS1	1
ENPP2	1		GATA6	1		THRAP3	1
EP300	1		GIT2	1		TMEM30A	1
EPCAM	1		GLI3	1		TNFRSF10D	1
EPHA2	1		GNA13	1		TNFRSF17	1
ERBB2	1		GOSR1	1		TOP2A	1
ERCC5	1		GPC3	1		TP73	1
ERLIN2	1		GRIN2A	1		TRAF5	1
ESR1	1		GRIN2B	1		TRIM27	1
ETS2	1		GRM1	1		TTK	1
ETV4	1		GSTT1	1		TTL	1
EXT2	1		GTSE1	1		UBE2C	1
EYA2	1		HES1	1		WDR70	1
EZH2	1		HIPK2	1		WEE1	1
AMER1	1		HIST1H1E	1		WHSC1L1	1
FAS	1		HIST1H2AM	1		WIF1	1
FGF13	1		HIST1H2BC	1		WNT11	1
FGF14	1		HLF	1		WNT2B	1
FGF19	1		HMGA1	1		WNT3	1
FGF3	1		HMGB1	1		XKR3	1
FGF6	1		HOXD9	1		XPC	1
FLT3LG	1		HSPA1A	1		YPEL5	1
FLT3	1		HSPA4	1		YTHDF2	1
FLT4	1		HTRA1	1		YY1AP1	1
FNBP1	1		ICK	1		ZFPM2	1
FOSB	1		IDH2	1		ZMYM2	1
FOXO1	1		IGF1	1		ZNF24	1
FOXO3	1		IGFBP2	1		ABL2	0
FRK	1		IGFBP3	1		ABLIM1	0
FRS2	1		IKZF3	1		ACACA	0
FRYL	1		IL12RB2	1		ACSBG1	0
FUT1	1		IL1R1	1		ACSL6	0
FZD10	1		IL7R	1		ACVR1B	0
FZD2	1		CXCL8	1		ACVR2A	0
GAB1	1		INHBA	1		ADD3	0
GNAI1	1		INPP4A	1		ADM	0
GNAQ	1		INPP4B	1		AFF3	0
GNG4	1		INPP5A	1		AFF4	0
GOLGA5	1		IRF1	1		AGR3	0
GOPC	1		IRS4	1		AK2	0
GPC3	1		ITGA5	1		AKAP6	0
GRM1	1		ITGA8	1		AKT3	0
H3F3A	1		ITGB3	1		ALDH1A1	0
HAS2	1		ITK	1		ALK	0
HIP1	1		ITPKA	1		AMH	0
HIPK2	1		JAK2	1		ANKRD28	0
HIST1H1C	1		JARID2	1		APH1A	0
HIST1H1E	1		KAT2B	1		ARAF	0
HIST1H2AG	1		KCNB1	1		ARHGEF7	0
HIST1H2AM	1		KDM5C	1		ARIH2	0
HIST1H2BC	1		KDM6A	1		ARNT	0
HIST1H2BK	1		KEAP1	1		ARRDC4	0
HIST1H3B	1		LAMP2	1		AR	0
HMGB1	1		LEFTY2	1		ASXL1	0
HNRNPA2B1	1		LGALS3	1		ATF3	0
HOXA11	1		LHX4	1		ATG5	0
HOXA13	1		LMO2	1		ATIC	0
HOXD11	1		LRMP	1		ATP8A2	0
HSPA1A	1		LRRC37B	1		ATRNL1	0
HSPA2	1		LRRC59	1		ATR	0
HSPA4	1		LRRC7	1		AURKB	0
IBSP	1		LTBP1	1		AUTS2	0
ICK	1		MAD2L1	1		AXIN1	0
ID1	1		MAGEE1	1		BACH1	0
IDH2	1		MAML1	1		BACH2	0
IFNG	1		MAP2K1	1		BAP1	0
IGFBP2	1		MAPK1	1		BARD1	0
IGFBP3	1		MAPK3	1		DDX39B	0
IKBKB	1		MAPRE1	1		BAX	0
IKBKE	1		MATK	1		BAZ2A	0
IKZF1	1		MAX	1		BCL10	0
IKZF2	1		MBTD1	1		BCL11B	0
IKZF3	1		MEF2D	1		BCL2A1	0
IL12RB2	1		MGMT	1		BCL2L1	0
IL13RA2	1		MIB1	1		BCL2	0
IL1RAP	1		MKL1	1		BCL7A	0
IL2RA	1		MLLT1	1		BCL9	0
IL2	1		MLLT3	1		BHLHE22	0
IL3	1		MLLT6	1		BIN1	0
INHBA	1		MSH2	1		BIRC3	0
INPP5A	1		MSH6	1		BIRC6	0
IRS4	1		MUTYH	1		BLM	0
ITGA5	1		MYCL	1		BRCA1	0
ITGA8	1		NBN	1		BRCA2	0
ITGB3	1		NCKIPSD	1		BRSK1	0
JAK2	1		NCOA2	1		BRWD3	0
JAZF1	1		NEURL1	1		BTG1	0
KAT2B	1		NFKB1	1		BTG2	0
KCNB1	1		NFKB2	1		BUB1B	0
KDM2B	1		NGFR	1		C11orf1	0
KDSR	1		NGF	1		HMGN2P46	0
KIAA0232	1		NOTCH4	1		NUTM1	0
KIT	1		NPM1	1		RMI2	0
KLHL6	1		NT5C2	1		METTL18	0
LAMA5	1		NTF4	1		C2CD2L	0
LGALS3	1		NTRK2	1		CAD	0
LHFP	1		NTRK3	1		CAMK2B	0
LHX4	1		NUP98	1		CARS	0
LRIG3	1		TENM1	1		CASP3	0
LRRC59	1		OLIG2	1		CASP7	0
LRRC7	1		OMD	1		CAV1	0
LYL1	1		PASK	1		CBFB	0
MACROD1	1		PAX3	1		CBLC	0
MADD	1		PAX7	1		CBL	0
MALT1	1		PCBP1	1		CCDC28A	0
MAML1	1		PCNA	1		CCDC88C	0
MAP2K1	1		PC	1		CCK	0
MAP2	1		PDGFB	1		CCL2	0
MAP3K14	1		PDGFRA	1		CCNB1IP1	0
MAP3K6	1		PHF23	1		CCND3	0
MAP3K7	1		PIK3CB	1		CCNE1	0
MAPK1	1		PIK3R1	1		CCT6B	0
MAPK8	1		PIM1	1		CD19	0
MATK	1		PKM	1		CD274	0
MAX	1		PMS1	1		CD28	0
MCL1	1		POLD1	1		CD36	0
MDH1	1		POT1	1		CD44	0
MEF2B	1		POU2AF1	1		CD70	0
MEF2C	1		PPAP2B	1		CD79A	0
MEF2D	1		PPARGC1A	1		CD79B	0
MET	1		PPFIBP1	1		CDC14B	0
MGMT	1		PPP2CB	1		CDC25C	0
MKL1	1		PPP2R1A	1		CDC42	0
MLH1	1		PRKCD	1		CDC73	0
KMT2B	1		PRRX1	1		CDH11	0
MMP7	1		PRSS8	1		CDK12	0
MSH6	1		PTGS2	1		CDK2	0
MSN	1		PTK7	1		CDK5RAP2	0
MYB	1		PTPRK	1		CDKL5	0
MYC	1		PTTG1	1		CDKN1A	0
MYD88	1		PVT1	1		CDKN1B	0
NAPA	1		RAC3	1		CDX2	0
NBN	1		RAD51C	1		CEBPB	0
NCOA2	1		RAF1	1		CEBPD	0
NCSTN	1		RANBP2	1		CEBPE	0
NDC80	1		RERG	1		CNTRL	0
NFKB2	1		RHOD	1		CEP57	0
NFKBIA	1		RNF213	1		CHEK1	0
NR3C1	1		RPA3	1		CHEK2	0
NTF3	1		RPS6KA1	1		CHL1	0
NTRK3	1		RREB1	1		CHST11	0
NUP93	1		RUNX1T1	1		CHUK	0
OLR1	1		RYR3	1		CIRH1A	0
P2RY8	1		SDHA	1		CIT	0
PAFAH1B2	1		SERPINF1	1		CKB	0
PAK1	1		SFRP2	1		CLTCL1	0
PAK6	1		SRSF2	1		CNTN1	0
PATZ1	1		SGK1	1		COG5	0
PAX5	1		SGPP2	1		COL11A1	0
PAX7	1		SH3BP1	1		COL9A3	0
PC	1		SIRT1	1		CPNE1	0
PDCD1LG2	1		SLC45A3	1		CPSF6	0
PEG3	1		SLCO1B3	1		CSF1R	0
PIK3CA	1		SMAD4	1		CSF1	0
PLA2G2A	1		SMARCA4	1		CTCF	0
PLAG1	1		SNAPC3	1		CTNNB1	0
PLAT	1		SNX9	1		CTNND2	0
PLCB4	1		SOCS1	1		CTRB1	0
PLEKHM2	1		SOCS2	1		ACKR3	0
PML	1		SPP1	1		CYP1B1	0
POLD1	1		SPRY2	1		CYP2C19	0
POSTN	1		SRC	1		SPECC1	0
POT1	1		SRF	1		DACH1	0
POU2AF1	1		SS18	1		DACH2	0
PPAP2B	1		SSBP2	1		DCLK2	0
PPARGC1A	1		STAT1	1		DCN	0
PPM1D	1		STK11	1		DDR2	0
PPP1R13L	1		STRN	1		DDX10	0
PPP3R2	1		SYP	1		DDX5	0
PQLC3	1		TACC3	1		DEK	0
PRKCB	1		TCF12	1		DGKZ	0
PRMT1	1		TERF2	1		DIRAS3	0
PRRX1	1		TFG	1		DKK1	0
PSEN1	1		THBS1	1		DKK2	0
PSMD2	1		THRAP3	1		DLL1	0
PTK2	1		TIAM1	1		DLL4	0
PTPN2	1		TLR4	1		DNAJB1	0
PTPRK	1		TLX3	1		DNM2	0
PTTG1	1		TMEM30A	1		DNMT1	0
PVT1	1		TNFRSF10D	1		DOT1L	0
RAD50	1		TNF	1		DST	0
RAD51	1		TOP2A	1		DTX1	0
RAF1	1		TOP2B	1		DTX4	0
RAP1GDS1	1		TPM4	1		DUSP26	0
RARA	1		TPR	1		DUSP2	0
RASGEF1A	1		TRAF3	1		E2F1	0
RB1	1		TRAF5	1		EDNRB	0
RERG	1		TRIM27	1		EED	0
RGS7	1		TRIM33	1		EGFR	0
RHOA	1		TSC1	1		EGF	0
RHOH	1		WASF2	1		EGR1	0
RICTOR	1		WDR18	1		EGR2	0
RPA3	1		WEE1	1		EGR4	0
RPN2	1		WHSC1L1	1		ELF4	0
RPS21	1		WNT11	1		ELN	0
RPS6KA1	1		WNT16	1		ELOVL2	0
RUNX1T1	1		WNT5B	1		ELP2	0
SARNP	1		WNT7B	1		EML1	0
SCN8A	1		XPC	1		EML4	0
SDC4	1		ZFP64	1		EP300	0
SDHA	1		ZMYM2	1		EPC1	0
SEPT5	1		ZNF207	1		EPCAM	0
SETBP1	1		ZNF687	1		EPHA2	0
SETD7	1		ZRSR2	1		ERBB2	0
SET	1		ABL2	0		ERBB3	0
SF3B1	1		ACSBG1	0		ERCC1	0
SFRP2	1		ADD3	0		ERCC6	0
SHC1	1		ALDH1A1	0		ETS1	0
SLC1A2	1		ALK	0		ETV1	0
SMARCA1	1		ARID2	0		ETV4	0
SMARCA5	1		ATP8A2	0		ETV6	0
SMC3	1		AURKA	0		EXOSC6	0
SNW1	1		BARD1	0		EYA1	0
SNX9	1		BCL2A1	0		EZH2	0
SOCS1	1		BCL2L1	0		FAF1	0
SP1	1		BCL2	0		FAM127C	0
SP3	1		BHLHE22	0		FAM19A2	0
SPRY4	1		BIRC3	0		FAM19A5	0
SPTAN1	1		BMP4	0		NUTM2A	0
SRC	1		C11orf1	0		FAM46C	0
SS18L1	1		CASC5	0		FANCC	0
SSX2	1		CASP3	0		FANCE	0
STAG2	1		CAV1	0		FANCF	0
STAT4	1		CBFA2T3	0		FANCI	0
STAT5B	1		CCDC28A	0		FAS	0
STRN	1		CCDC88C	0		FBN2	0
TACC3	1		CD36	0		FCGR2B	0
TCEA1	1		CD79A	0		FEV	0
TCL1A	1		CDKN1B	0		FGF13	0
TCTA	1		CDKN2A	0		FGF19	0
TEAD3	1		CDKN2B	0		FGF1	0
TEC	1		CNTRL	0		FGF23	0
TGFBI	1		CHEK1	0		FGF2	0
THBS1	1		CHEK2	0		FGF3	0
TIAM1	1		CHL1	0		FGF8	0
TLX3	1		CHST11	0		FGF9	0
TNC	1		CLTCL1	0		FGFR2	0
TNFAIP3	1		COL11A1	0		FGFR3	0
TNFRSF17	1		COL6A3	0		FGFR4	0
TP73	1		COL9A3	0		FLCN	0
TPO	1		CPNE1	0		FLNC	0
TPR	1		CSF3R	0		FLT1	0
TRAF5	1		CTCF	0		FLT3LG	0
TRIM27	1		CTNNB1	0		FLT4	0
TSC1	1		CTRB1	0		FNBP1	0
TTK	1		ACKR3	0		FOSL1	0
USP42	1		CYP2C19	0		FOXO1	0
VCAM1	1		DDX10	0		FOXO4	0
VHL	1		DGKZ	0		FRK	0
WDR1	1		DKK1	0		FRMPD4	0
WHSC1	1		DLL4	0		FUT1	0
WNT10A	1		DNM2	0		FZD10	0
WNT11	1		DTX4	0		FZD2	0
WNT16	1		DUSP26	0		FZD6	0
WNT2B	1		EBF1	0		FZD8	0
WNT3	1		EDNRB	0		GANAB	0
WNT4	1		EGR1	0		GAS5	0
WNT6	1		EGR4	0		GATA6	0
WNT7B	1		ELK4	0		GIT2	0
WNT8B	1		ELL	0		GLI3	0
WRN	1		EPC1	0		GNA13	0
XIAP	1		EPHA2	0		GNAQ	0
XKR3	1		EPHB6	0		GOLGA5	0
YAP1	1		EPOR	0		GOPC	0
ZFPM2	1		ERCC6	0		GOSR1	0
ZNF217	1		ERLIN2	0		GOT1	0
ZNF24	1		ETS2	0		GPC3	0
ZNF687	1		ETV1	0		GRM1	0
ABI1	0		ETV4	0		GSTT1	0
ABL2	0		EXOSC6	0		GTSE1	0
ACACA	0		EYA1	0		H3F3A	0
ACSL6	0		EZH2	0		HAS2	0
ACVR1B	0		FAM46C	0		HDAC1	0
ACVR2A	0		FANCF	0		HDAC2	0
ADD3	0		FAS	0		HDAC3	0
ADM	0		FEN1	0		HDAC6	0
AGR3	0		FGF14	0		HERPUD1	0
AHI1	0		FGF3	0		HIP1	0
AKAP6	0		FGF8	0		HIPK1	0
ALDH1A1	0		FGFR1OP2	0		HIPK2	0
ALDH2	0		FGFR1OP	0		HIST1H1C	0
ALDOC	0		FGFR2	0		HIST1H1D	0
ALK	0		FLCN	0		HIST1H1E	0
AMH	0		FLNC	0		HIST1H2AG	0
ANGPT1	0		FLT3LG	0		HIST1H2AL	0
ANLN	0		FNBP1	0		HIST1H2AM	0
APOD	0		FOSB	0		HIST1H2BC	0
ARID2	0		FOSL1	0		HIST1H3B	0
ARRDC4	0		FOXO3	0		HMGA1	0
ASMTL	0		FRK	0		HMGB1	0
ASXL1	0		FRS2	0		HOXA11	0
AURKA	0		FSTL3	0		HOXA3	0
AXL	0		FUT1	0		HOXA9	0
BACH2	0		FZD2	0		HOXC13	0
BARD1	0		GANAB	0		HRAS	0
BAX	0		GBP2	0		HSPA2	0
BAZ2A	0		GNAQ	0		HSPA5	0
BCAS3	0		GNG4	0		HTRA1	0
BCL2L2	0		GOPC	0		IBSP	0
BCL7A	0		GOT1	0		ICAM1	0
BCL9	0		GPHN	0		ICK	0
BHLHE22	0		H3F3A	0		ID3	0
BICC1	0		HAS2	0		IDH1	0
BIN1	0		HDAC1	0		IGFBP3	0
BIRC3	0		HDAC3	0		IKZF2	0
BIRC6	0		HDAC6	0		IKZF3	0
BMP4	0		HEPH	0		IL12RB2	0
BRWD3	0		HERPUD1	0		IL13RA2	0
BTG1	0		HES5	0		IL13	0
BTLA	0		HHEX	0		IL15	0
BUB1B	0		HIP1	0		IL1B	0
C11orf1	0		HIPK1	0		IL1RAP	0
CACNA1F	0		HIST1H1C	0		IL21R	0
CAD	0		HIST1H1D	0		IL2	0
CALR	0		HIST1H2AG	0		IL6	0
CAMK2G	0		HIST1H2BJ	0		IL7R	0
CASC5	0		HIST1H2BK	0		CXCL8	0
CASP7	0		HIST1H3B	0		INHBA	0
CAV1	0		HNRNPA2B1	0		INPP4B	0
CCDC28A	0		HOXA11	0		INPP5A	0
CCDC6	0		HOXA3	0		INPP5D	0
CCNA2	0		HOXA9	0		IQCG	0
CD28	0		HRAS	0		IRF8	0
CD8A	0		HSPA2	0		ITGA7	0
CDC25C	0		HSPA5	0		ITGA8	0
CDH11	0		IBSP	0		ITGB3	0
CDK12	0		ICAM1	0		ITK	0
CDKL5	0		ID1	0		ITPKA	0
CDKN1A	0		ID3	0		JAG2	0
CDKN1B	0		IDH1	0		JAK1	0
CDKN2A	0		IFRD1	0		JAZF1	0
CDX1	0		IKBKB	0		JUN	0
CEBPA	0		IL13	0		KAT2B	0
CEBPB	0		IL15	0		KDM4C	0
CHCHD7	0		IL1B	0		KDM5A	0
CHEK2	0		IL21R	0		KDM5C	0
CIRH1A	0		IL2RA	0		KDM6A	0
CIT	0		IL3	0		KEAP1	0
CKB	0		IL6	0		ATG13	0
CLTCL1	0		INPP5D	0		CCAR2	0
COG5	0		IQCG	0		KLHL6	0
COL11A1	0		IRF8	0		KSR1	0
COL6A3	0		ITGA7	0		LAMP2	0
COL9A3	0		JAG2	0		LASP1	0
CPNE1	0		JAK1	0		LEF1	0
CRADD	0		JAK3	0		LEFTY2	0
CSF1R	0		JAZF1	0		LGALS3	0
CSF1	0		JUN	0		LHFP	0
CTCF	0		KDM2B	0		LINGO2	0
CTNNB1	0		KDM4C	0		LMO1	0
CTNND2	0		KDM5A	0		LMO2	0
ACKR3	0		KDR	0		LMO7	0
CYP2C19	0		KDSR	0		LNP1	0
DAXX	0		ATG13	0		LPAR1	0
DDX10	0		KIAA1524	0		LPP	0
DEK	0		KIT	0		LRMP	0
DGKZ	0		KLF4	0		LRRC37B	0
DKK1	0		LASP1	0		LYL1	0
DKK2	0		LCK	0		LYN	0
DNM1	0		LEF1	0		MACROD1	0
DNM2	0		LHFP	0		MAD2L1	0
DNMT1	0		LINGO2	0		MAGED1	0
DOCK1	0		LMO1	0		MALT1	0
DTX1	0		LINC00598	0		MAML1	0
EBF1	0		LOX	0		MAML2	0
EDNRB	0		LPAR1	0		MAP2K1	0
EED	0		LPP	0		MAP3K1	0
EGF	0		LPXN	0		MAP3K6	0
EGR2	0		LRIG3	0		MAPK1	0
EGR4	0		LRPPRC	0		MAPK3	0
ELF4	0		LYL1	0		MAPRE1	0
ELK4	0		LYN	0		MAX	0
ELN	0		MACROD1	0		MBNL1	0
EML1	0		MADD	0		MBTD1	0
EPC1	0		MAF	0		MCL1	0
EPHB1	0		MALT1	0		MDC1	0
EPOR	0		MAML2	0		MDH1	0
EPO	0		MAP2	0		MDS2	0
ERBB4	0		MAP3K1	0		MEAF6	0
ERCC1	0		MAP3K6	0		MEF2B	0
ERCC3	0		MAP3K7	0		MEF2C	0
ERG	0		MAPK8	0		MELK	0
ETV1	0		MBNL1	0		METTL7B	0
EWSR1	0		MCL1	0		MET	0
EXOSC6	0		MDC1	0		MFNG	0
EXT1	0		MDM4	0		MGMT	0
EYA1	0		MDS2	0		MIB1	0
FAM19A5	0		MEAF6	0		MKI67	0
NUTM2A	0		MEF2C	0		MKL1	0
FANCF	0		MELK	0		CENPU	0
FANCG	0		MFNG	0		MLH1	0
FANCI	0		CENPU	0		MLLT6	0
FANCM	0		MLF1	0		MMP7	0
FASLG	0		MLH1	0		MMP9	0
FGF1	0		KMT2B	0		MNAT1	0
FGF8	0		MLLT10	0		MPL	0
FGFR2	0		MMP9	0		MRE11A	0
FGFR3	0		MNAT1	0		MSI2	0
FH	0		MPL	0		MTUS2	0
FIGF	0		MRE11A	0		MYB	0
FLCN	0		MSN	0		MYCN	0
FLNC	0		MYB	0		MYC	0
FOSL1	0		MYC	0		MYO1F	0
FRMPD4	0		MYD88	0		NAB2	0
FSTL3	0		MYO1F	0		NBN	0
FZD6	0		KAT6A	0		NCAM1	0
GAS1	0		KAT6B	0		NCOA3	0
GAS5	0		NAB2	0		NCOA4	0
GATA6	0		NAPA	0		NDUFAF1	0
GBP2	0		NBR1	0		NEDD4	0
GIT2	0		NCOA1	0		NEURL1	0
GLI1	0		NCOA3	0		NFATC1	0
GNA13	0		NCOA4	0		NFATC2	0
GPHN	0		NDC80	0		NFE2L2	0
GRIN2A	0		NDUFAF1	0		NFKB1	0
GRIN2B	0		NEDD4	0		NFKB2	0
GSK3B	0		NF1	0		NFKBIA	0
GTSE1	0		NFATC1	0		NGFR	0
HDAC1	0		NFATC2	0		NGF	0
HDAC2	0		NFE2L2	0		NIN	0
HDAC3	0		NFKBIA	0		NKX2-5	0
HDAC6	0		NIN	0		NOD1	0
HEPH	0		NIPBL	0		NODAL	0
HERPUD1	0		NKX2-5	0		NOTCH2	0
HES1	0		NOD1	0		NPM1	0
HHEX	0		NODAL	0		NR3C1	0
HIPK1	0		NOTCH2	0		NR4A3	0
HIST1H1D	0		NR3C1	0		NR6A1	0
HIST1H2AC	0		NR4A3	0		NTF4	0
HLF	0		NR6A1	0		NUMA1	0
HMGA1	0		NRAS	0		NUP214	0
HOXA3	0		NTF3	0		NUP93	0
HOXA9	0		NUP107	0		NUP98	0
ICAM1	0		NUP214	0		OLIG1	0
ID3	0		NUP93	0		OLIG2	0
IDH1	0		OLIG1	0		OLR1	0
IFRD1	0		OLR1	0		OMD	0
IL13	0		P2RY8	0		P2RY8	0
IL15	0		PAK1	0		PAFAH1B2	0
IL1B	0		PAK6	0		PAK1	0
IL1R1	0		PAK7	0		PAK6	0
IL21R	0		PAX8	0		PATZ1	0
IL6	0		PCM1	0		PAX5	0
IL7R	0		PDCD11	0		PAX8	0
CXCL8	0		PDCD1LG2	0		PCBP1	0
INPP4B	0		PDGFD	0		PCM1	0
IRF8	0		PDGFRB	0		PC	0
ITPKA	0		PDK1	0		PDCD11	0
JAG2	0		PEG3	0		PDCD1LG2	0
JAK1	0		PER1	0		PDGFB	0
JAK3	0		PFDN5	0		PDGFD	0
JUN	0		PHB	0		PDGFRB	0
KDM4C	0		PHF1	0		PDK1	0
KDM5A	0		PHOX2B	0		PEG3	0
KDM5C	0		PICALM	0		PER1	0
KDM6A	0		PIK3CA	0		PFDN5	0
KIAA1524	0		PIK3CD	0		PHF1	0
KLF4	0		PIK3R2	0		PHF23	0
LCK	0		PLA2G2A	0		PHOX2B	0
LEF1	0		PLA2G5	0		PICALM	0
LEFTY2	0		PLAG1	0		PIK3CA	0
LINGO2	0		PLAT	0		PIK3CD	0
LMO1	0		PLCB1	0		PIK3CG	0
LOX	0		PLCB4	0		PIK3R1	0
LPAR1	0		POFUT1	0		PIK3R2	0
LPP	0		POLR2H	0		PKM	0
LPXN	0		POM121	0		PLA2G2A	0
LRMP	0		POSTN	0		PLA2G5	0
LRPPRC	0		POU5F1	0		PLAG1	0
LRRC37B	0		PPM1D	0		PLAT	0
LYN	0		PPP1CB	0		PLCB4	0
MAD2L1	0		PPP3CA	0		PLEKHM2	0
MAML2	0		PPP3CB	0		PML	0
MAP3K1	0		PPP3CC	0		PMS1	0
MAPK3	0		PPP3R1	0		POLD1	0
MAPRE1	0		PQLC3	0		POLR2H	0
MBNL1	0		PRCC	0		POSTN	0
MBTD1	0		PRKACA	0		POU2AF1	0
MDC1	0		PRKACG	0		POU5F1	0
MDM4	0		PRKCB	0		PPAP2B	0
MDS2	0		PRKG2	0		PPARGC1A	0
MEAF6	0		PRMT1	0		PPFIA2	0
MELK	0		PRMT8	0		PPP1CB	0
METTL7B	0		PRRX2	0		PPP3CA	0
MIB1	0		PSEN1	0		PPP3CB	0
CENPU	0		PSMD2	0		PPP3CC	0
MLLT1	0		PTPN2	0		PPP3R2	0
MLLT3	0		PTPRA	0		PQLC3	0
MMP9	0		PTPRO	0		PRCC	0
MPL	0		PTPRR	0		PRKACG	0
MRE11A	0		RABEP1	0		PRKCD	0
MSH2	0		RAD21	0		PRMT1	0
MSI2	0		RAD50	0		PRMT8	0
MUTYH	0		RAD51	0		PRRX1	0
MYCL	0		RANBP17	0		PRRX2	0
MYO1F	0		RAP1GDS1	0		PRSS8	0
KAT6A	0		RARA	0		PSEN1	0
KAT6B	0		RASGEF1A	0		PSMD2	0
NBR1	0		RASGRP1	0		PTK2	0
NDUFAF1	0		RB1	0		PTK7	0
NEDD4	0		RBM15	0		PTPRK	0
NFATC1	0		RCOR1	0		PTPRR	0
NFATC2	0		REEP3	0		PTTG1	0
NFE2L2	0		RELA	0		PVT1	0
NFKB1	0		RELN	0		RABEP1	0
NGFR	0		RGS7	0		RAC3	0
NGF	0		RHOA	0		RAD21	0
NIN	0		RICTOR	0		RAD50	0
NKX2-5	0		RLTPR	0		RAD51C	0
NOD1	0		RNF43	0		RAP1GDS1	0
NOTCH2	0		ROBO1	0		RARA	0
NOTCH4	0		ROBO2	0		RB1	0
NPM1	0		RPL22	0		RBM15	0
NR6A1	0		RPN2	0		RCOR1	0
NRAS	0		RPS21	0		REEP3	0
NTF4	0		RRM2B	0		RELA	0
NTRK2	0		RTN3	0		RELN	0
NUP98	0		SARNP	0		RHOH	0
OMD	0		SDC4	0		ROBO2	0
PAK7	0		SDHAF2	0		RPA3	0
PASK	0		SEPT2	0		RPL22	0
PAX3	0		SEPT5	0		RPN1	0
PCBP1	0		SEPT9	0		RPN2	0
PCM1	0		SERPINE1	0		RPS21	0
PDGFB	0		SETBP1	0		RPS6KA1	0
PDGFRA	0		SET	0		RPS6KA2	0
PDGFRB	0		SUGP2	0		RRM2B	0
PER1	0		SRSF3	0		RTN3	0
PFDN5	0		SH2D5	0		RUNX1T1	0
PHB	0		SH3D19	0		RUNX2	0
PHF23	0		SH3GL2	0		RYR3	0
PHOX2B	0		SHC1	0		SCN8A	0
PICALM	0		SIN3A	0		SDHAF2	0
PIK3CG	0		SLC7A5	0		SEPT2	0
PIK3R2	0		SMARCA1	0		SEPT5	0
PLCB1	0		SMARCA5	0		SEPT9	0
POFUT1	0		SMARCB1	0		SERPINF1	0
POLR2H	0		SMC1A	0		SRSF3	0
POU5F1	0		SNHG5	0		SGK1	0
PPP1CB	0		SNW1	0		SGPP2	0
PPP2R1A	0		SORBS2	0		SH2D5	0
PPP3CA	0		SORT1	0		SH3BP1	0
PPP3CB	0		SOX2	0		SH3D19	0
PPP3CC	0		SP1	0		SH3GL2	0
PRCC	0		SPOP	0		SHC1	0
PRKACA	0		SPRY4	0		SIN3A	0
PRKACG	0		SPTAN1	0		SLC1A2	0
PRMT8	0		SPTBN1	0		SLC45A3	0
PRRX2	0		SRGAP3	0		SLC7A5	0
PRSS8	0		SRRM3	0		SLCO1B3	0
PTK7	0		SS18L1	0		SMARCA1	0
PTPRA	0		SSX1	0		SMARCA4	0
PTPRR	0		SSX2	0		SMARCA5	0
RABEP1	0		SSX4	0		SMC1A	0
RAD21	0		STAG2	0		SMC3	0
RAD51C	0		STAT3	0		SNAPC3	0
RAD51D	0		STAT4	0		SORT1	0
RANBP17	0		STAT5A	0		SP1	0
RANBP2	0		STAT5B	0		SP3	0
RCOR1	0		STIL	0		SPOP	0
REEP3	0		SUFU	0		SPP1	0
RELA	0		SULF1	0		SPRY2	0
RELN	0		SUV39H2	0		SPRY4	0
RLTPR	0		SUZ12	0		SRF	0
RNF43	0		SYK	0		SRGAP3	0
ROBO2	0		TACC2	0		SRRM3	0
RPL22	0		TAF15	0		STAT5A	0
RRM2B	0		TAL1	0		STK11	0
RTN3	0		TAL2	0		STYK1	0
SEPT9	0		TCEA1	0		SUFU	0
SERPINE1	0		TCL6	0		SUV39H2	0
SERPINF1	0		TCTA	0		SUZ12	0
SRSF3	0		TEAD2	0		SYK	0
SGK1	0		TEAD3	0		SYP	0
SGPP2	0		TEAD4	0		TACC2	0
SH2D5	0		TEC	0		TAL1	0
SH3BP1	0		TERF1	0		TCF12	0
SH3D19	0		TERT	0		TCF3	0
SH3GL2	0		TFDP1	0		TCL1A	0
SIN3A	0		TFEB	0		TCTA	0
SLC7A5	0		TFPT	0		TEAD2	0
SMAD6	0		TFRC	0		TEC	0
SMARCA4	0		TGFB2	0		TERF1	0
SMARCB1	0		TGFB3	0		TERF2	0
SOCS2	0		TGFBR2	0		TERT	0
SORBS2	0		TGFBR3	0		TGFB2	0
SORT1	0		THADA	0		TGFBI	0
SPP1	0		TLX1	0		TIAM1	0
SRGAP3	0		TMEM127	0		TLR4	0
SRRM3	0		TNC	0		TLX1	0
SSX1	0		TNFAIP3	0		TLX3	0
STAT1	0		TNFRSF10B	0		TMEM127	0
STAT5A	0		TNFRSF17	0		TNC	0
SUFU	0		TOP1	0		TNFRSF10B	0
SULF1	0		TP53BP1	0		TNF	0
SUV39H2	0		TP73	0		TOP1	0
SUZ12	0		TPO	0		TP53BP1	0
TACC2	0		TRHDE	0		TPM4	0
TAL1	0		TRIP11	0		TPO	0
TCL6	0		TRPS1	0		TPR	0
TEAD4	0		TSHR	0		TRAF3	0
TERF1	0		TTK	0		TRHDE	0
TERT	0		TTL	0		TRIM33	0
TFDP1	0		U2AF2	0		TRIP11	0
TFPT	0		UBE2B	0		TRPS1	0
TFRC	0		USP16	0		TSHR	0
TGFB2	0		USP42	0		U2AF2	0
TGFBR2	0		USP5	0		UBE2B	0
TGFBR3	0		USP7	0		USP16	0
THRAP3	0		VEGFA	0		USP42	0
TLX1	0		VEGFC	0		USP5	0
TMEM127	0		VHL	0		USP7	0
TNFRSF10B	0		VTI1A	0		VCAM1	0
TOP1	0		WDFY3	0		VEGFC	0
TP53BP1	0		WDR1	0		VHL	0
TRAF3	0		WDR70	0		VTI1A	0
TRIP11	0		WHSC1	0		WASF2	0
TSHR	0		WIF1	0		WDFY3	0
U2AF2	0		WISP3	0		WDR1	0
UBE2B	0		WNT10A	0		WHSC1	0
USP16	0		WNT2B	0		WISP3	0
USP5	0		WNT3	0		WNT10A	0
USP7	0		WNT4	0		WNT16	0
VEGFC	0		WNT8B	0		WNT4	0
VTI1A	0		WRN	0		WNT5B	0
WDR70	0		WSB1	0		WNT7B	0
WEE1	0		WT1	0		WNT8B	0
WHSC1L1	0		WWTR1	0		WRN	0
WIF1	0		XBP1	0		WSB1	0
WNT5B	0		XIAP	0		WT1	0
WSB1	0		XKR3	0		WWTR1	0
WWTR1	0		XPA	0		XBP1	0
XBP1	0		YAP1	0		XIAP	0
XPA	0		YPEL5	0		XPA	0
YPEL5	0		YTHDF2	0		YAP1	0
YTHDF2	0		YY1AP1	0		ZFP64	0
YY1AP1	0		ZFPM2	0		ZMIZ1	0
ZFP64	0		ZFYVE19	0		ZMYM3	0
ZFYVE19	0		ZMIZ1	0		ZMYND11	0
ZMYM2	0		ZMYM3	0		ZNF207	0
ZMYM3	0		ZMYND11	0		ZNF217	0
ZMYND11	0		ZNF217	0		ZNF444	0
ZNF207	0		ZNF24	0		ZNF521	0
ZNF444	0		ZNF444	0		ZNF687	0
ZNF521	0		ZNF521	0		ZNF703	0
ZNF703	0		ZNF703	0		ZRSR2	0
